# Supplementary material for: Study of the Pauson–Khand reaction in flow over alkynylphenyl vinyl ethers: towards the synthesis of tricyclic multisubstituted benzofurans
Source: Royal Society of Chemistry journal article supplement (doi:10.1039/d2ra01062c), 2022-01-01

## Study of the Pauson-Khand reaction in flow over alkynylphenyl vinyl ethers: Towards the synthesis of tricyclic multisubstituted benzofurans.

Jorge García-Lacuna,<sup>a</sup> Maialen Alonso,<sup>a</sup> Gema Domínguez<sup>a</sup> and Javier Pérez Castells\*<sup>a</sup>

### Index

|                                                                                                         |         |
|---------------------------------------------------------------------------------------------------------|---------|
| Spectra of PK products ( <b>3a-3f</b> , <b>2g-2h</b> and <b>2m-2s</b> ).....                            | S2-S31  |
| Spectra of side products isolated from the PKr: ( <b>4a</b> , <b>4k</b> , <b>4l</b> and <b>5</b> )..... | S32-39  |
| Spectra of substrates for the PKr: alkynylaryl vinyl ethers ( <b>1a-1s</b> ).....                       | S40-S77 |

3a: 1,3-dihydro-2H-cyclopenta[b]benzofuran-2-one:

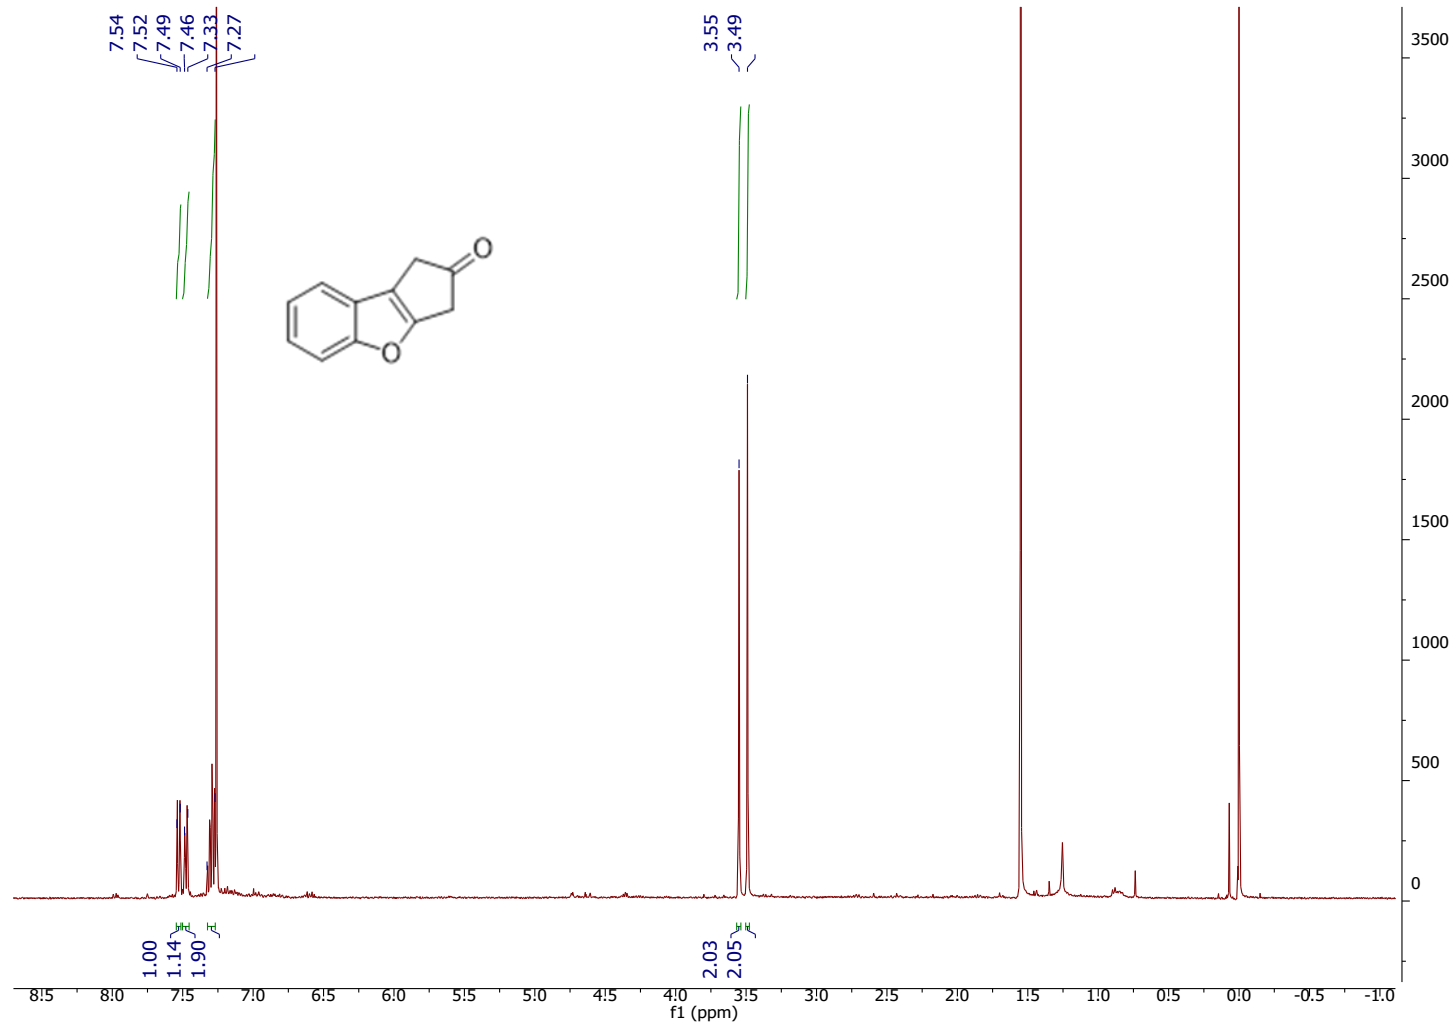

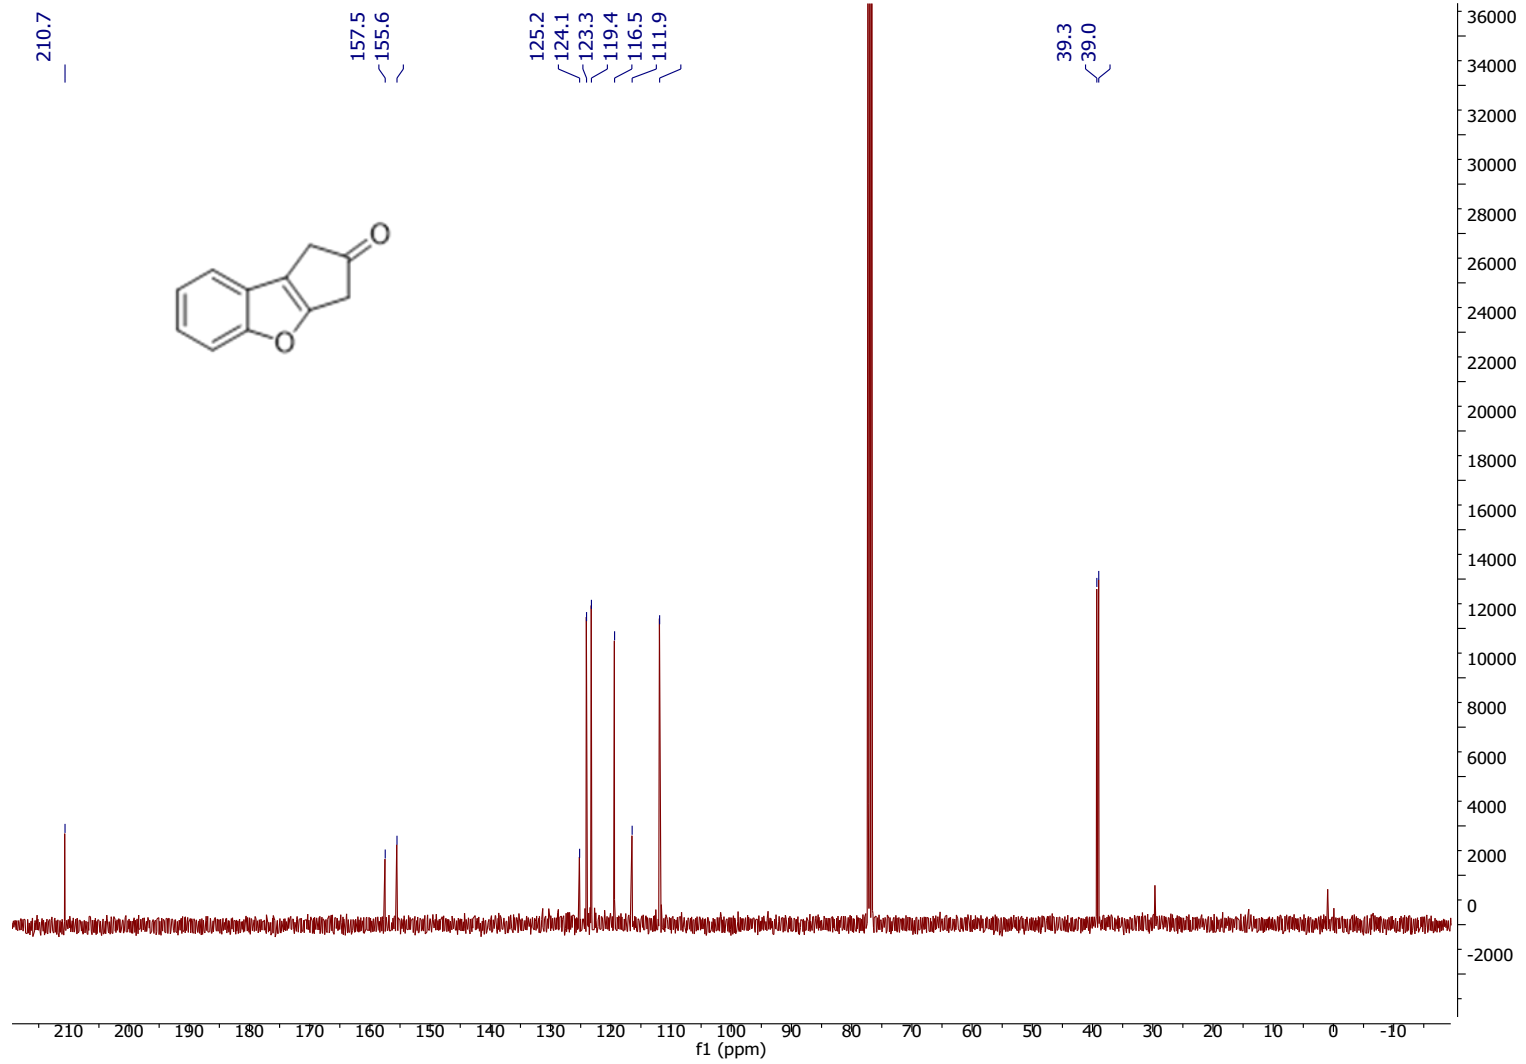

**3b: 7-fluoro-1,3-dihydro-2H-cyclopenta[b]benzofuran-2-one**

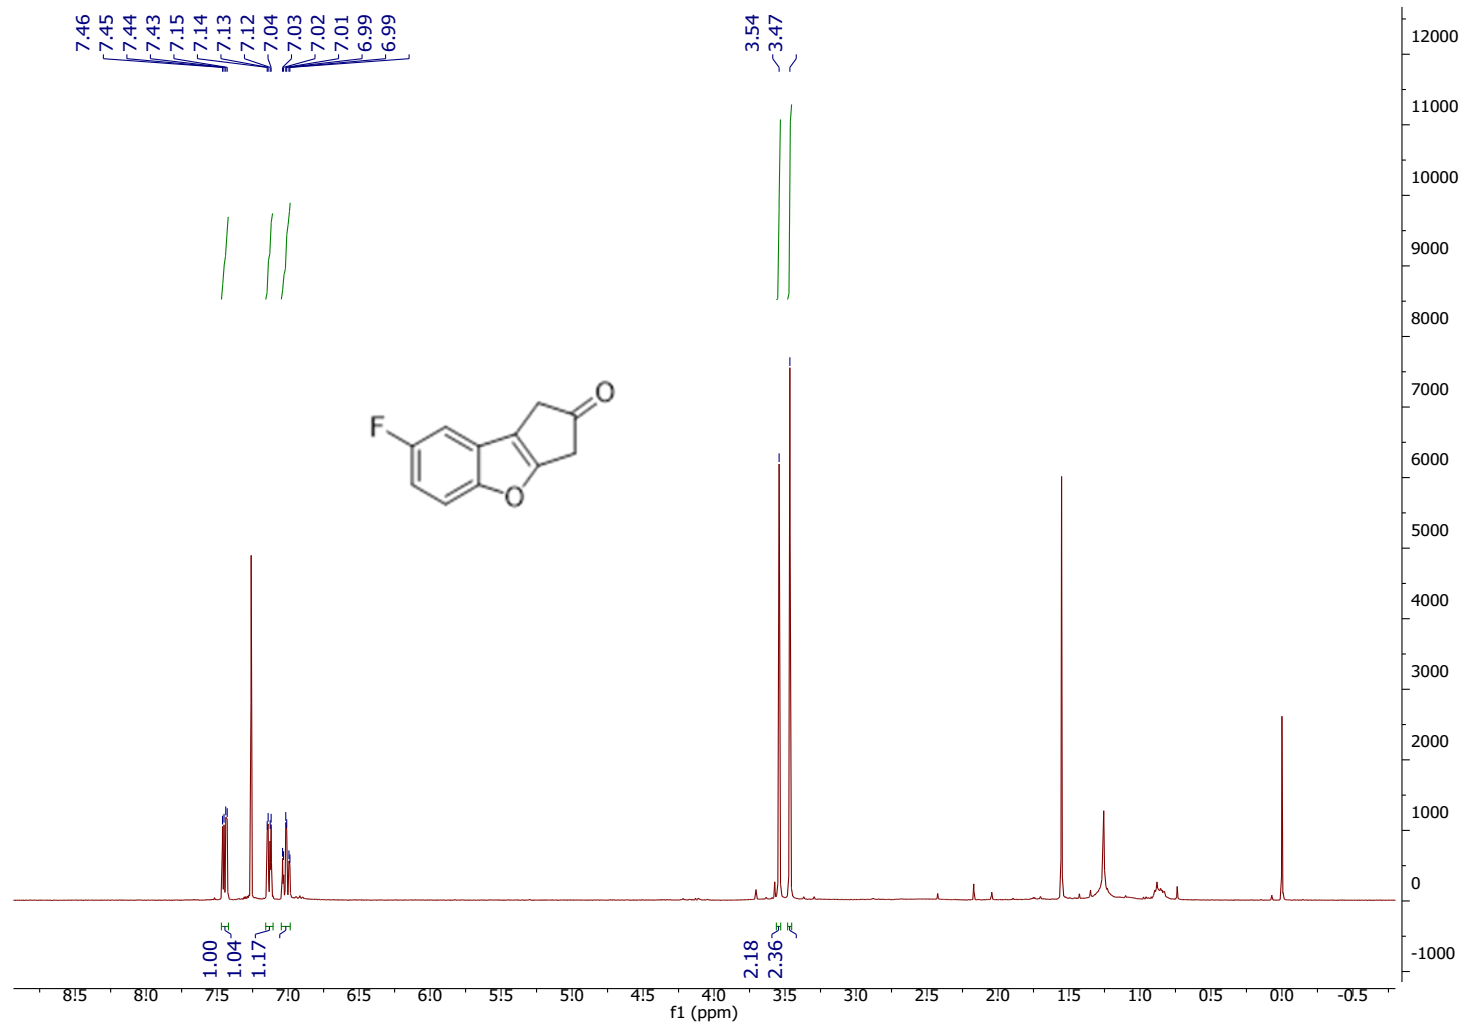

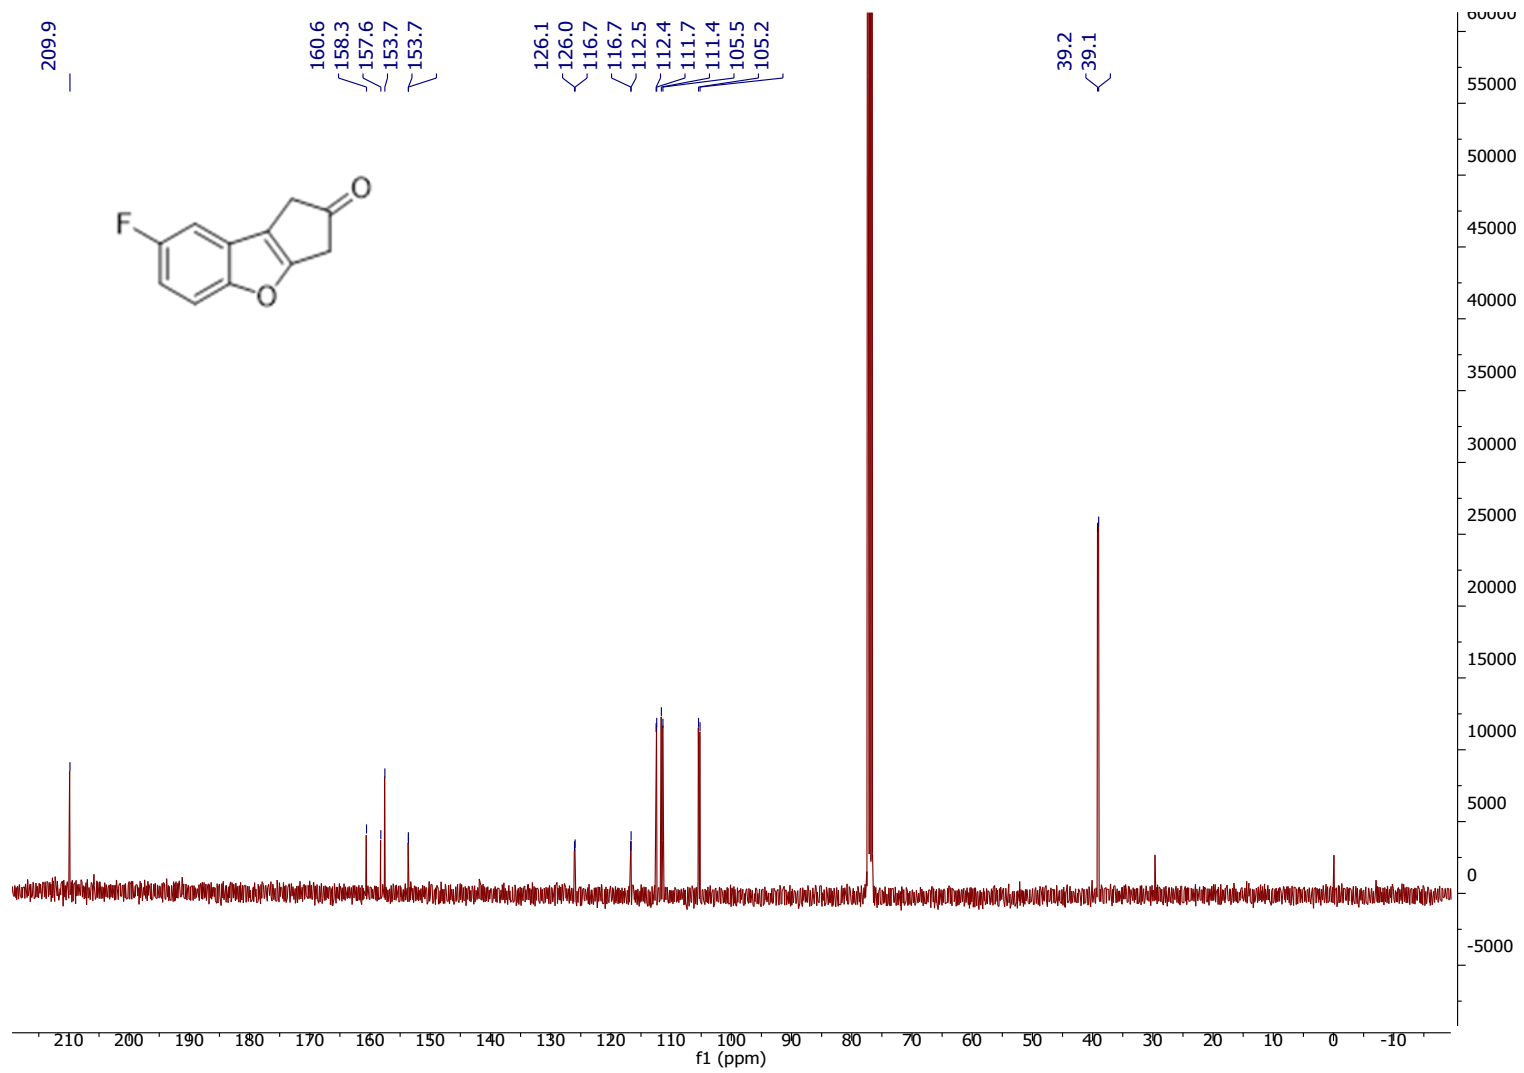

**3c: 7-(*tert*-butyl)-1,3-dihydro-2*H*-cyclopenta[*b*]benzofuran-2-one**

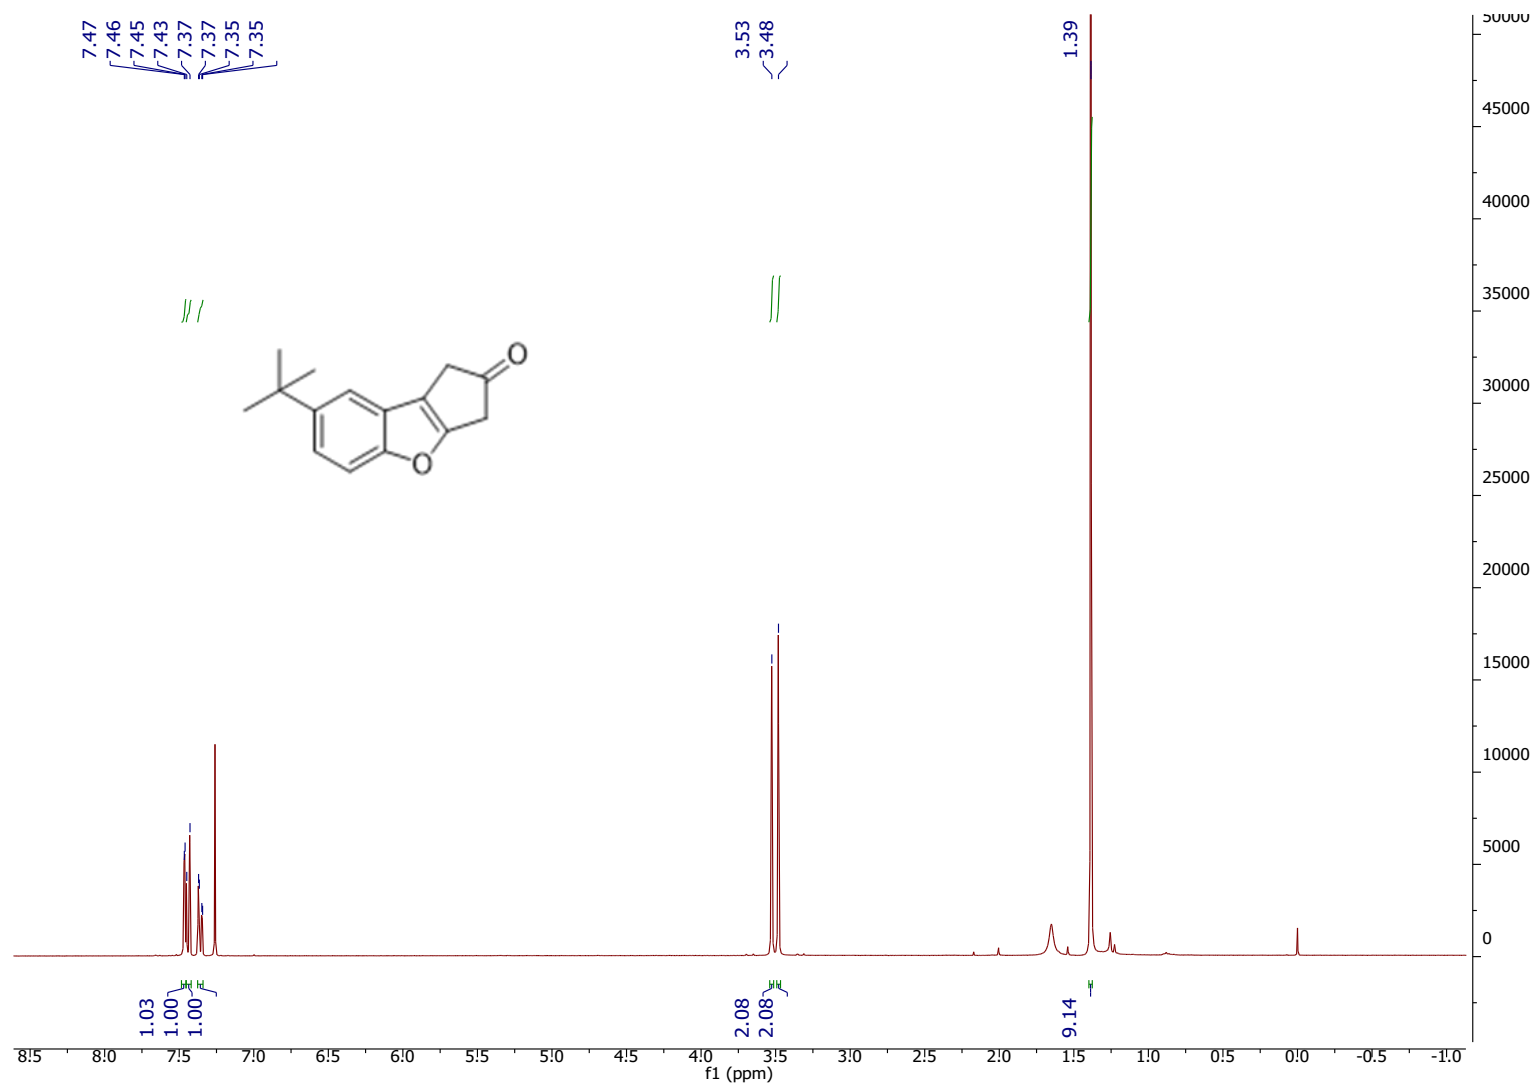

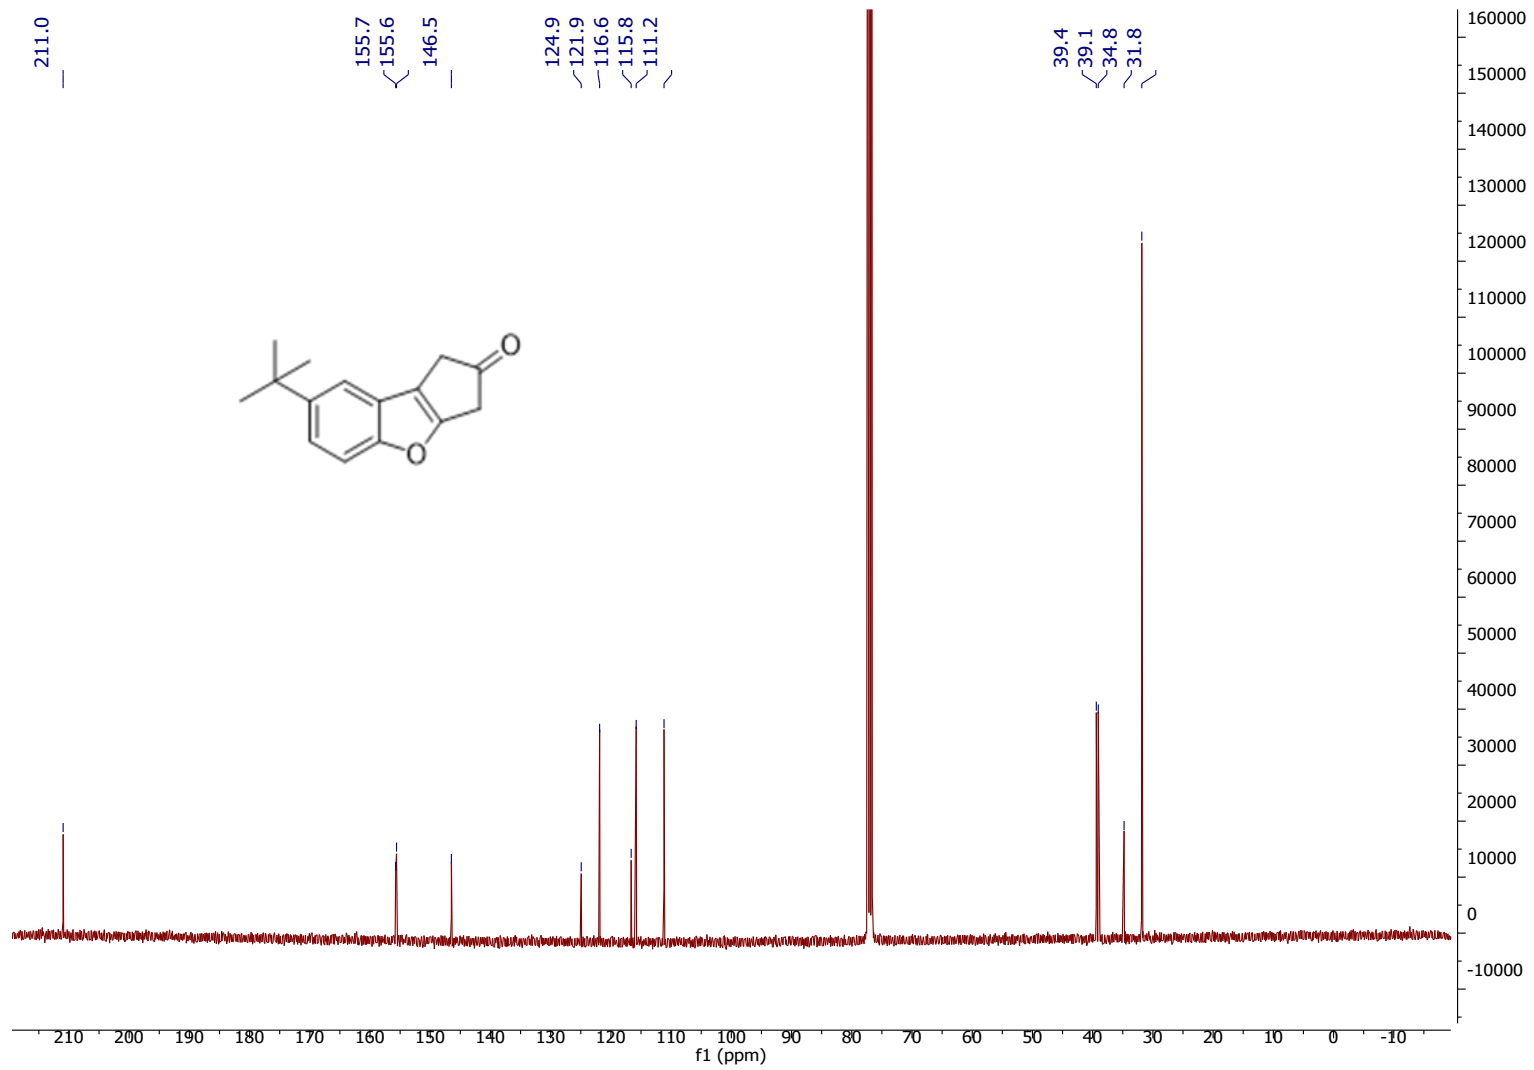

**3d**: 7-methoxy-1,3-dihydro-2H-cyclopenta[*b*]benzofuran-2-one

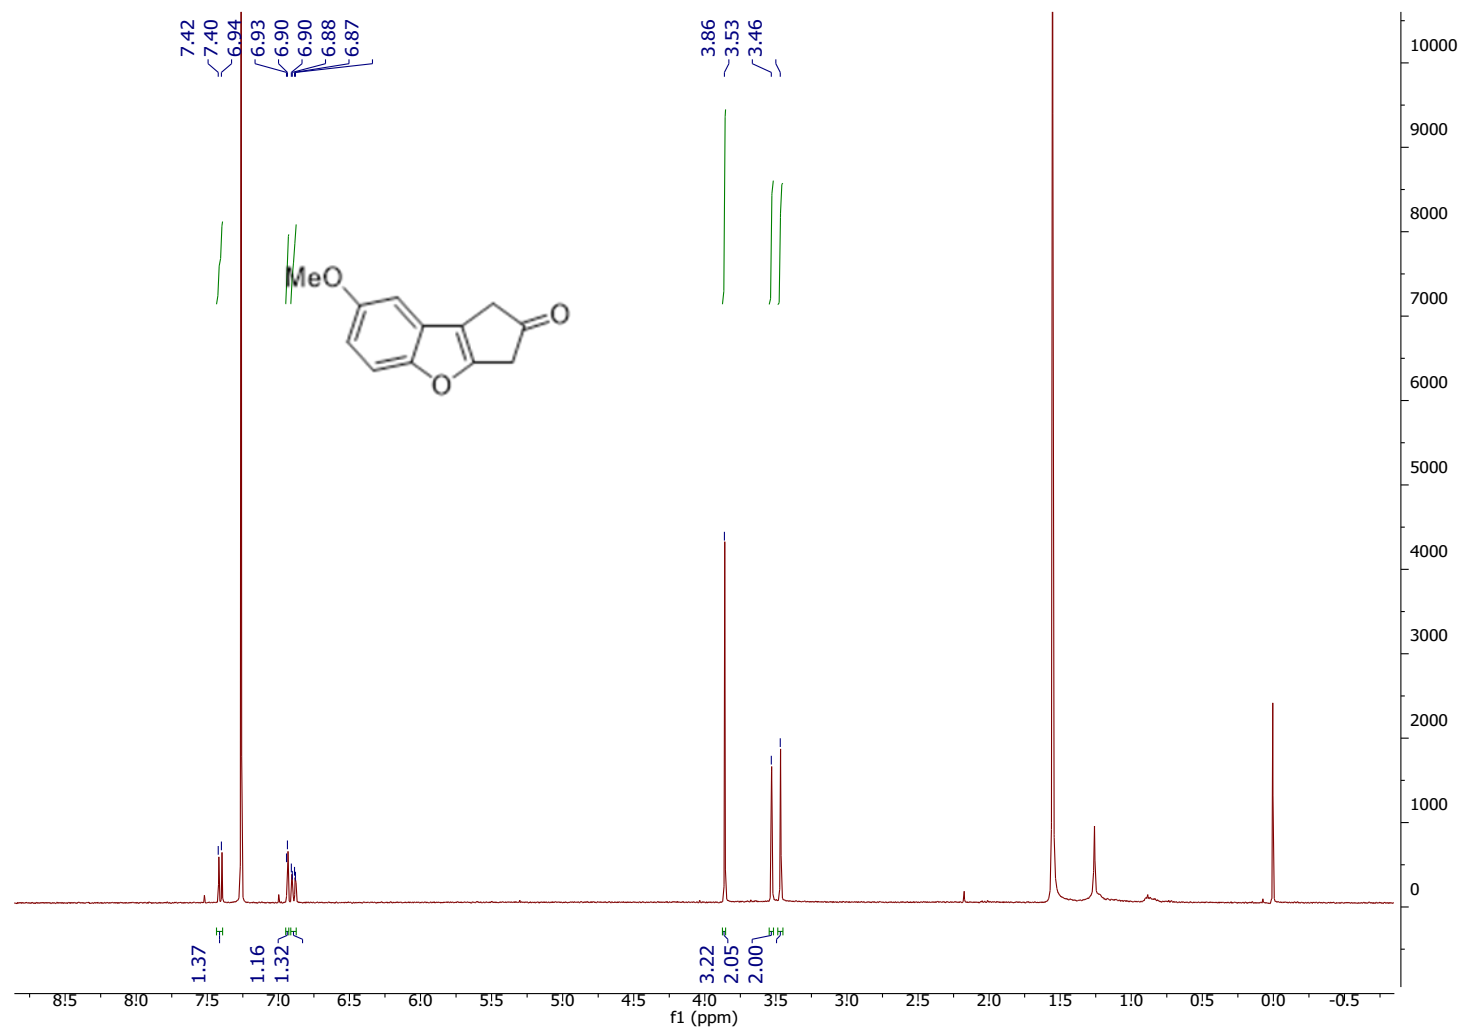



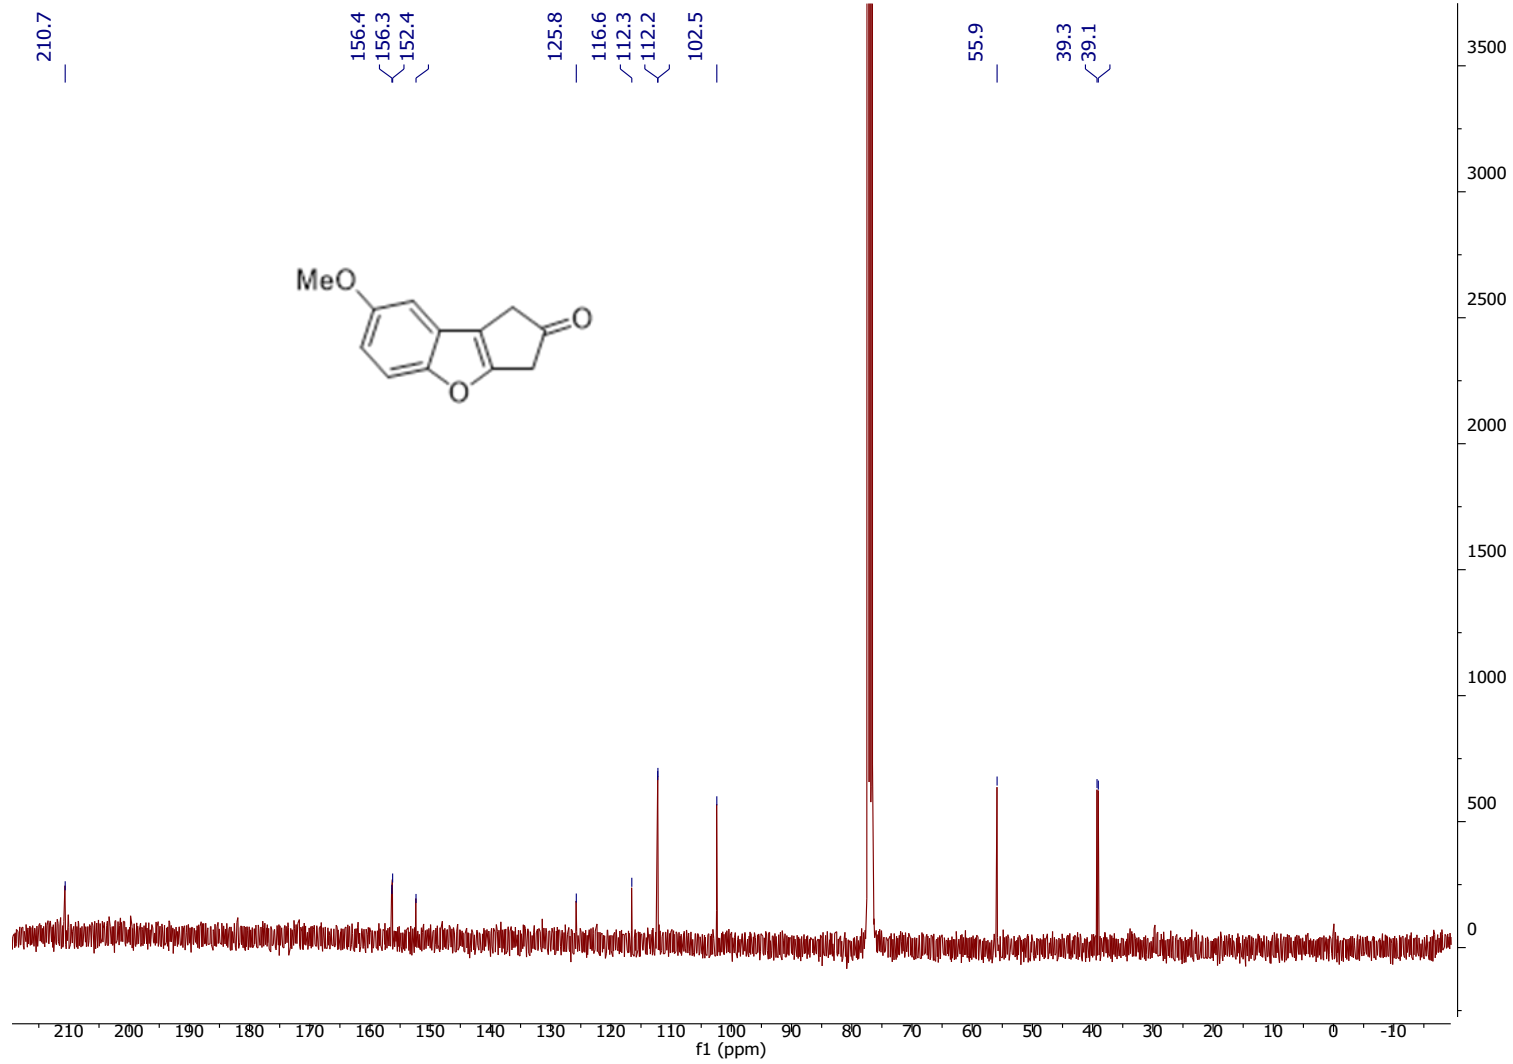

**3e**: 8,10-dihydro-9*H*-cyclopenta[*b*]naphtho[1,2-*d*]furan-9-one

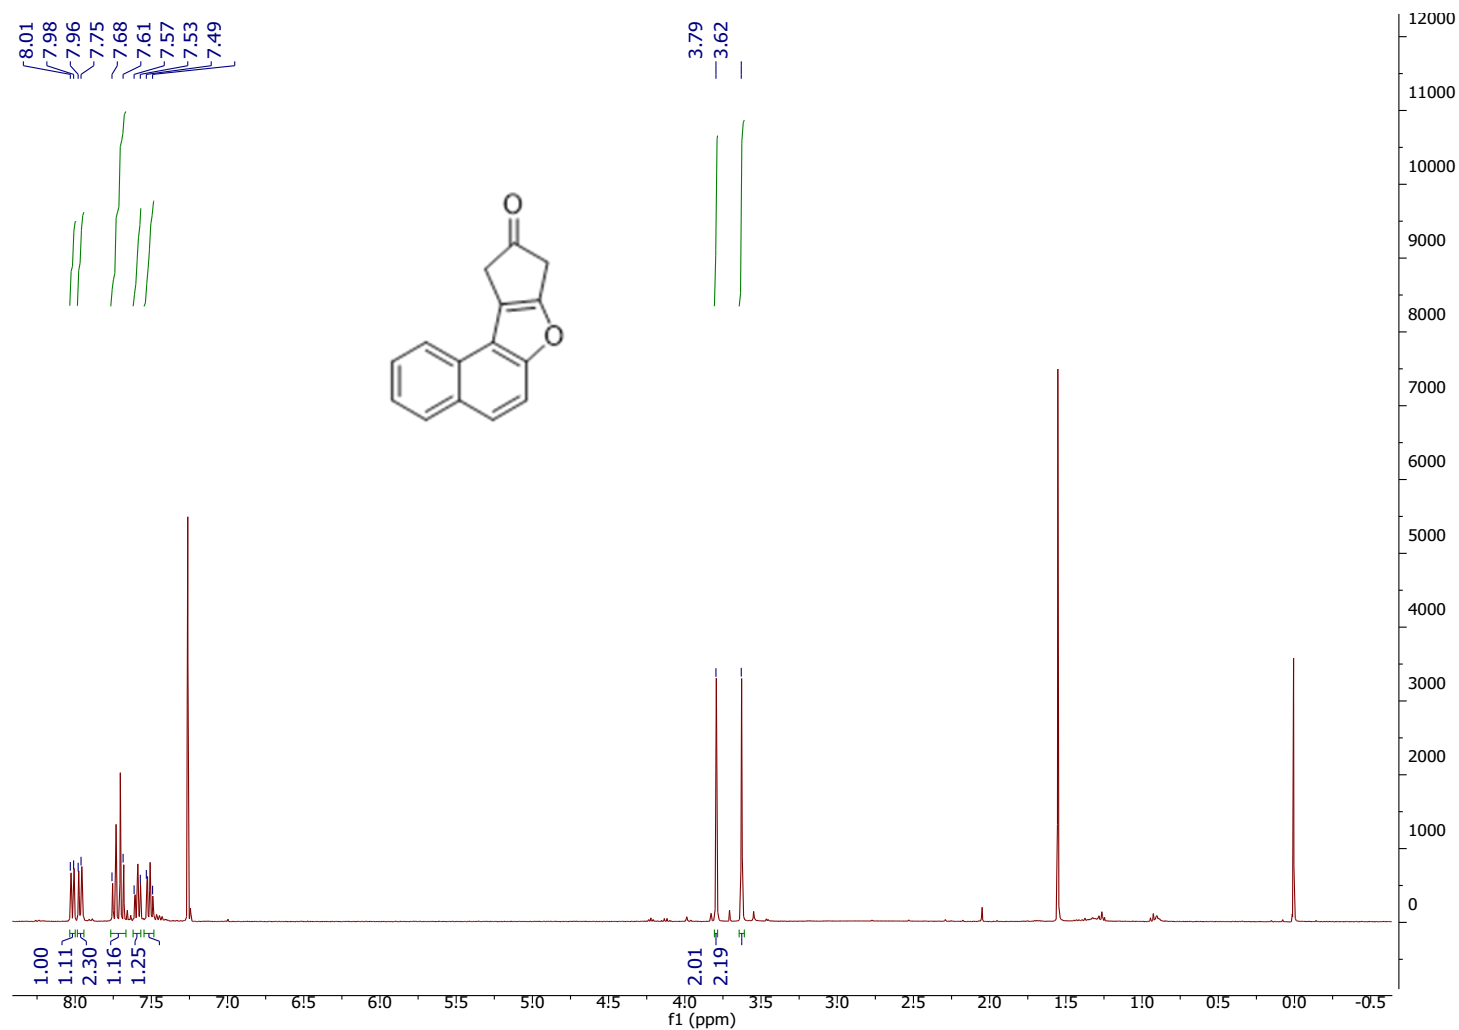

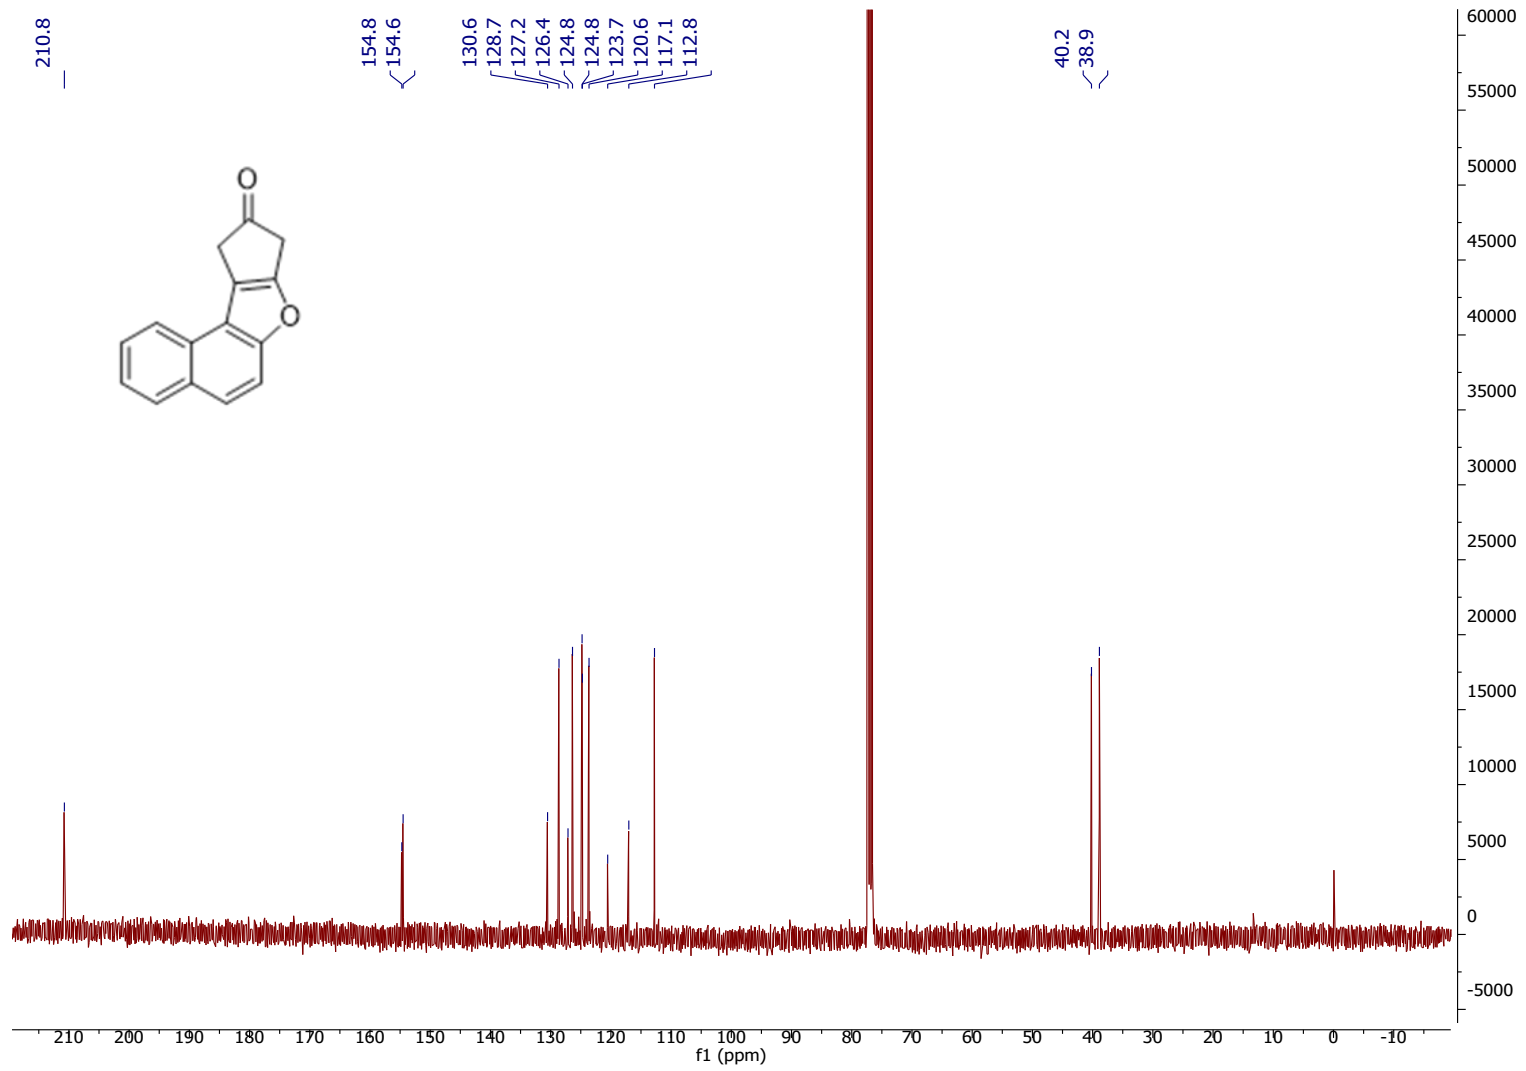

3f: 1,3-dihydro-2H-benzo[b]cyclopenta[d]thiophen-2-one

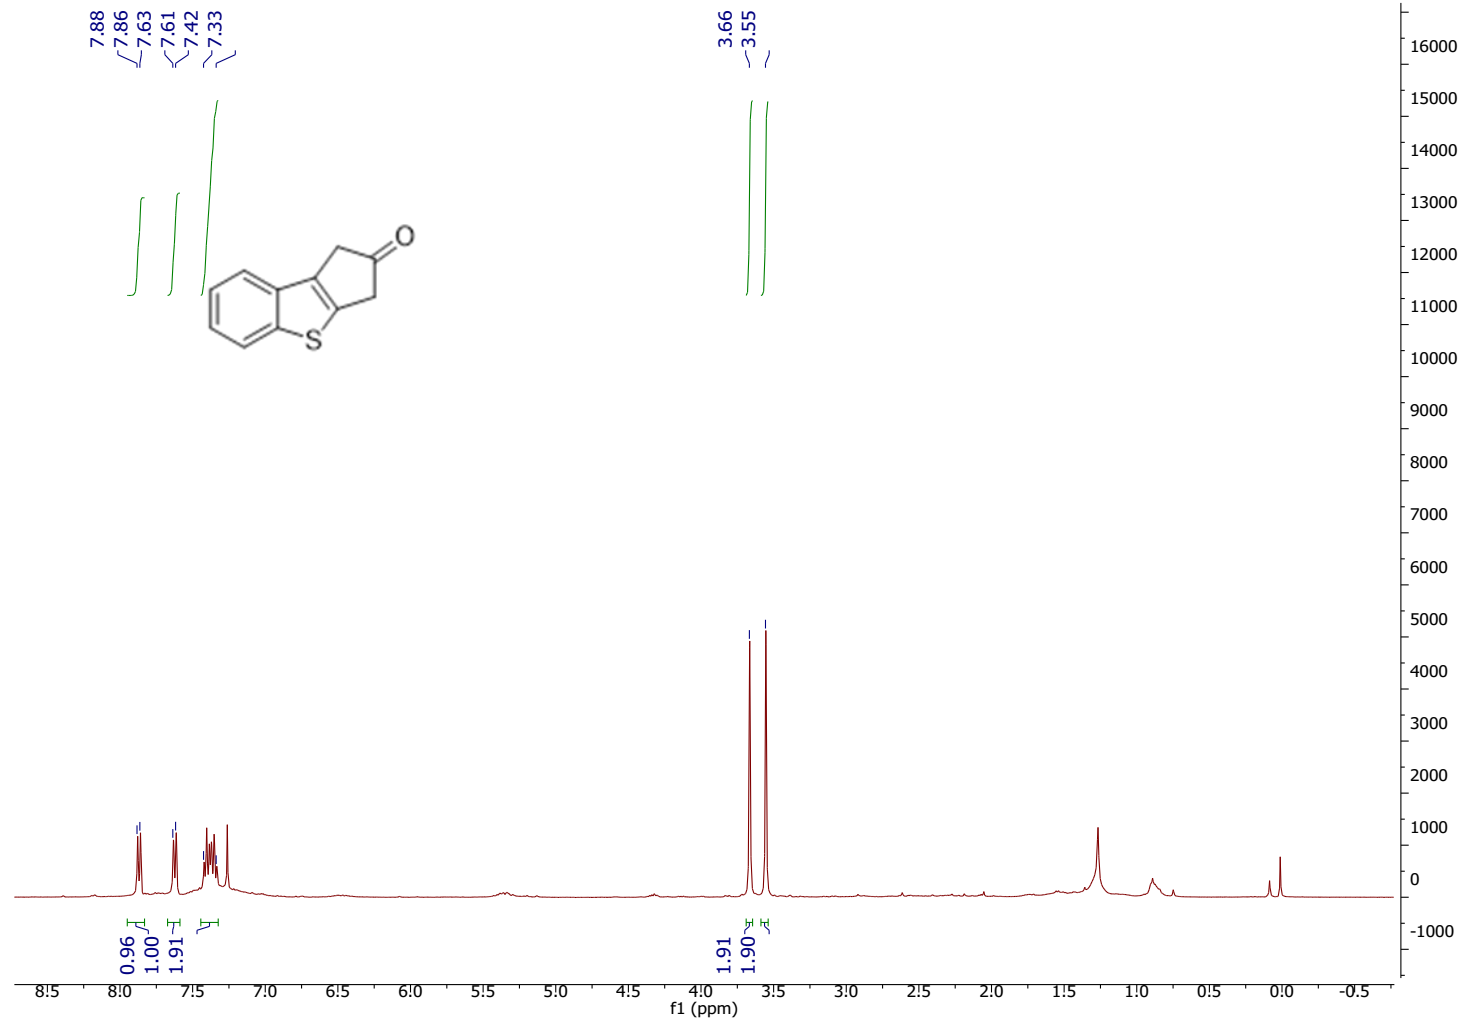

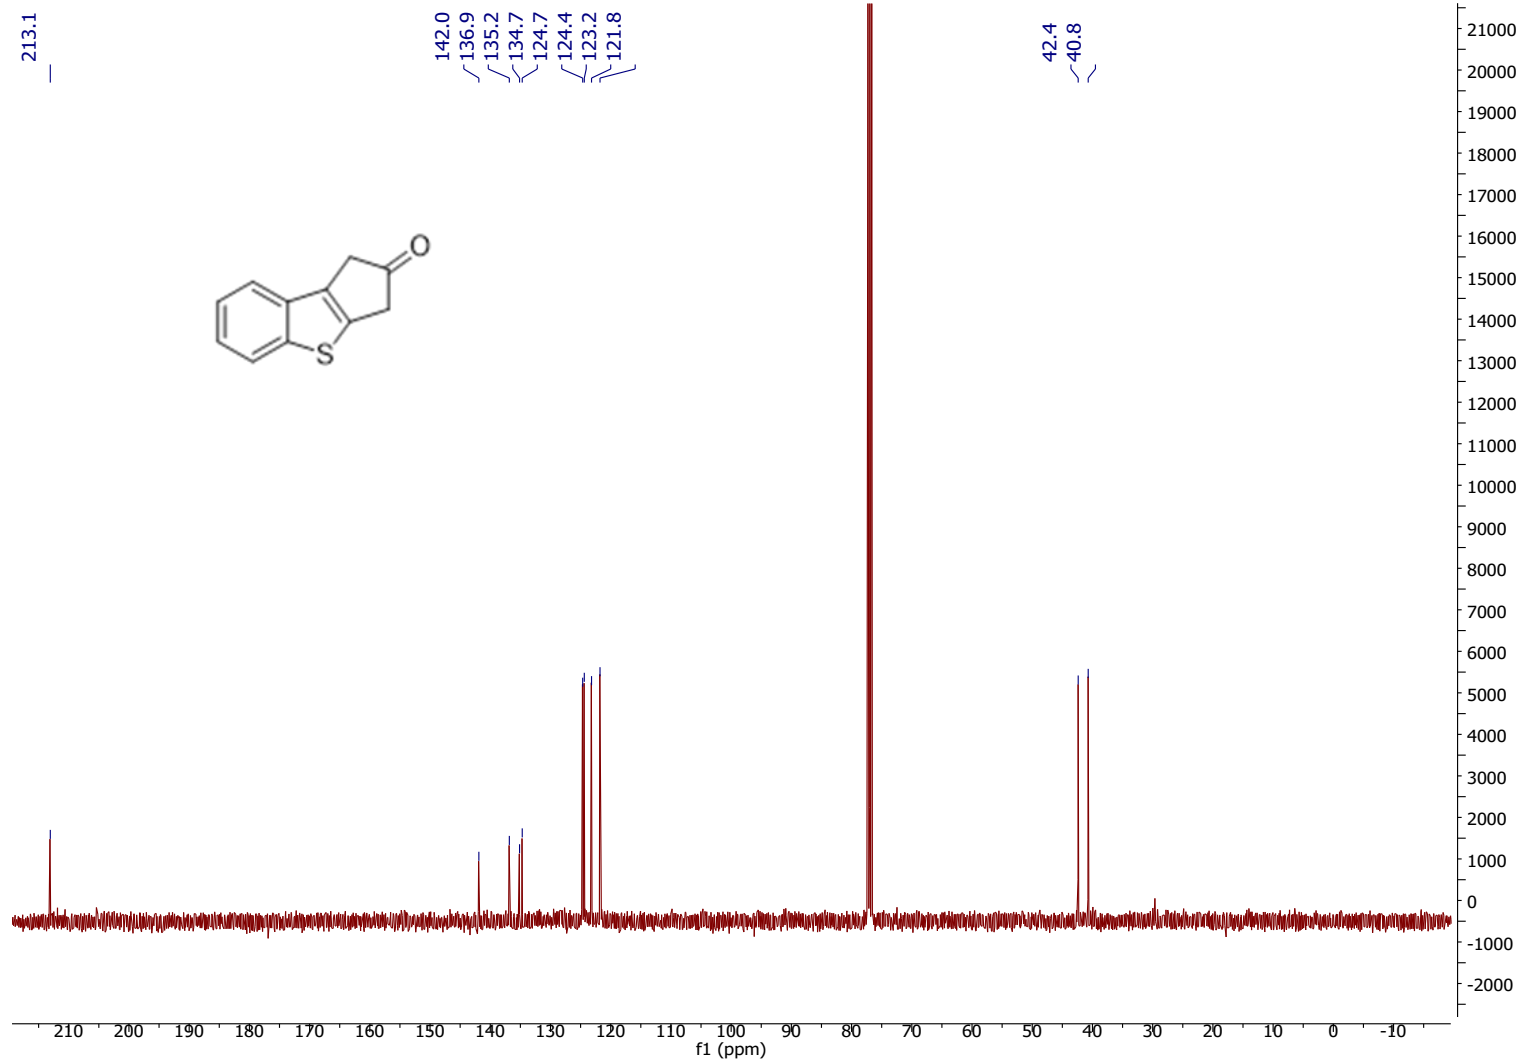

**2g:** 1-(((*tert*-butyldimethylsilyl)oxy)methyl)-3,3a-dihydro-2*H*-cyclopenta[*b*]benzofuran-2-one

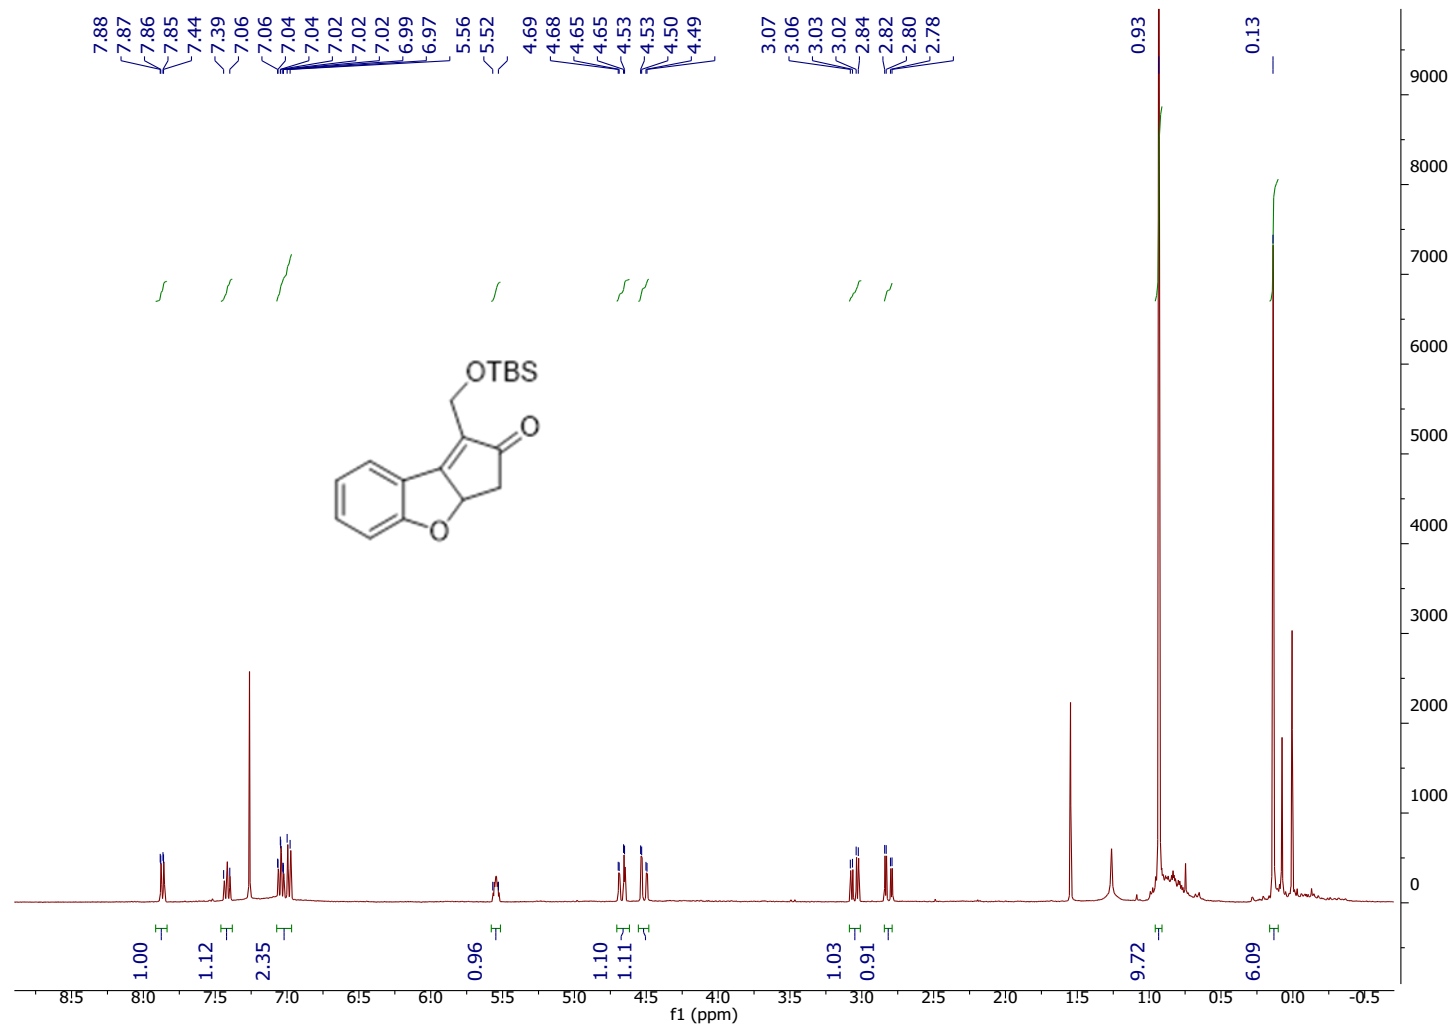

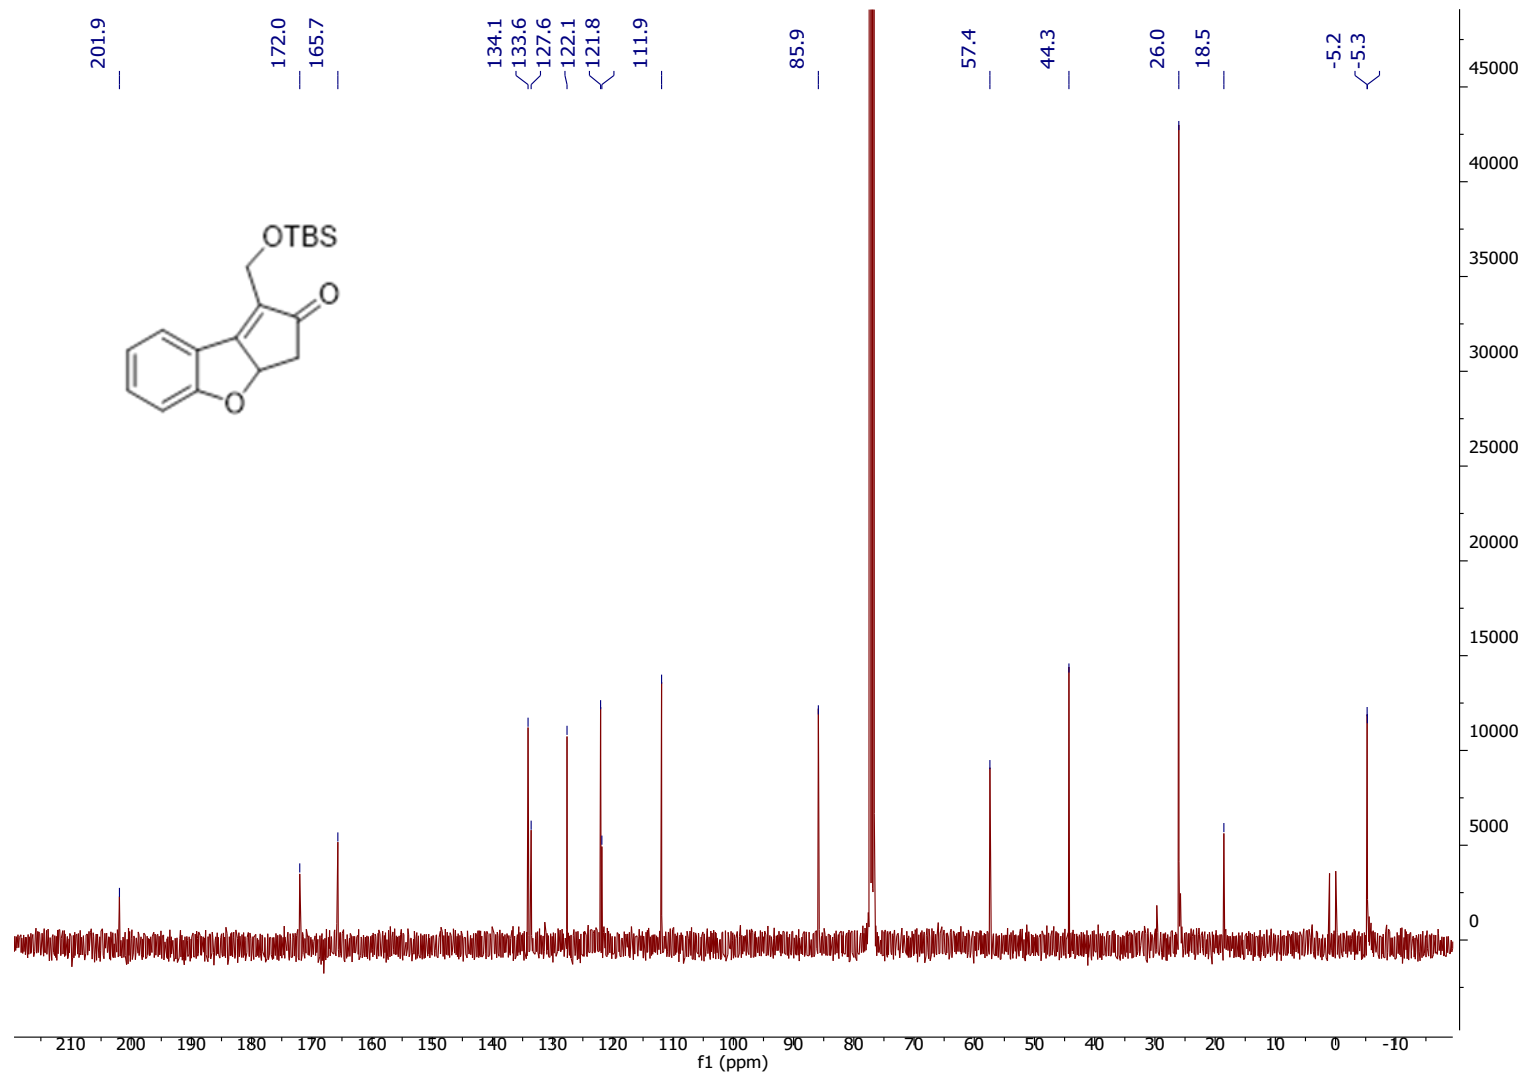

2h: 1-butyl-3,3a-dihydro-2H-cyclopenta[b]benzofuran-2-one.

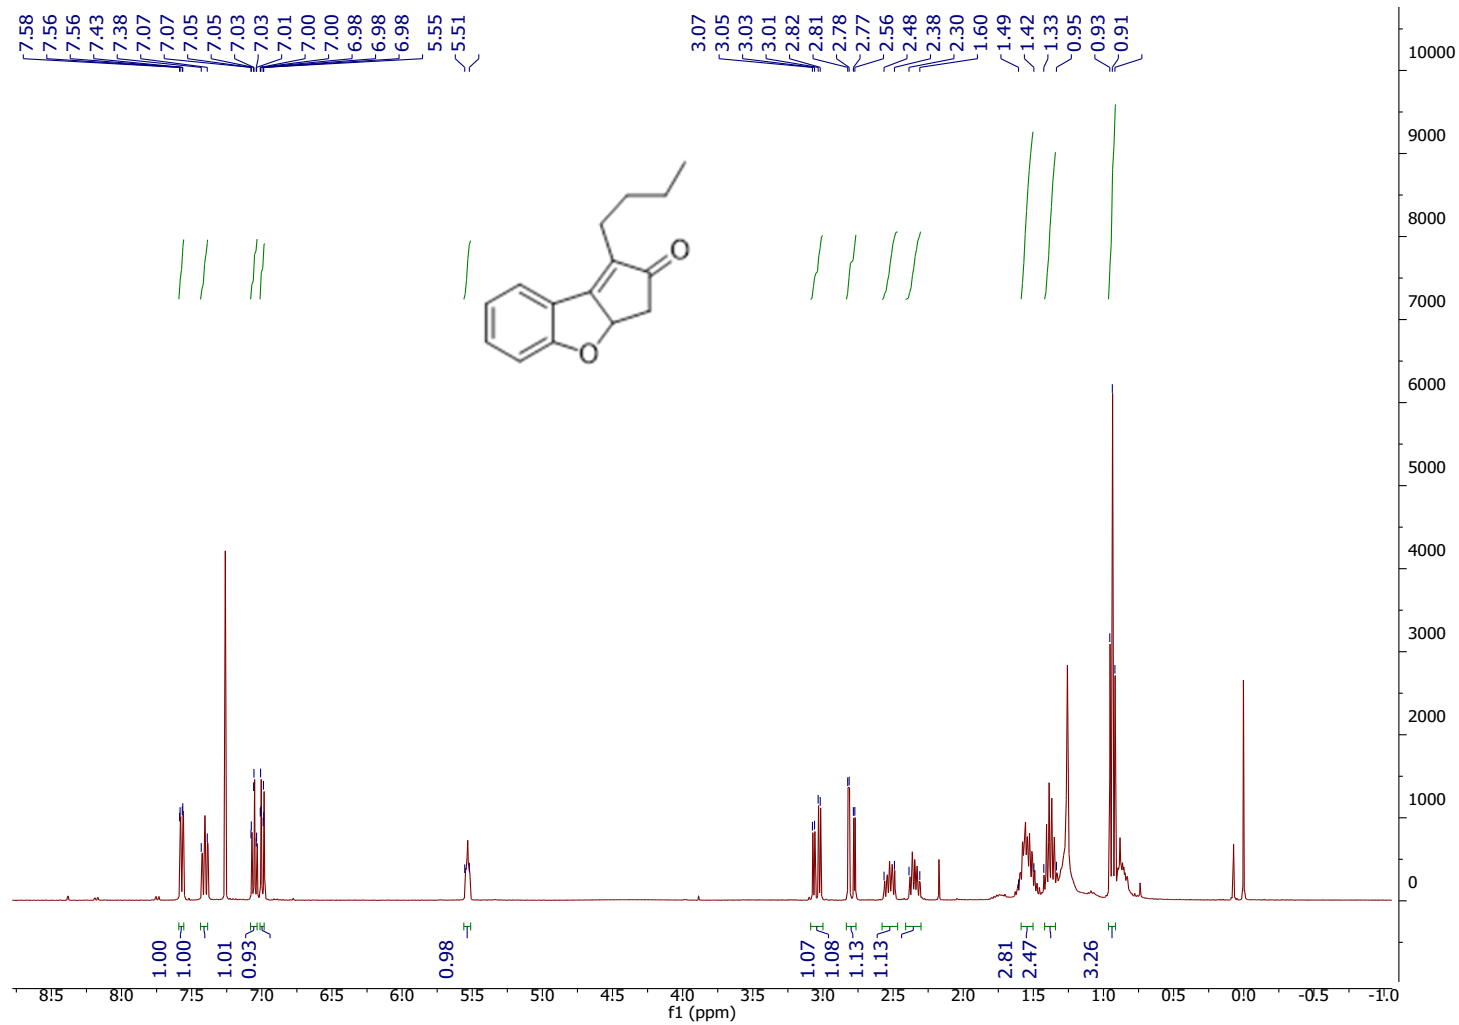



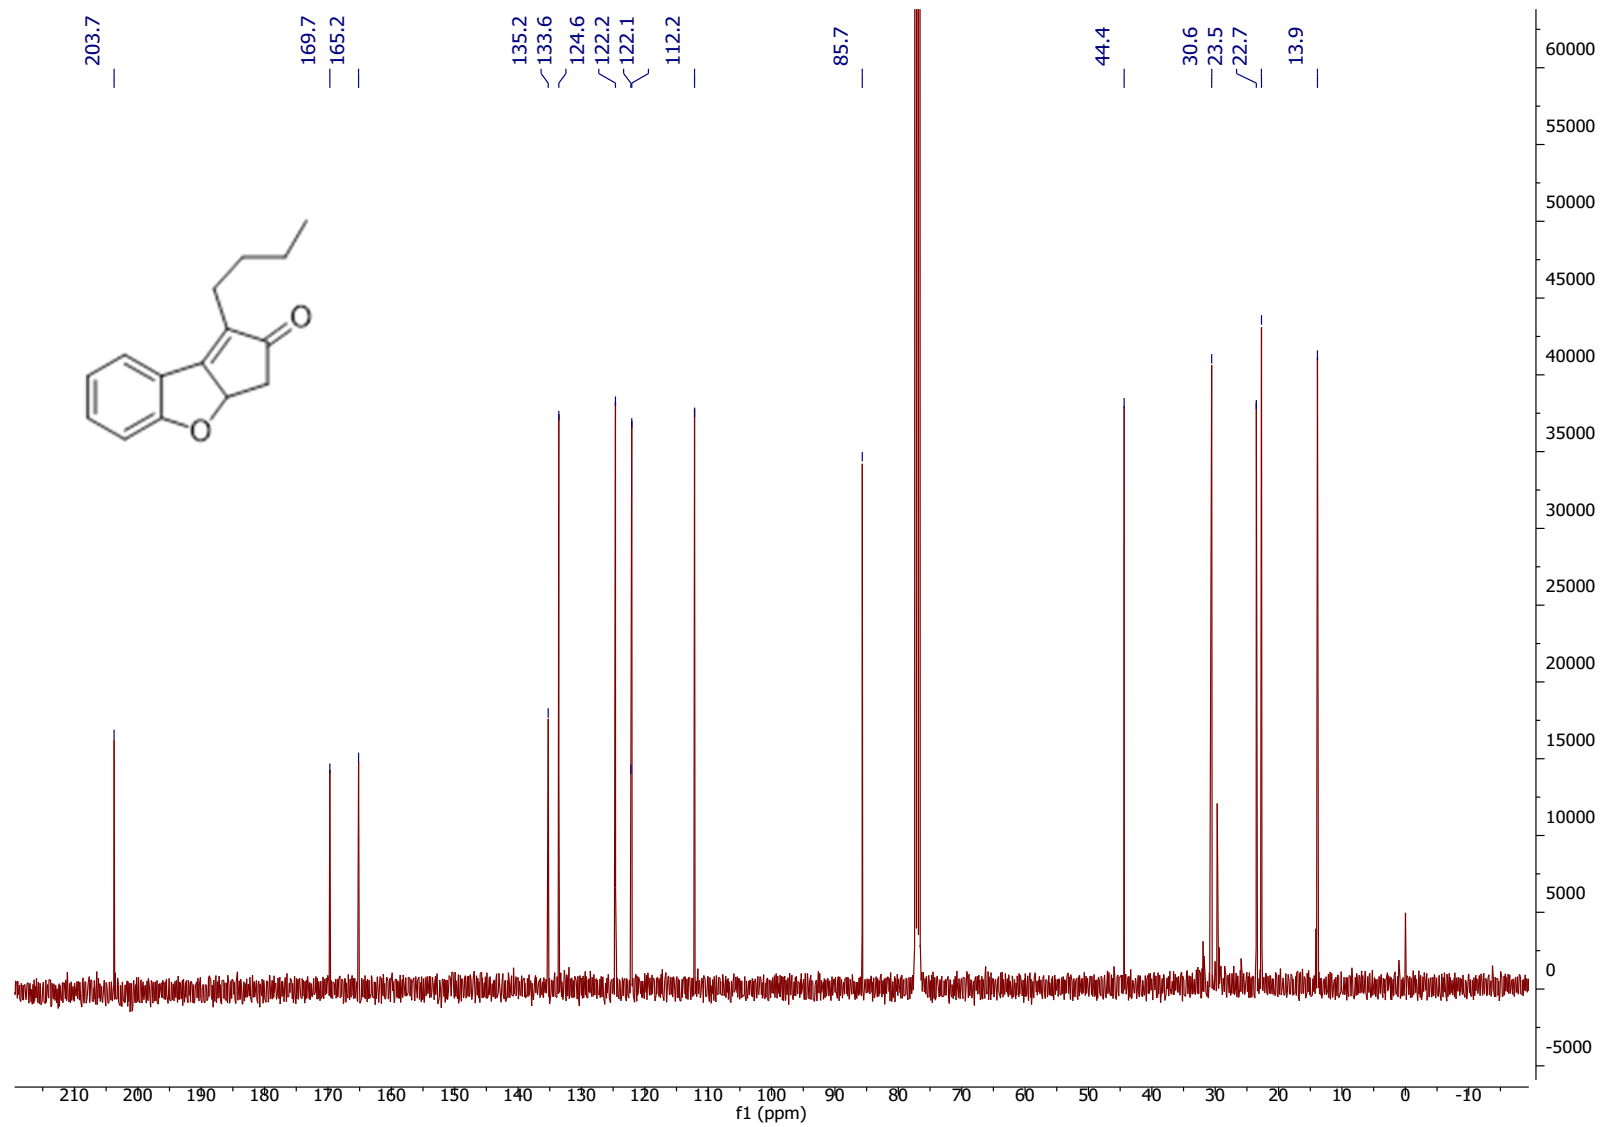

**2m:** 1-(((*tert*-butyldimethylsilyl)oxy)methyl)-3a-methyl-3,3a-dihydro-2*H*-cyclopenta[*b*]benzofuran-2-one.

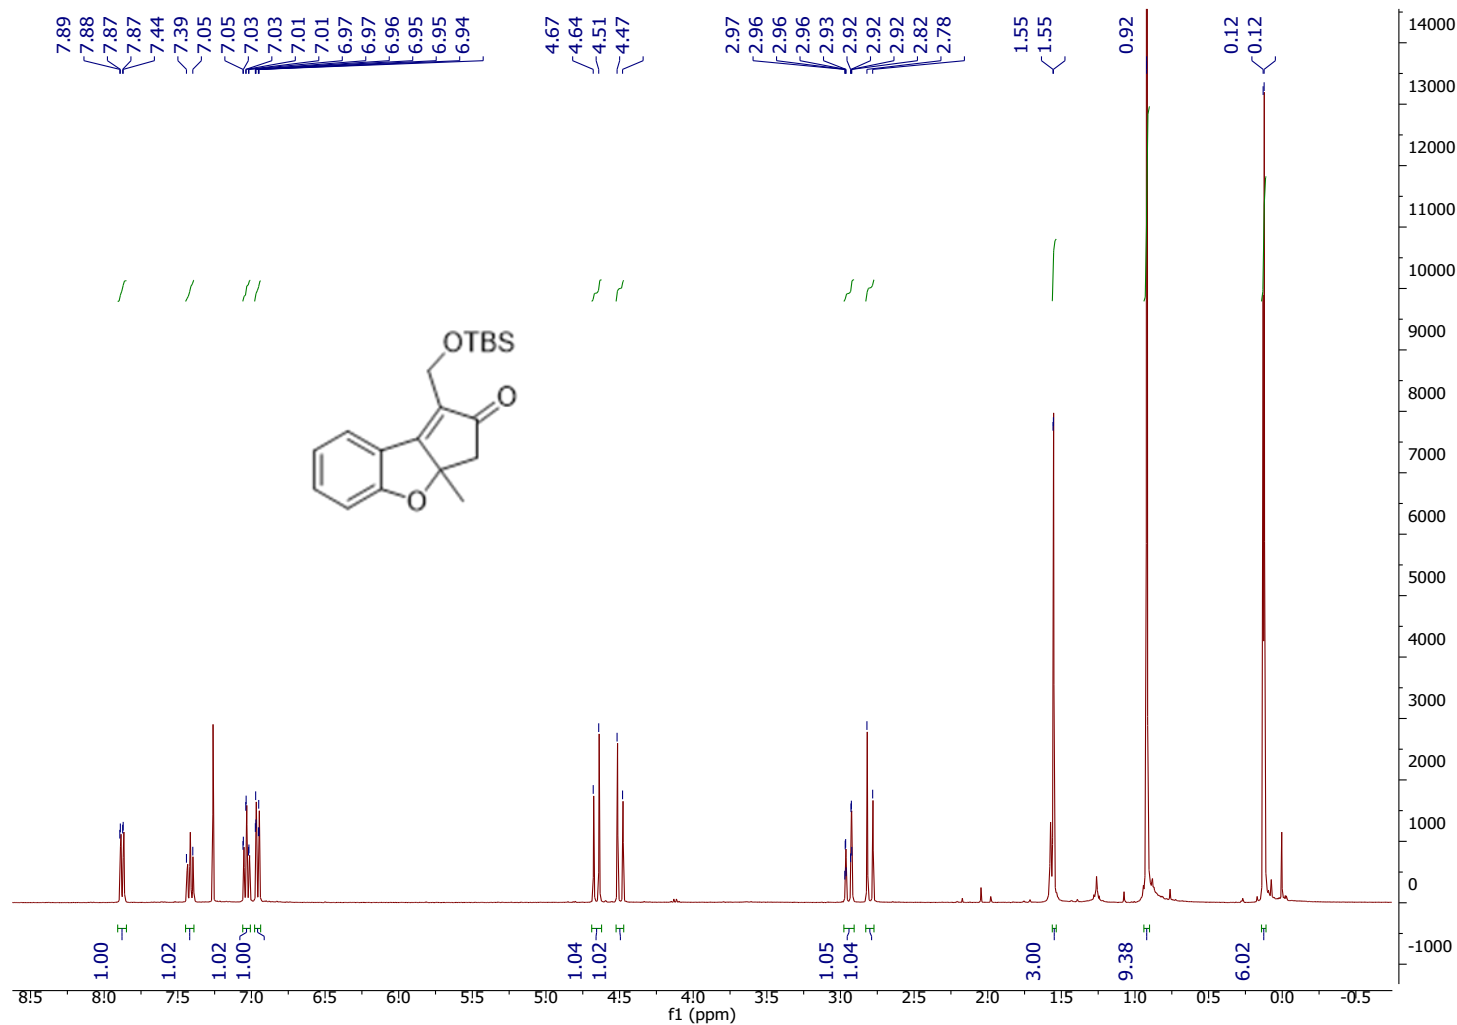

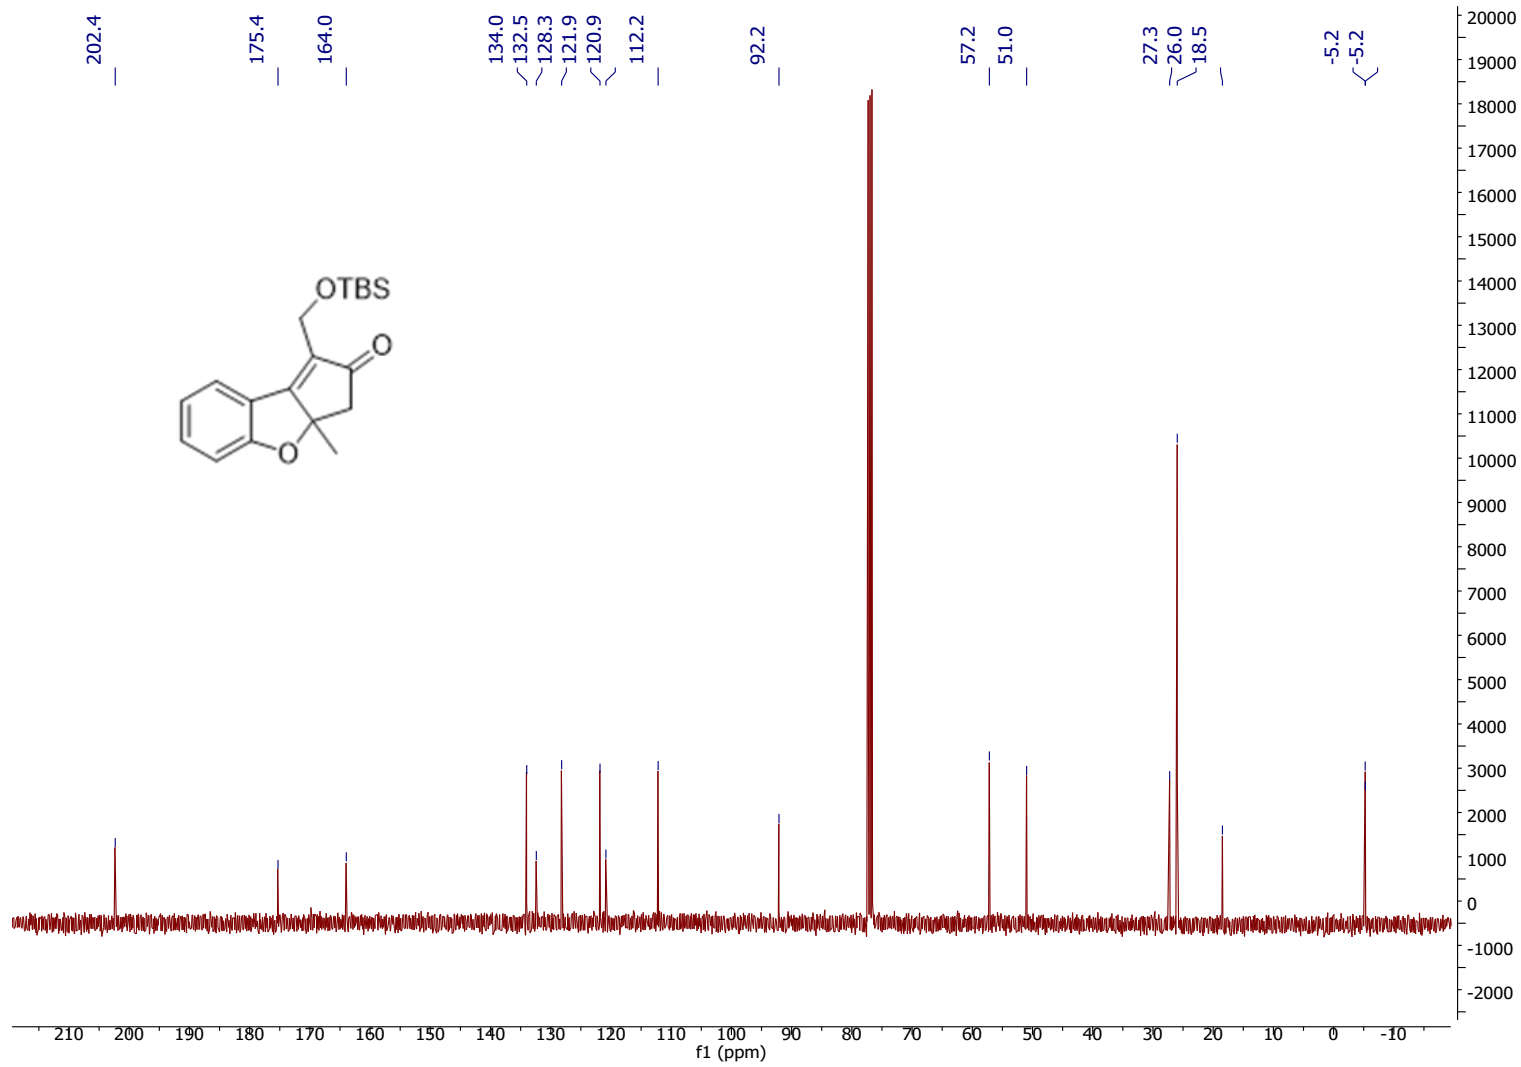

**2n:** 1-((benzyloxy)methyl)-3a-methyl-3,3a-dihydro-2H-cyclopenta[*b*]benzofuran-2-one.

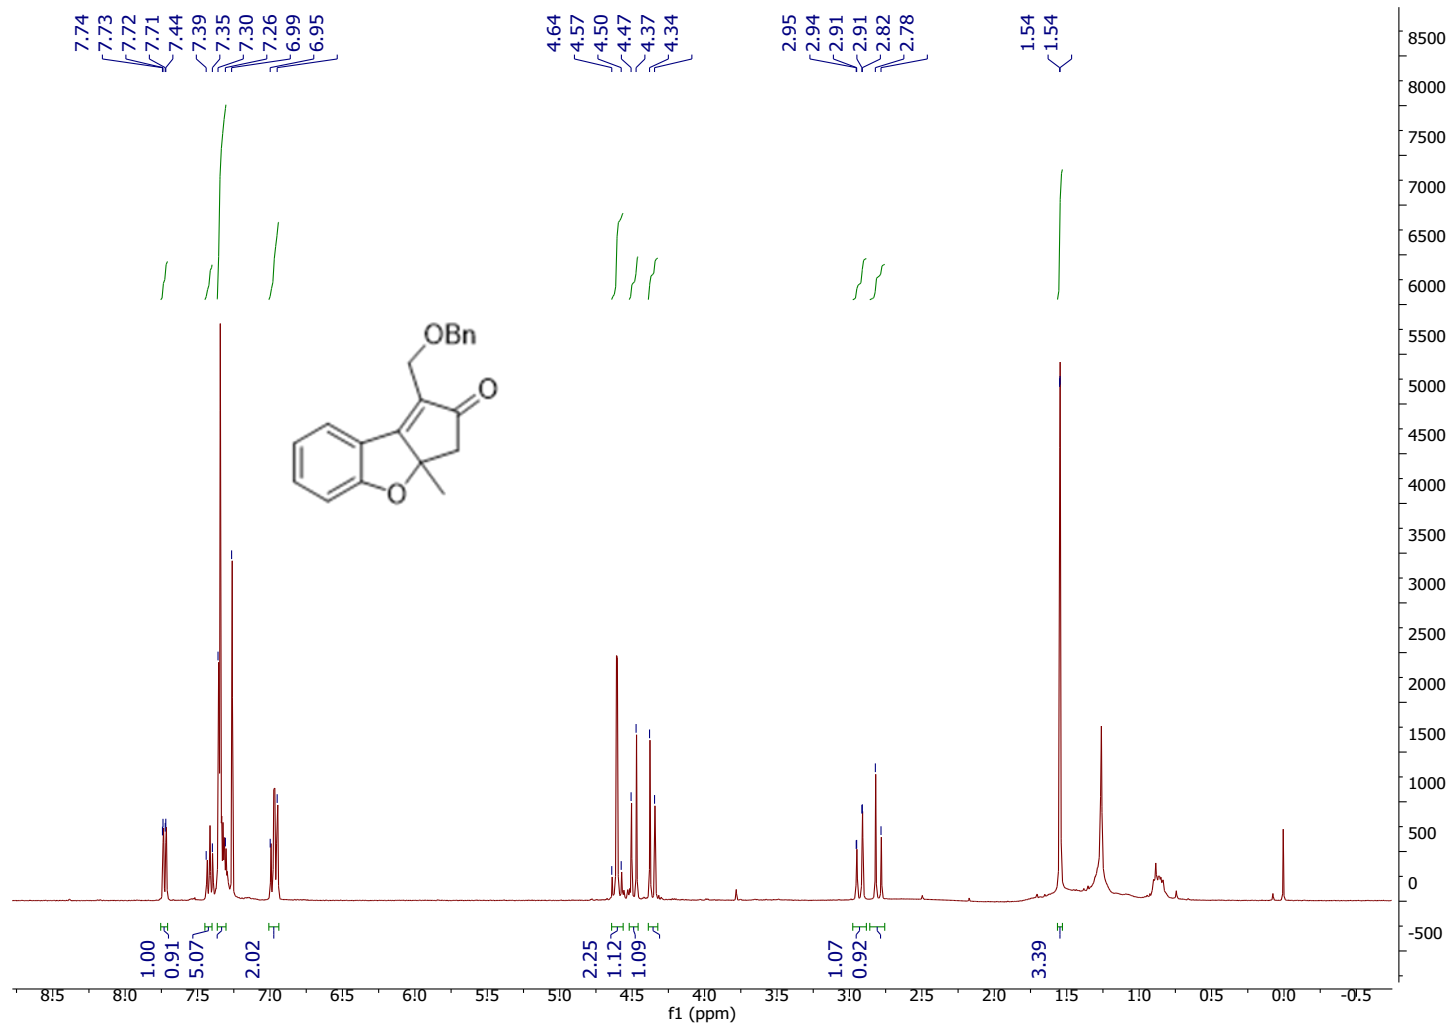

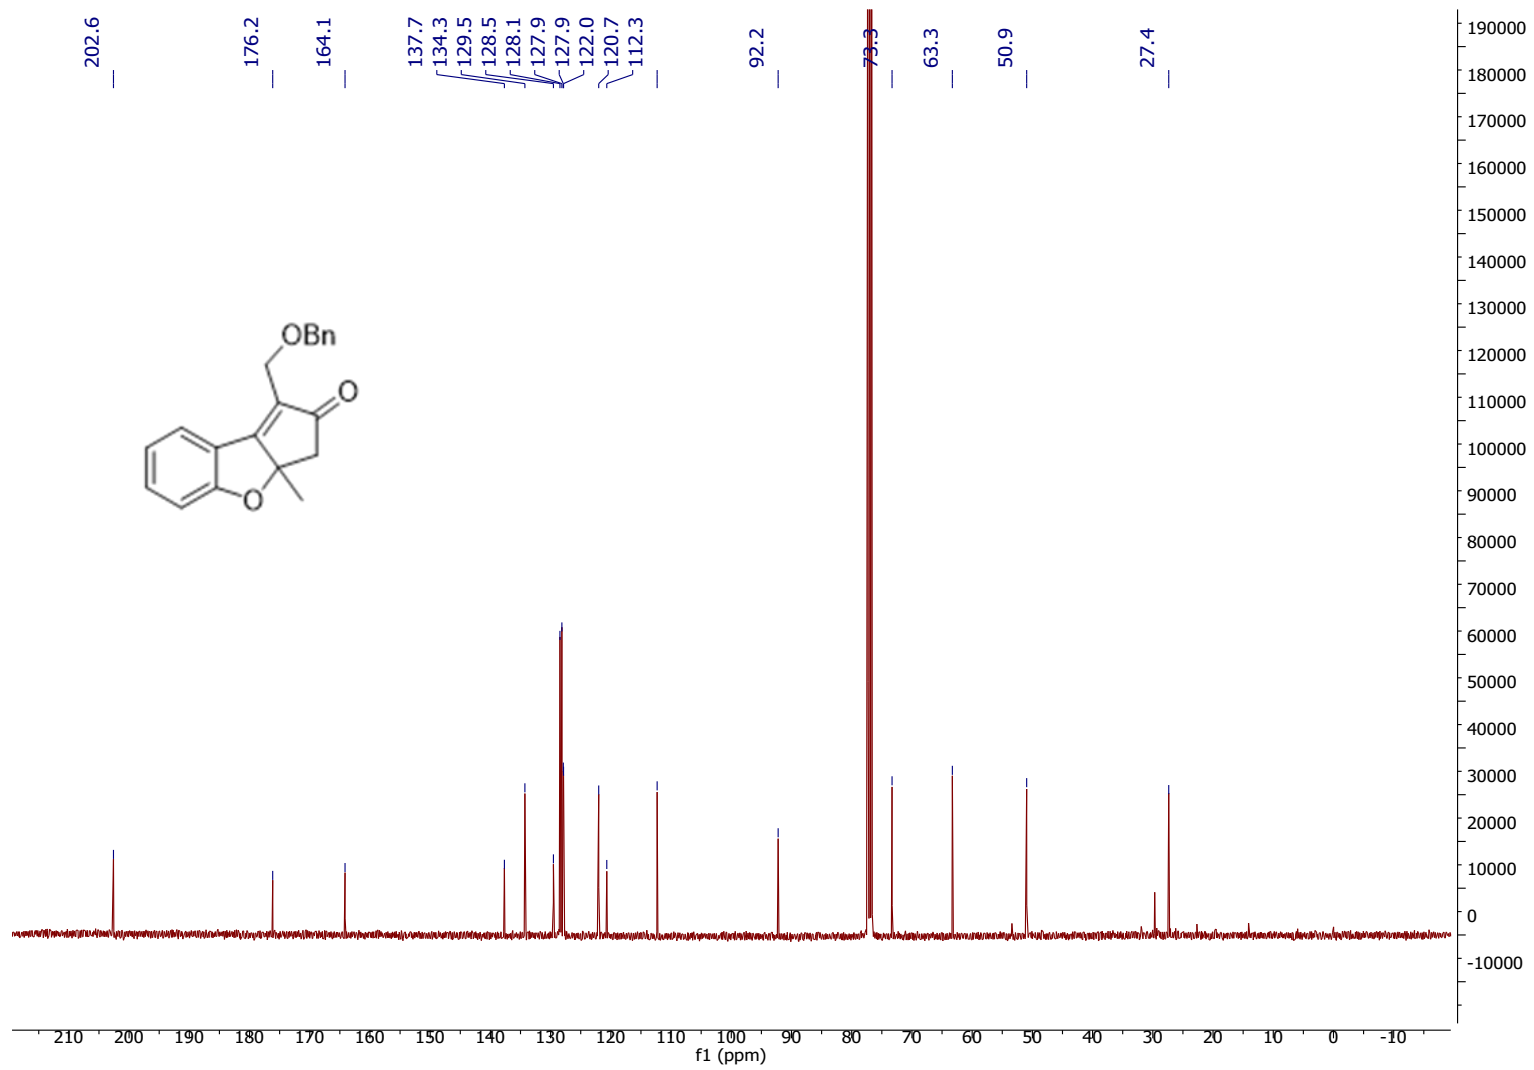

**2o:** 1-butyl-3a-methyl-3,3a-dihydro-2H-cyclopenta[b]benzofuran-2-one.

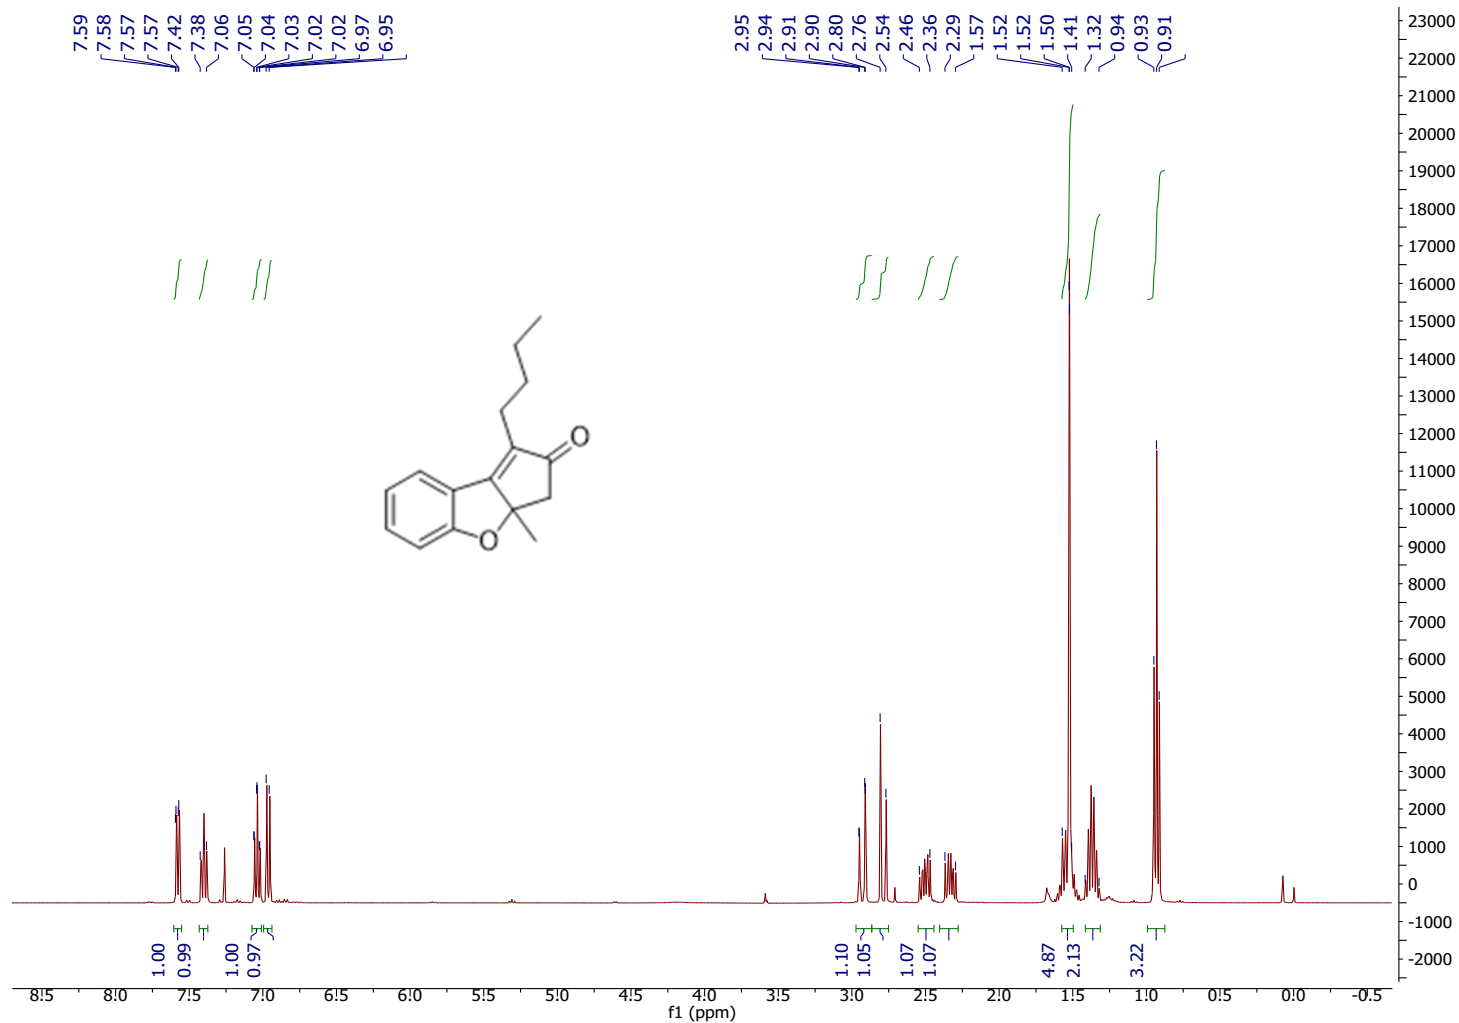

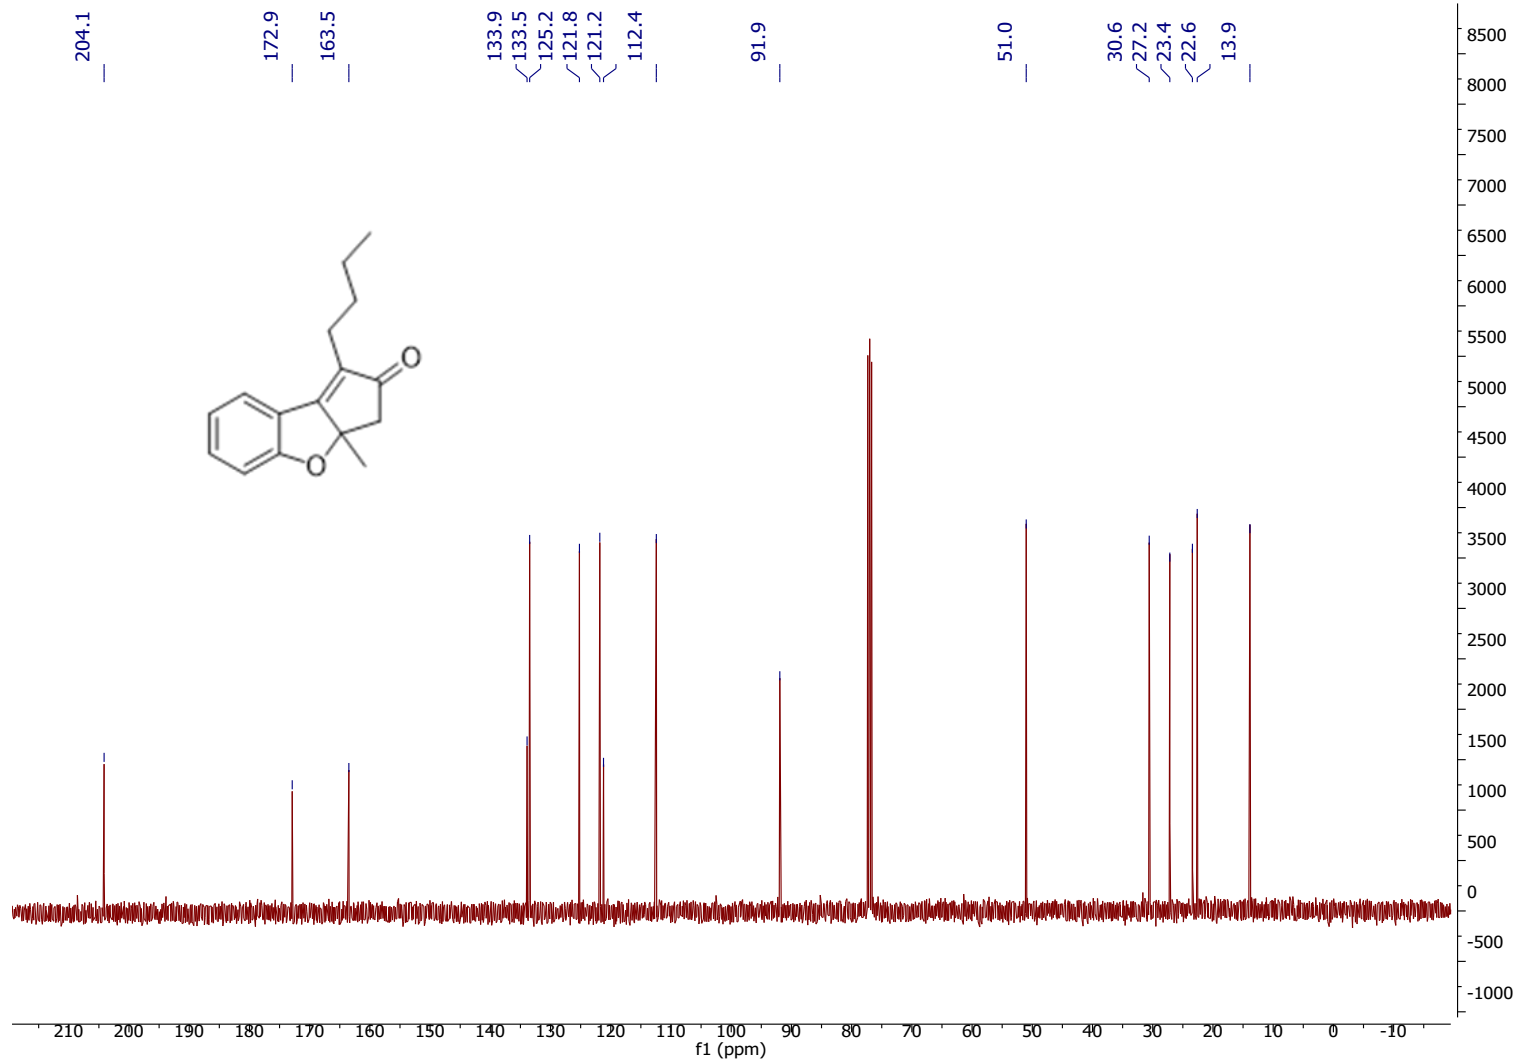

**2p:** 2-(2-(3a-methyl-2-oxo-3,3a-dihydro-2H-cyclopenta[b]benzofuran-1-yl)ethyl)isoindoline-1,3-dione.

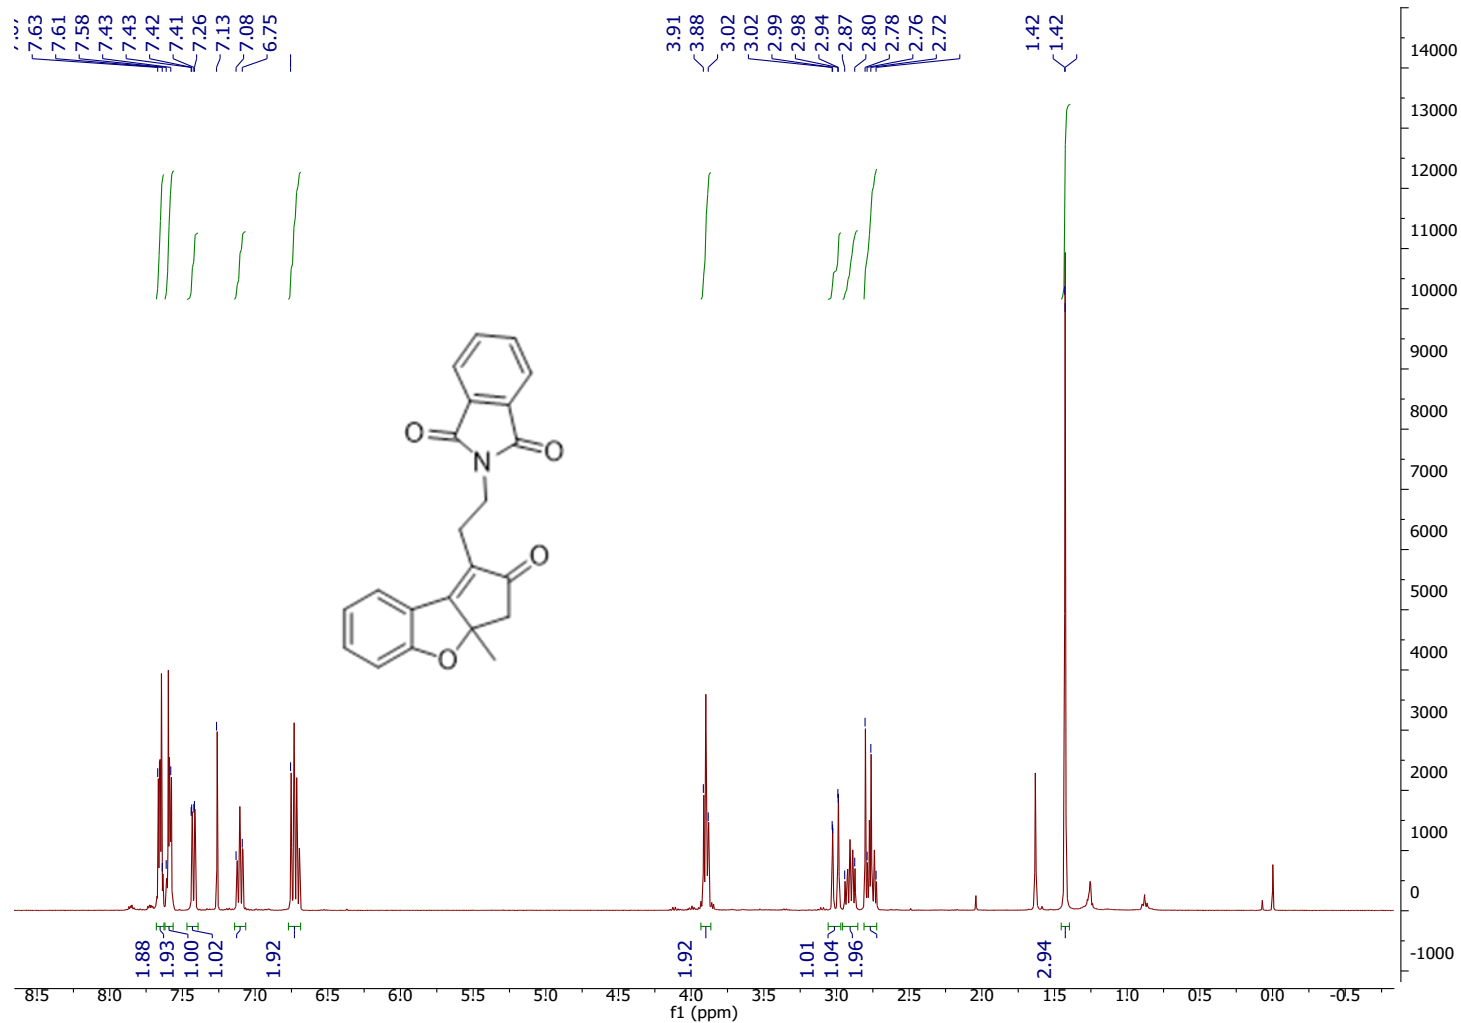



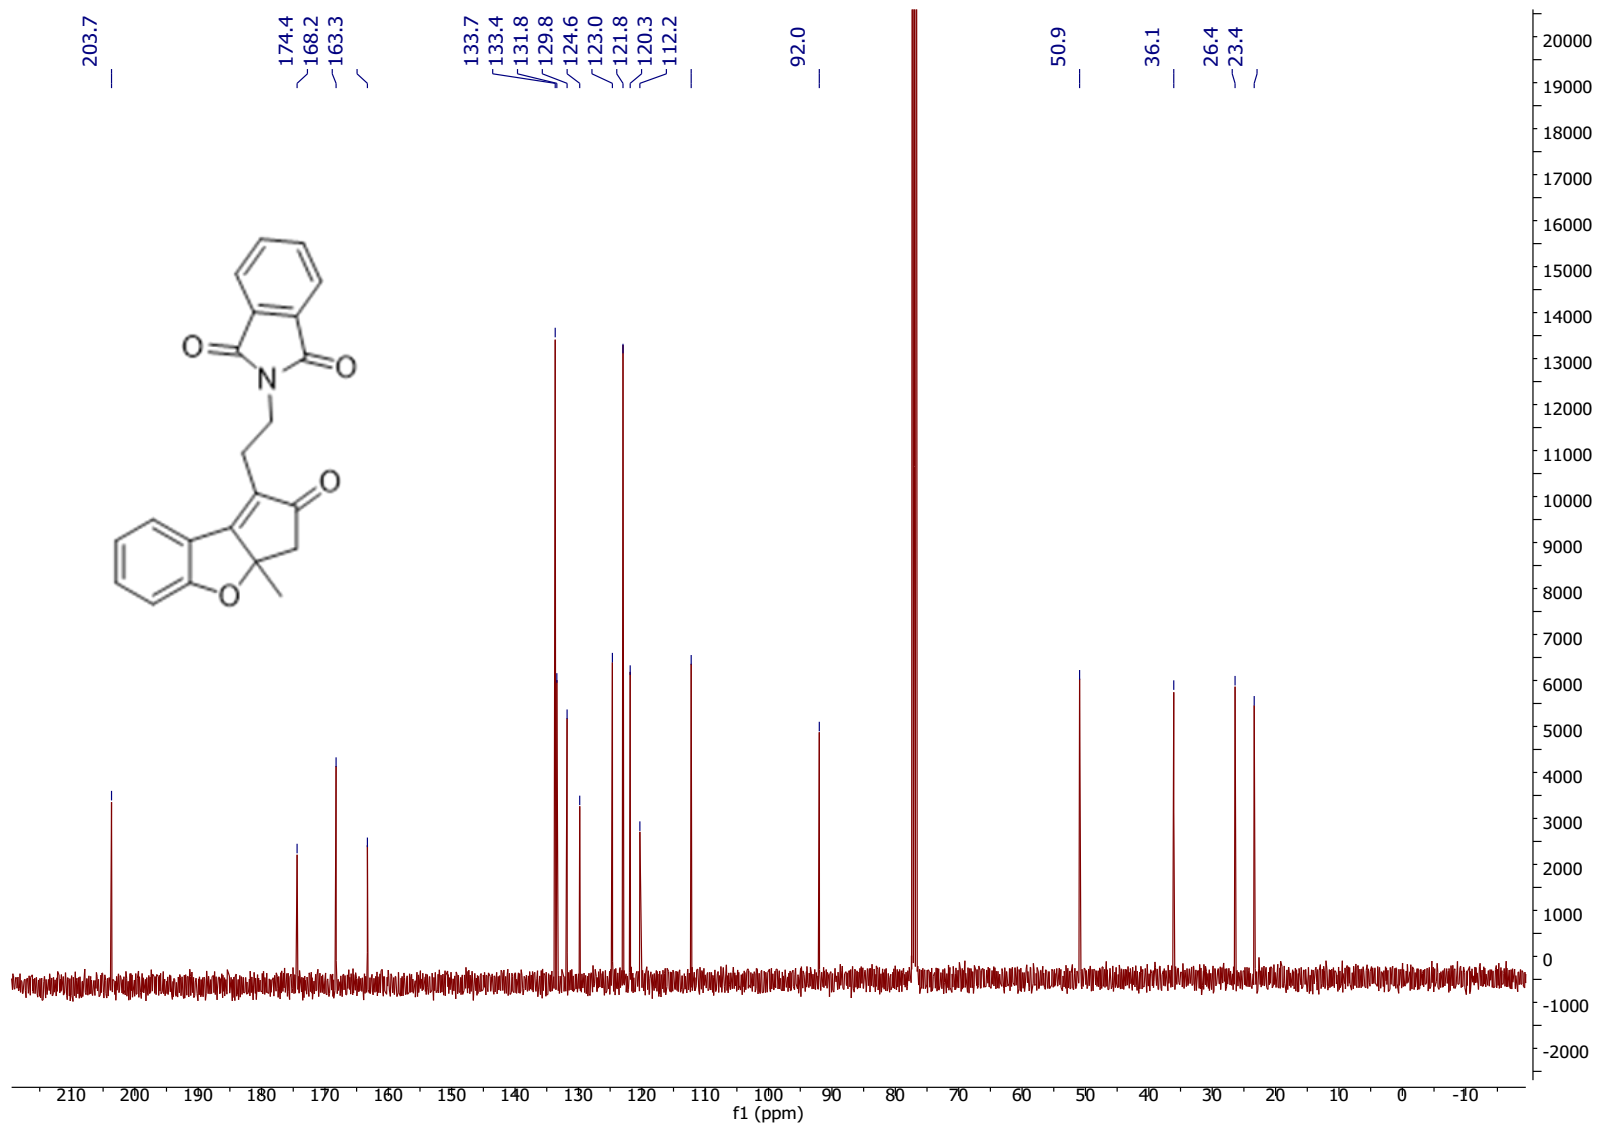

2q:1-(((*tert*-butyldimethylsilyl)oxy)methyl)-7-methoxy-3a-methyl-3,3a-dihydro-2*H*-cyclopenta[*b*]benzofuran-2-one.

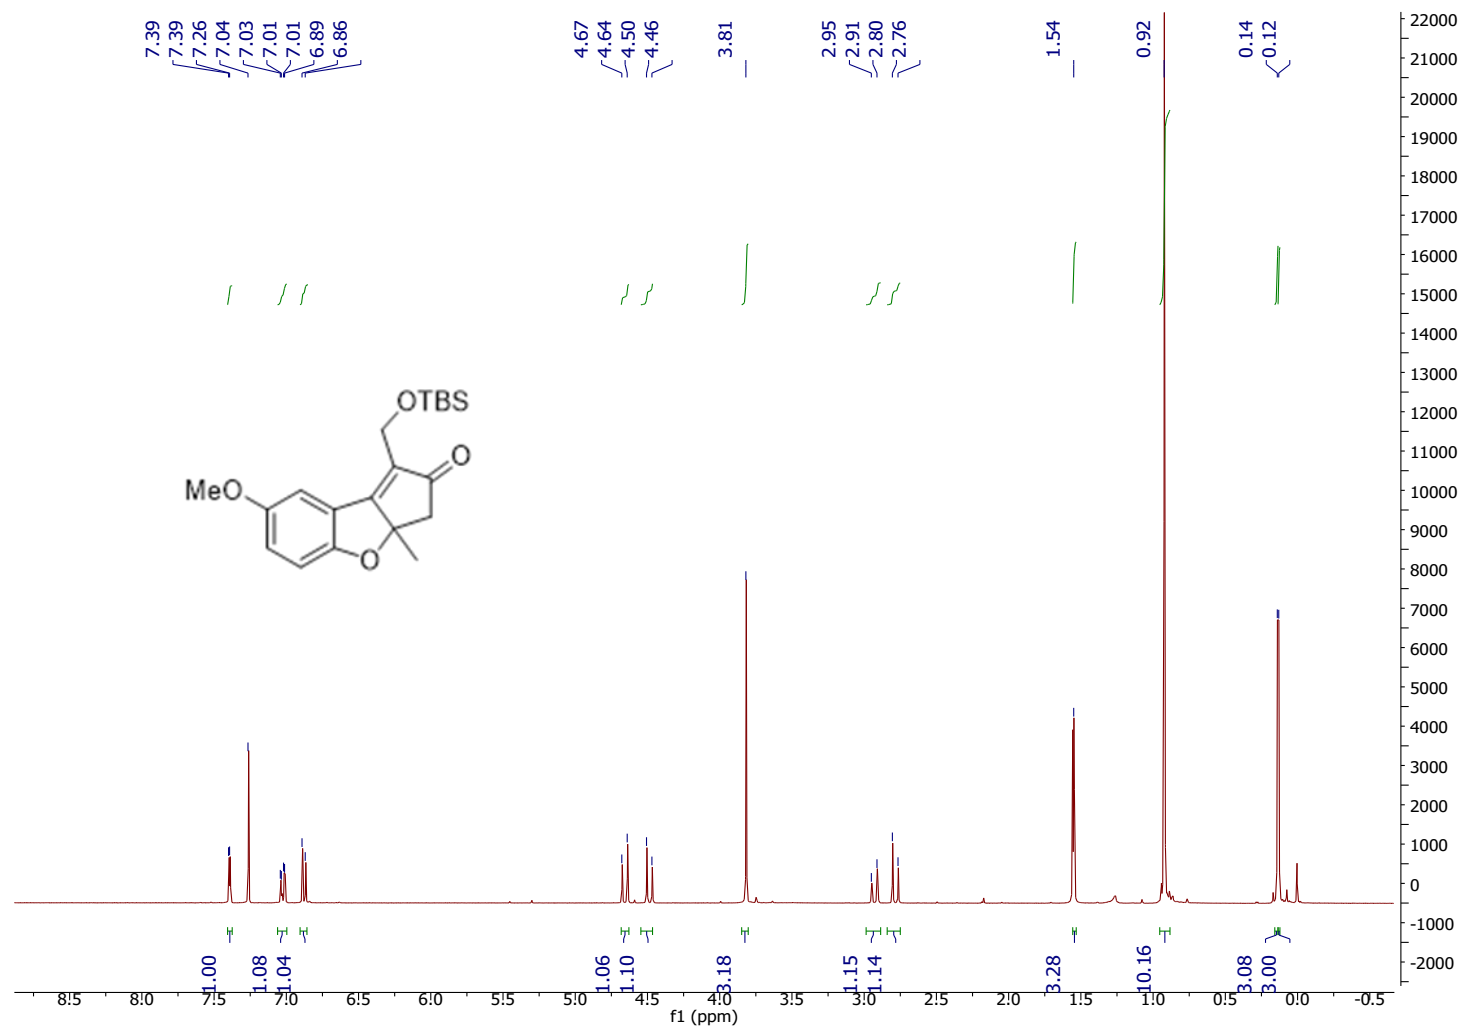

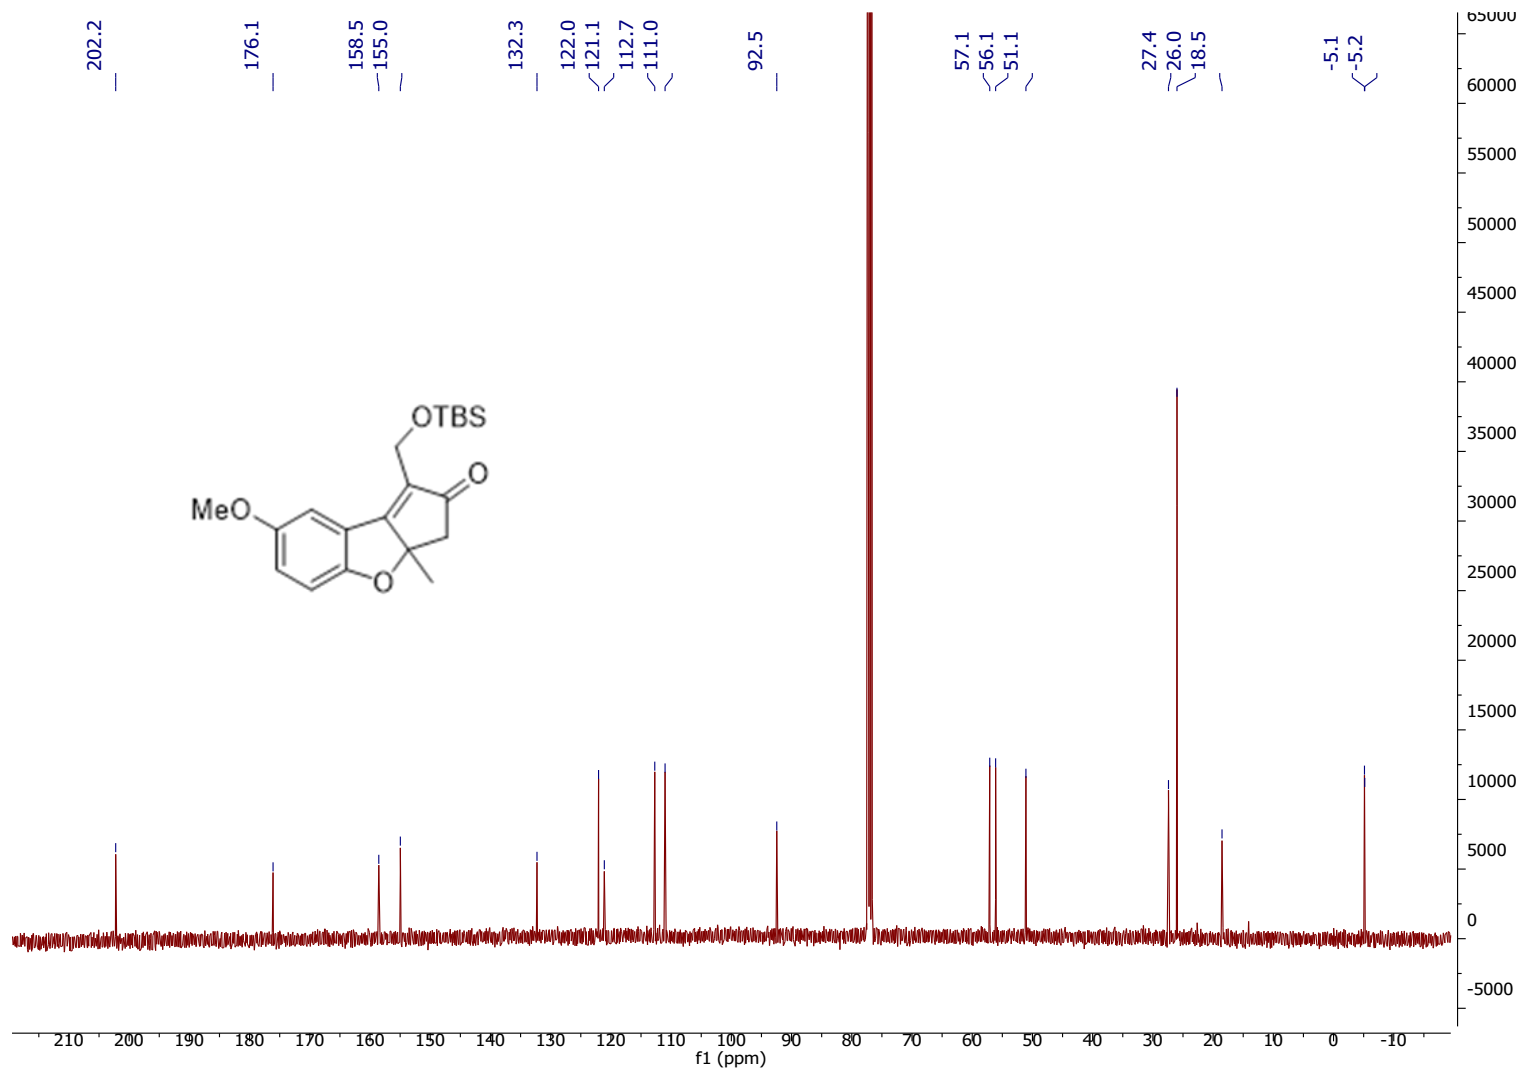

**2r:** 1-(2-bromoethyl)-3a-methyl-3,3a-dihydro-2H-cyclopenta[b]benzofuran-2-one

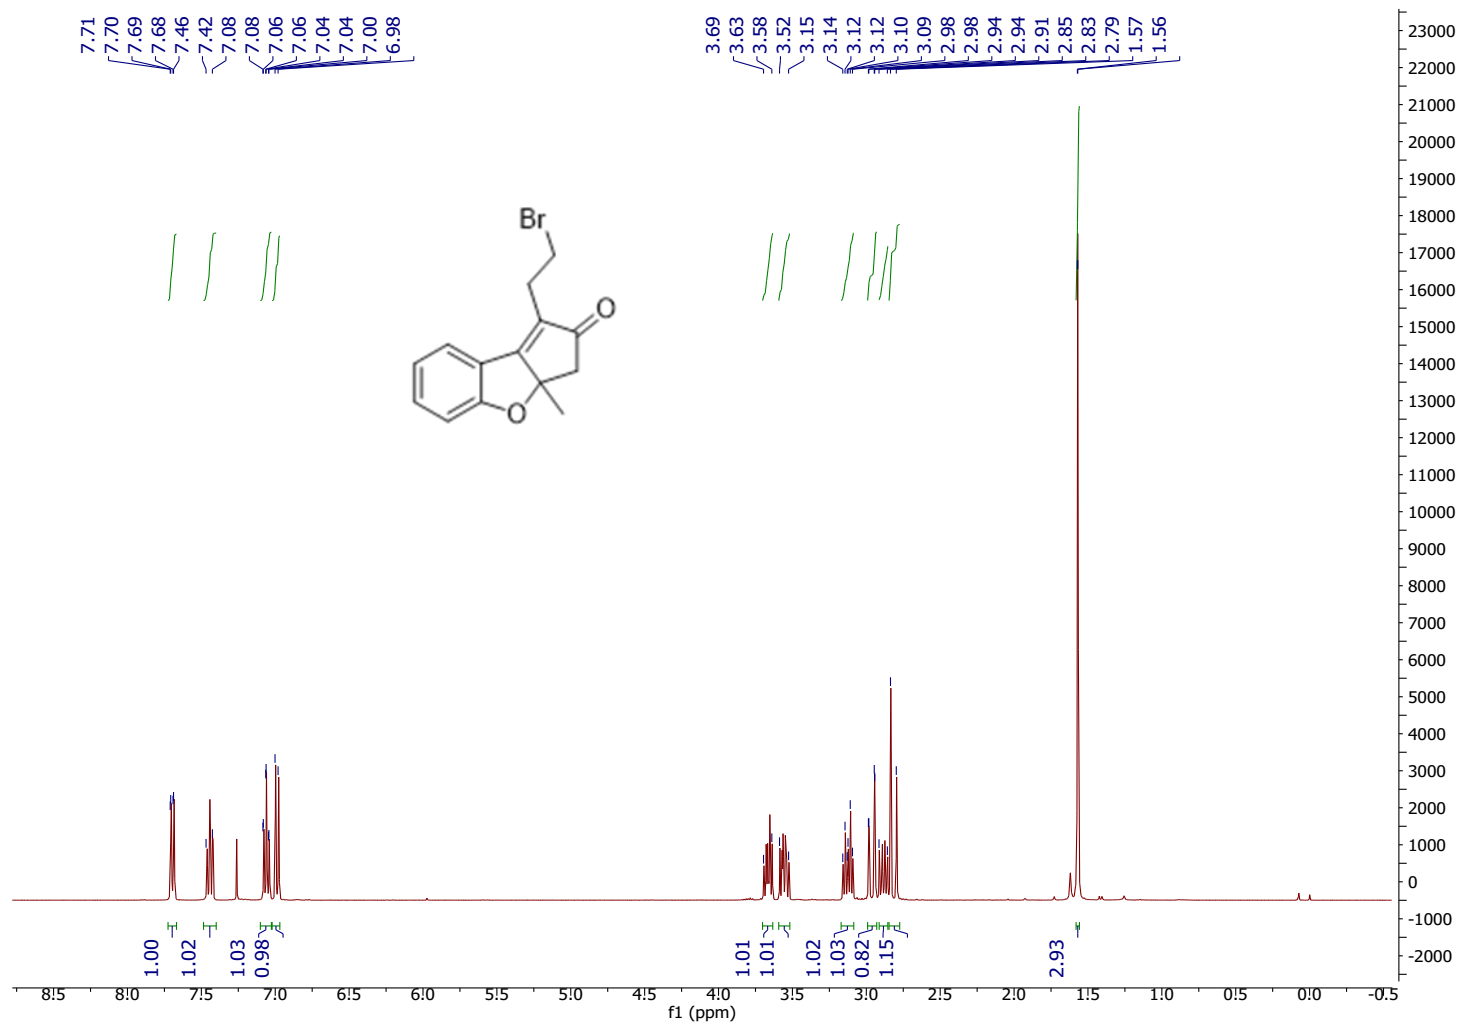

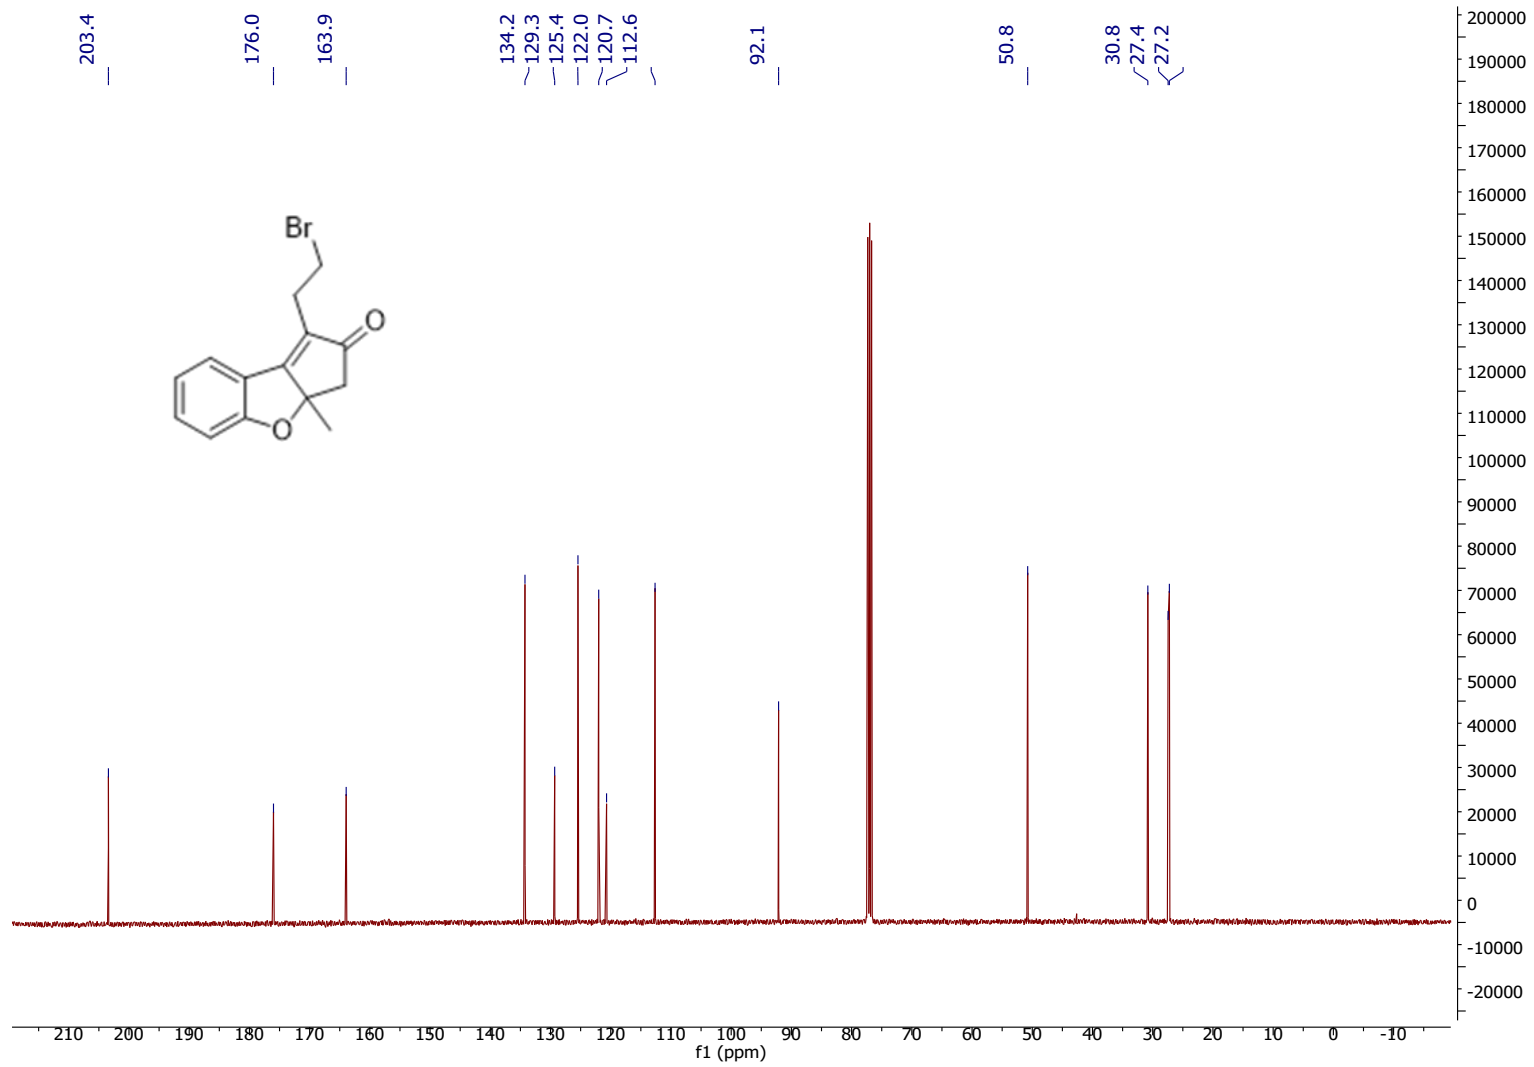

**2s:** 1-(((*tert*-butyldimethylsilyl)oxy)methyl)-7-fluoro-3a-methyl-3,3a-dihydro-2*H*-cyclopenta[*b*]benzofuran-2-one.

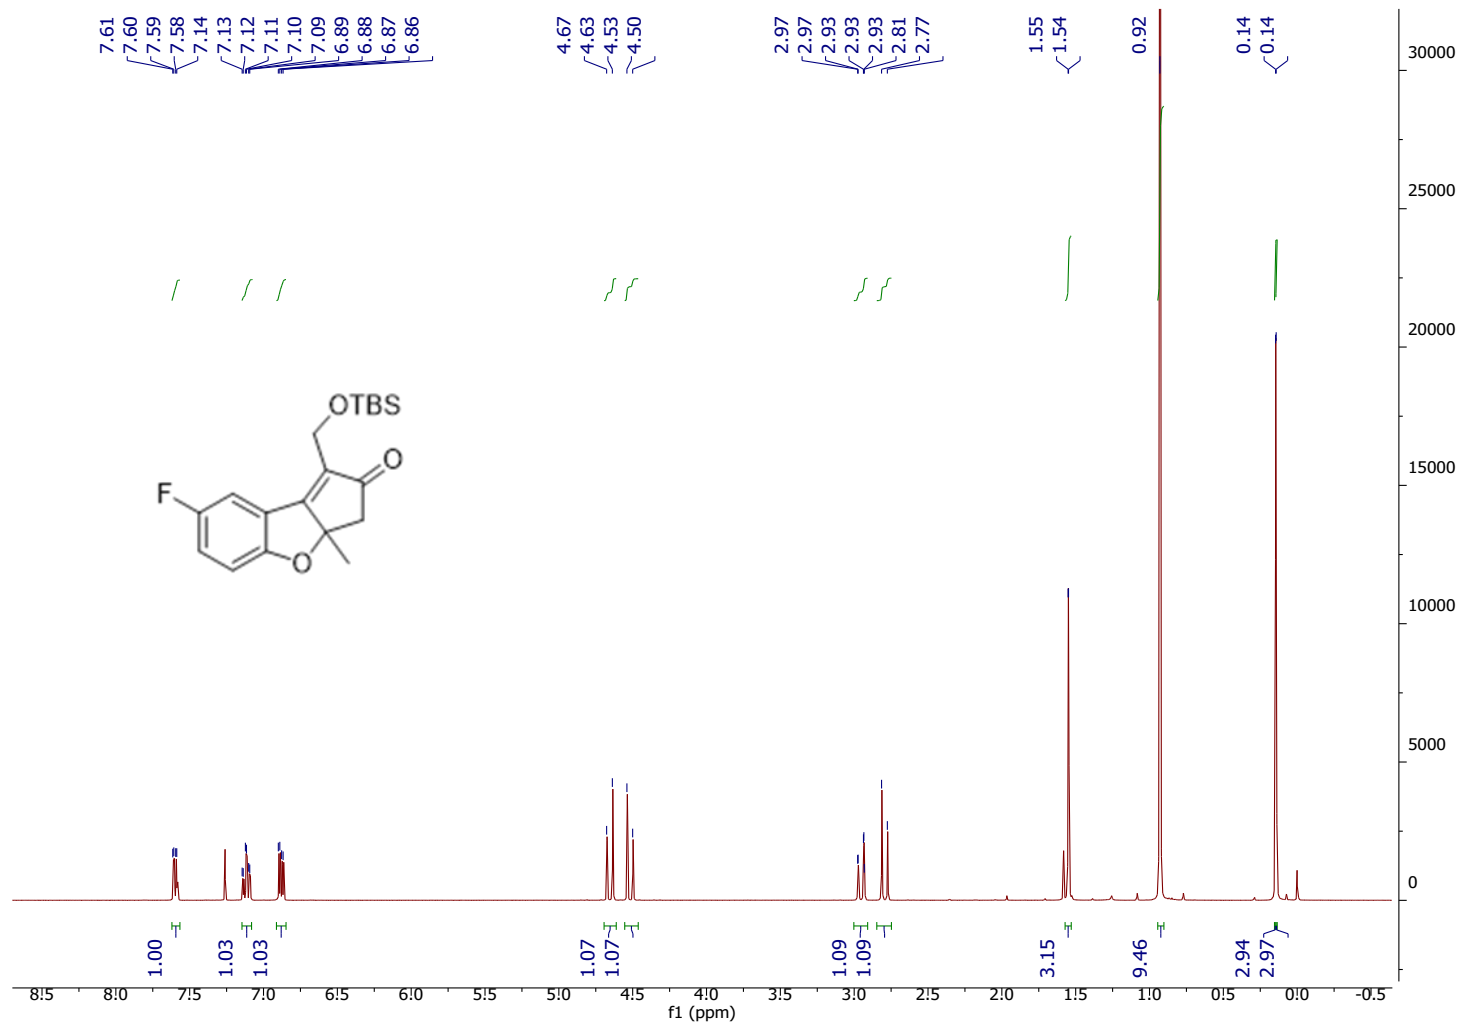

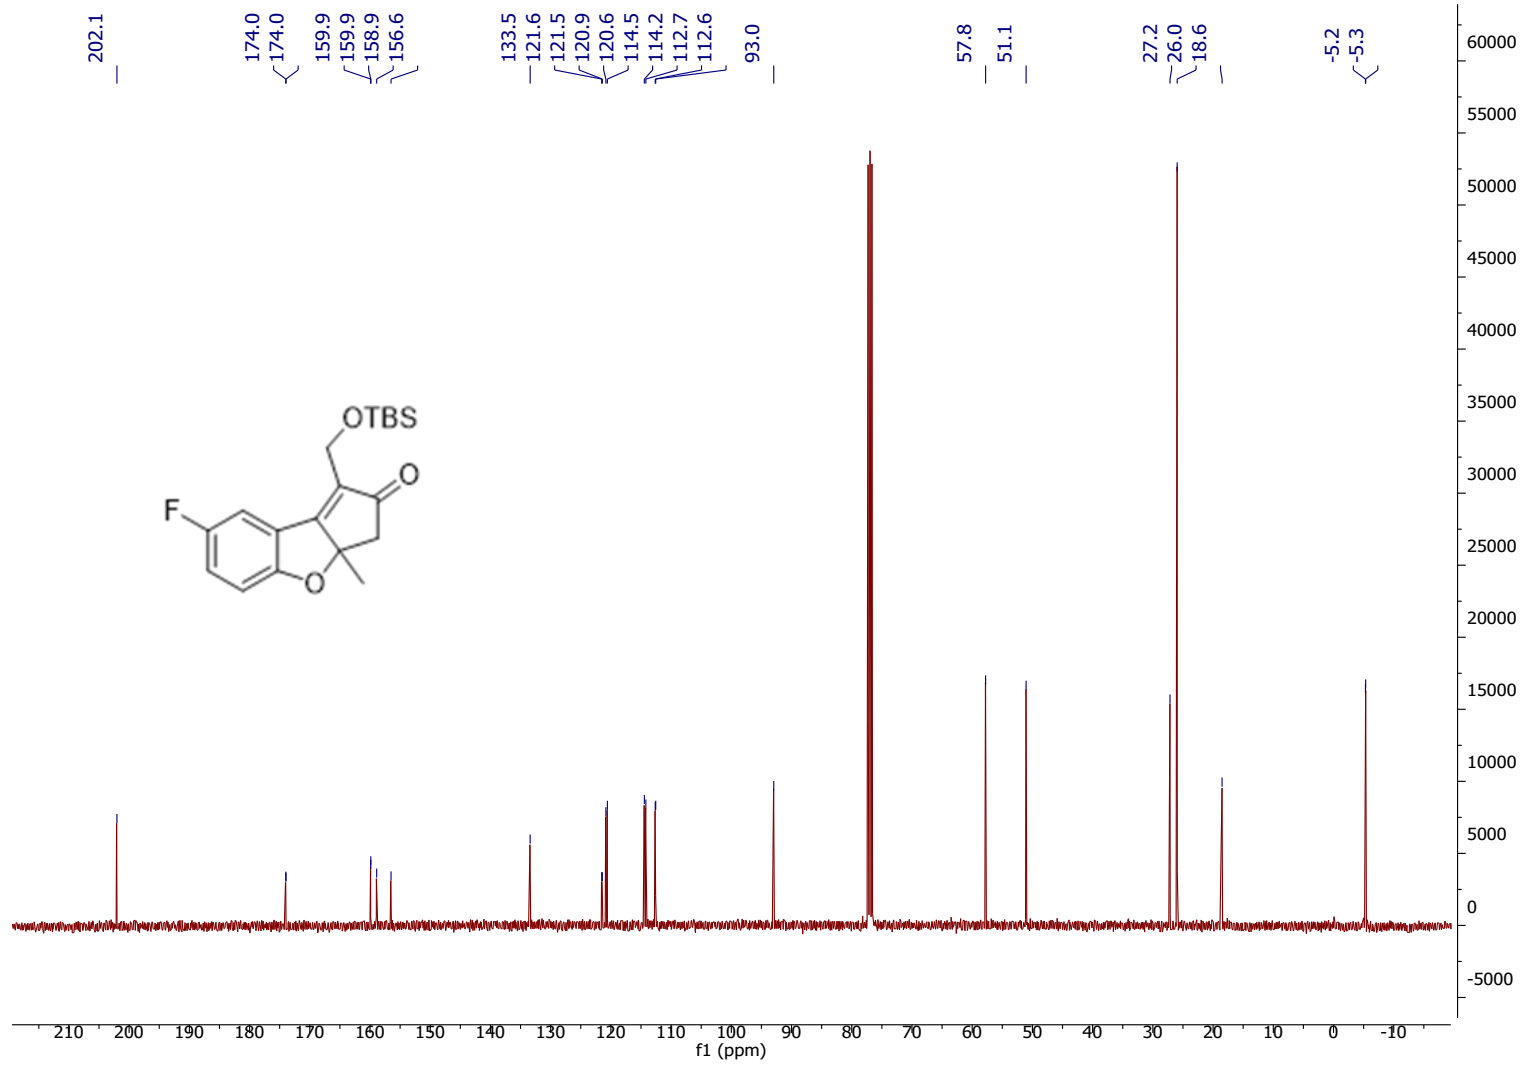

4a: 3-(2-(vinylloxy)phenyl)dibenzo[b,d]furan

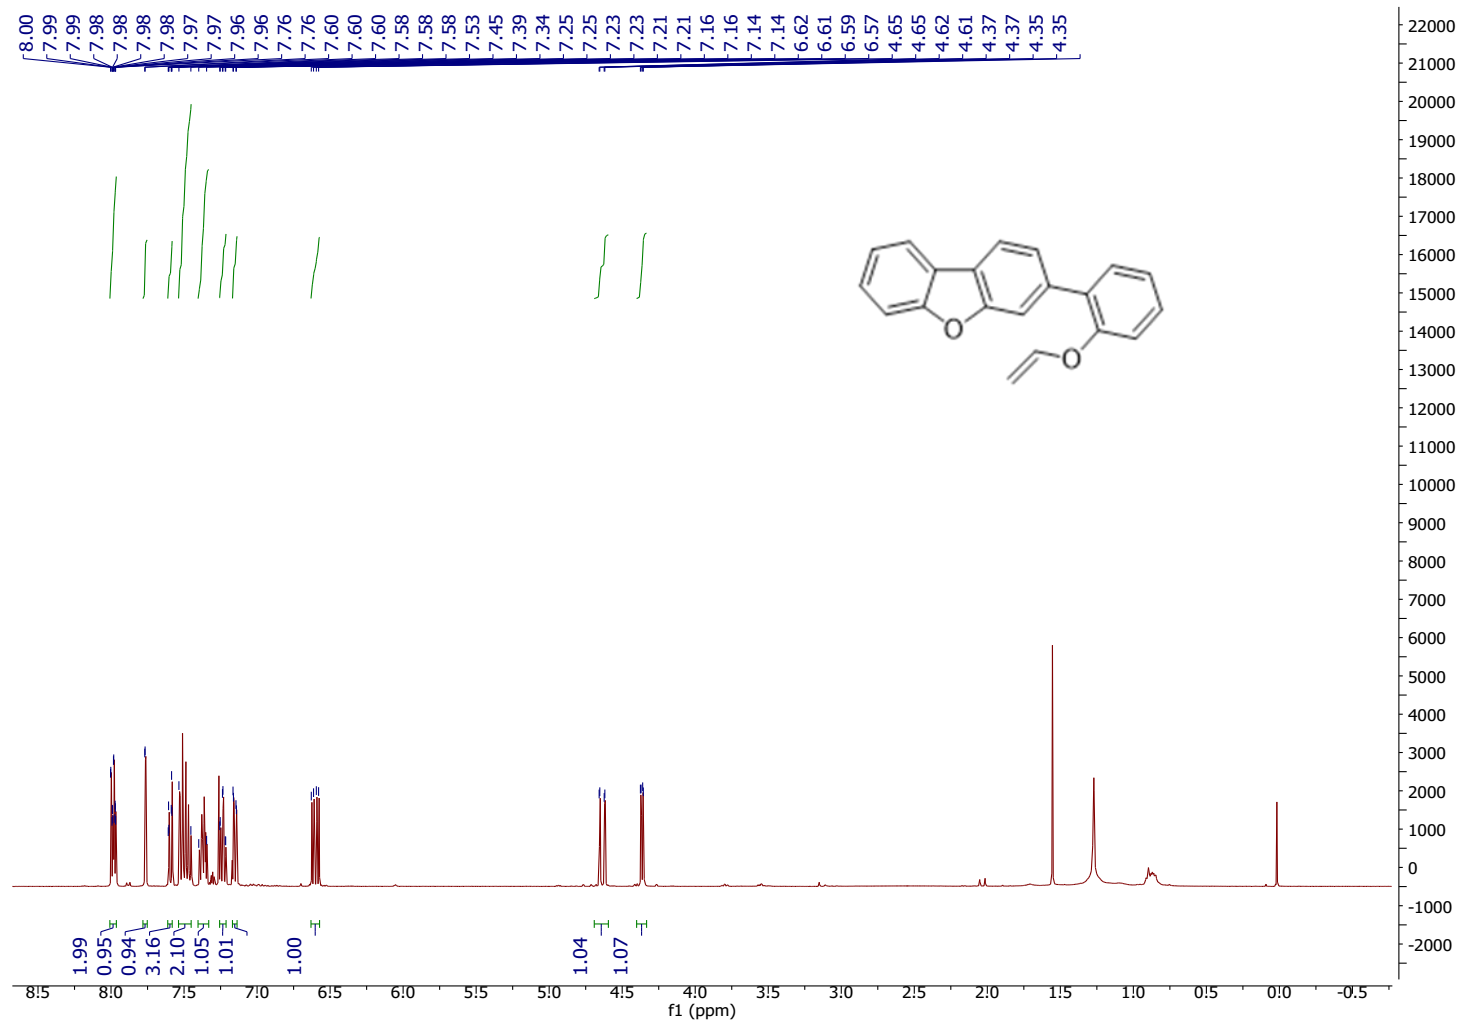



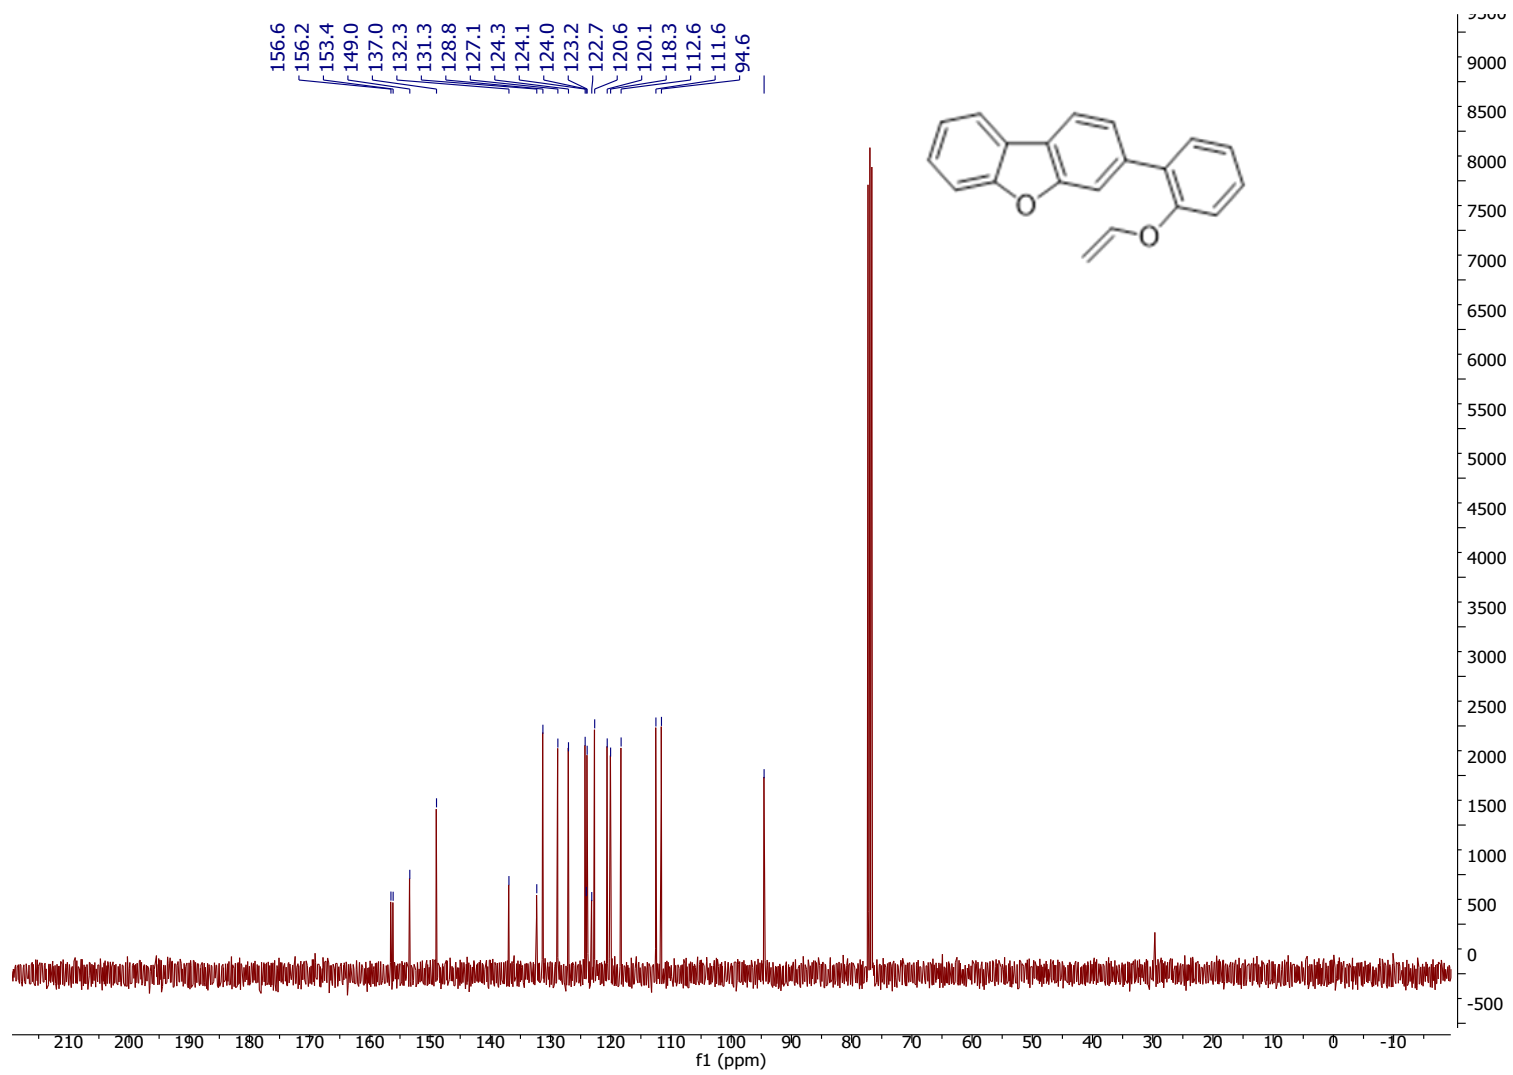

**4k: (E)-4-methyl-3-(2-(prop-1-en-1-yloxy)phenyl)dibenzo[b,d]furan**

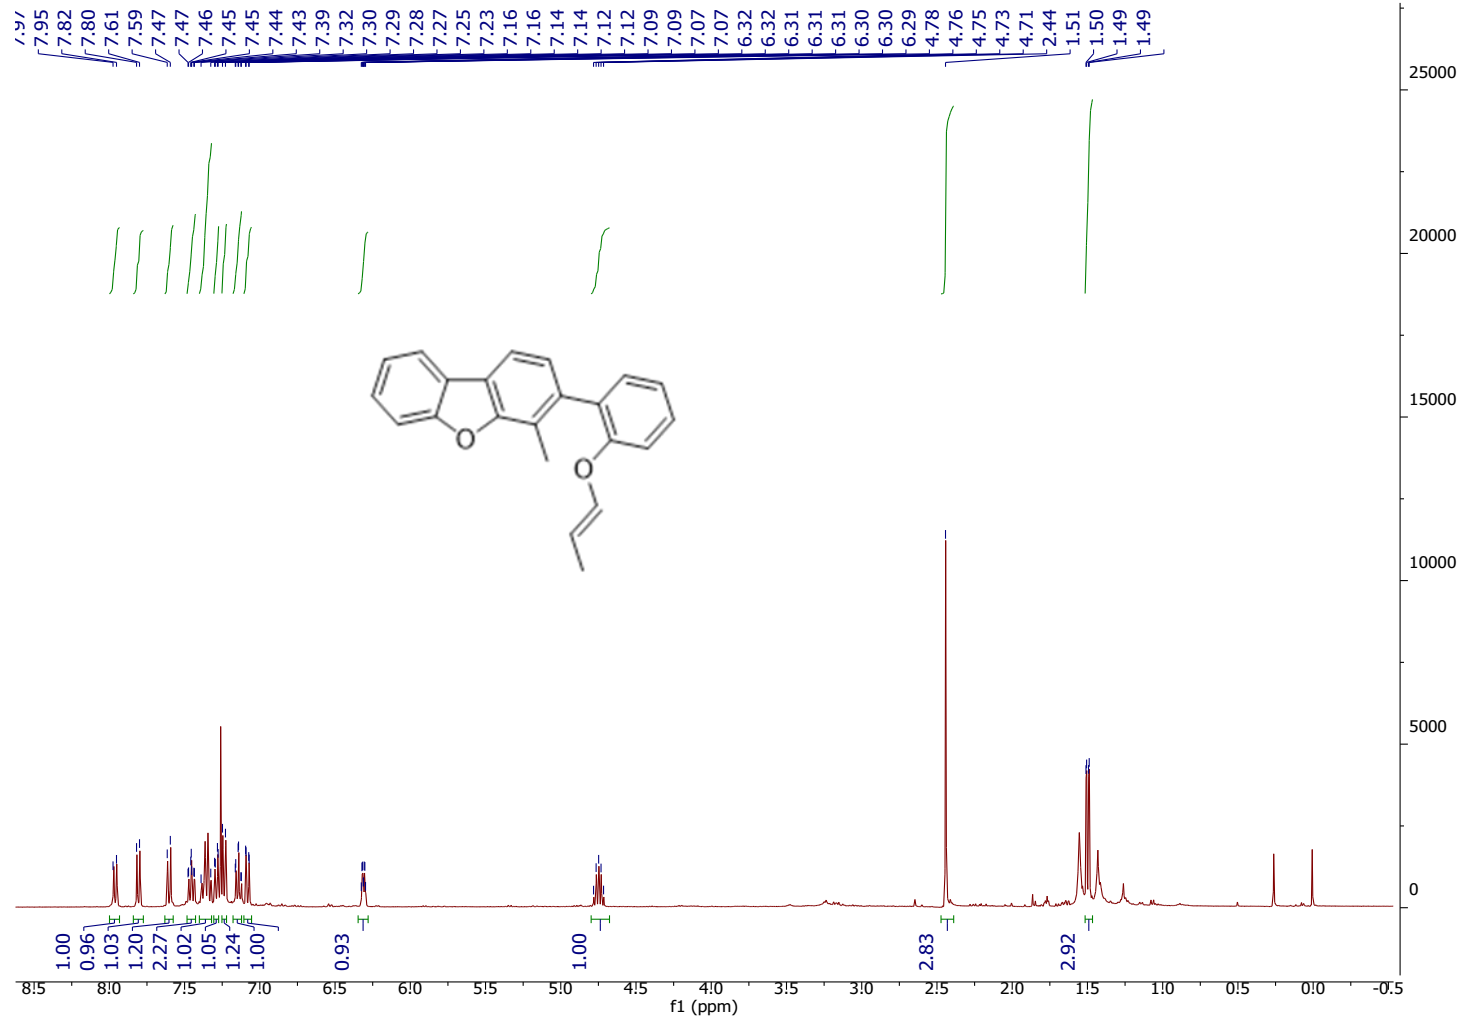

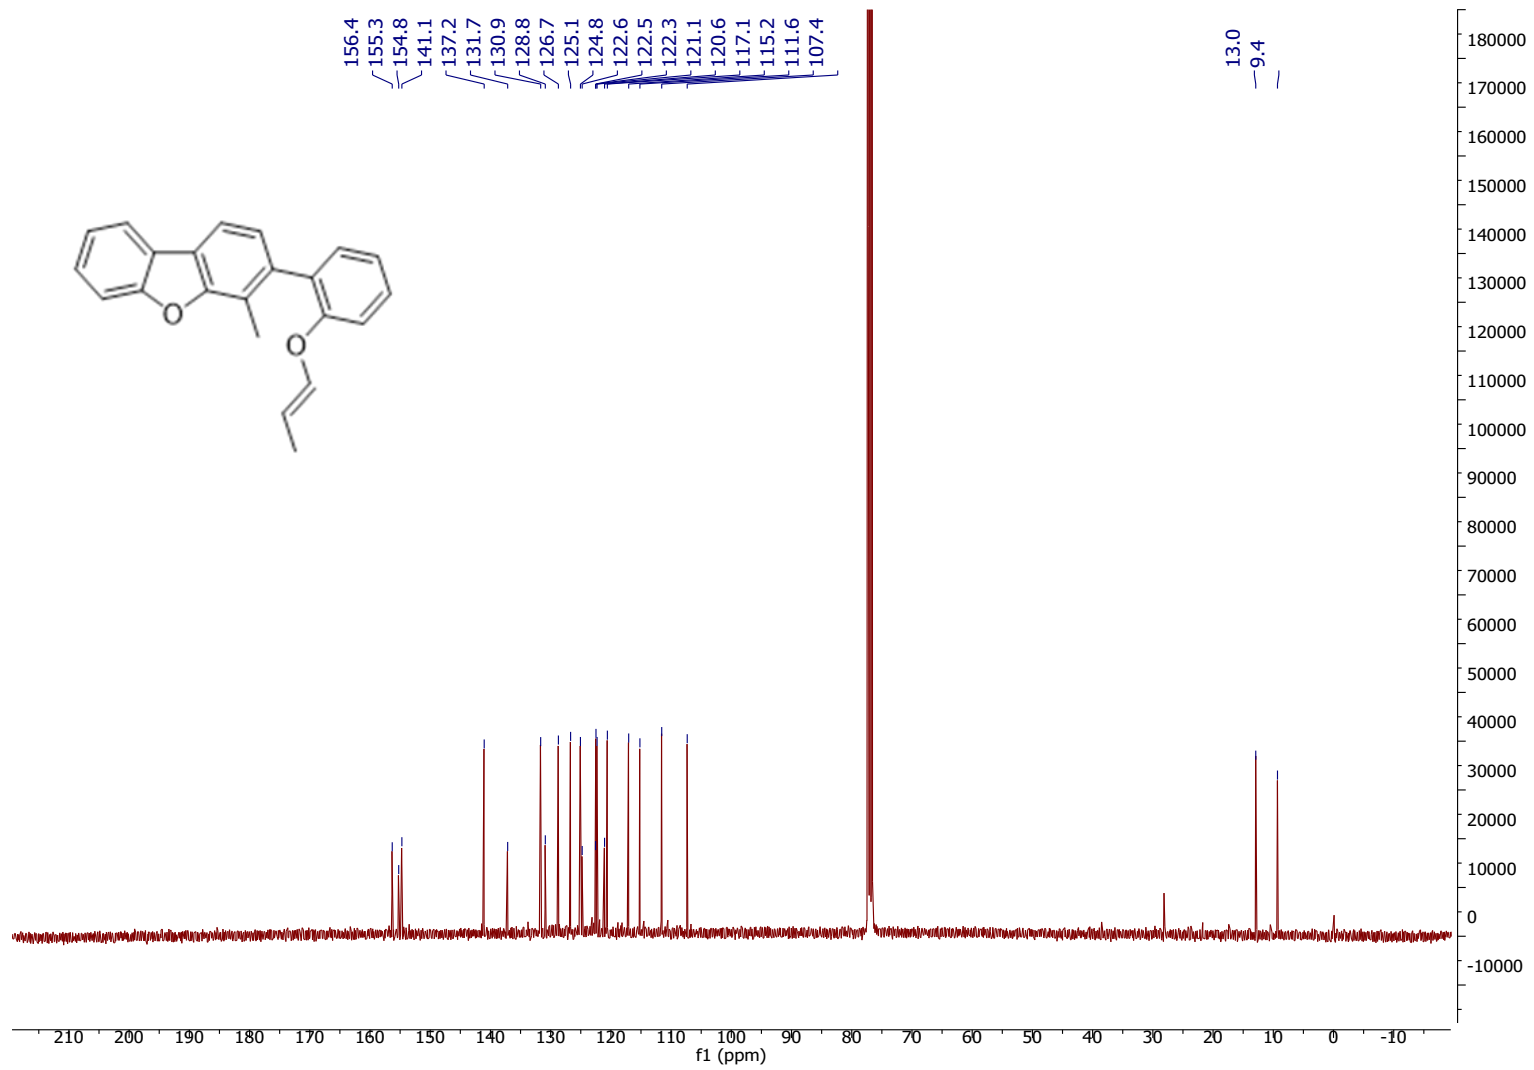

**4I: 2,2''-bis((2-methylprop-1-en-1-yl)oxy)-4'-(2-((2-methylprop-1-en-1-yl)oxy)phenyl)-1,1':2',1''-terphenyl**

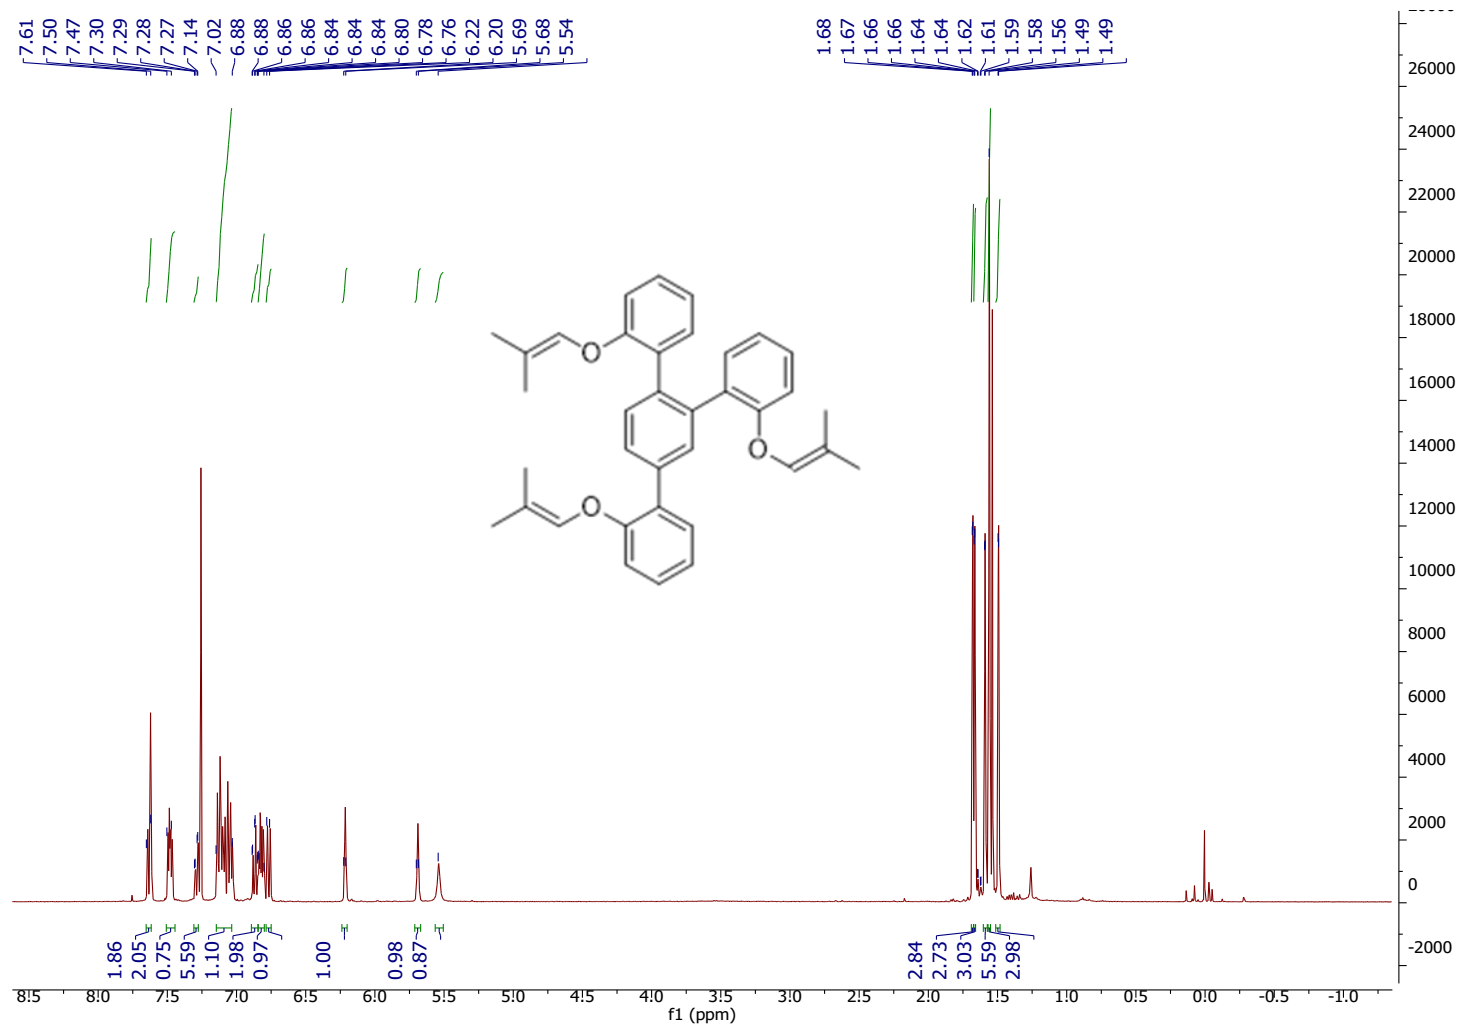

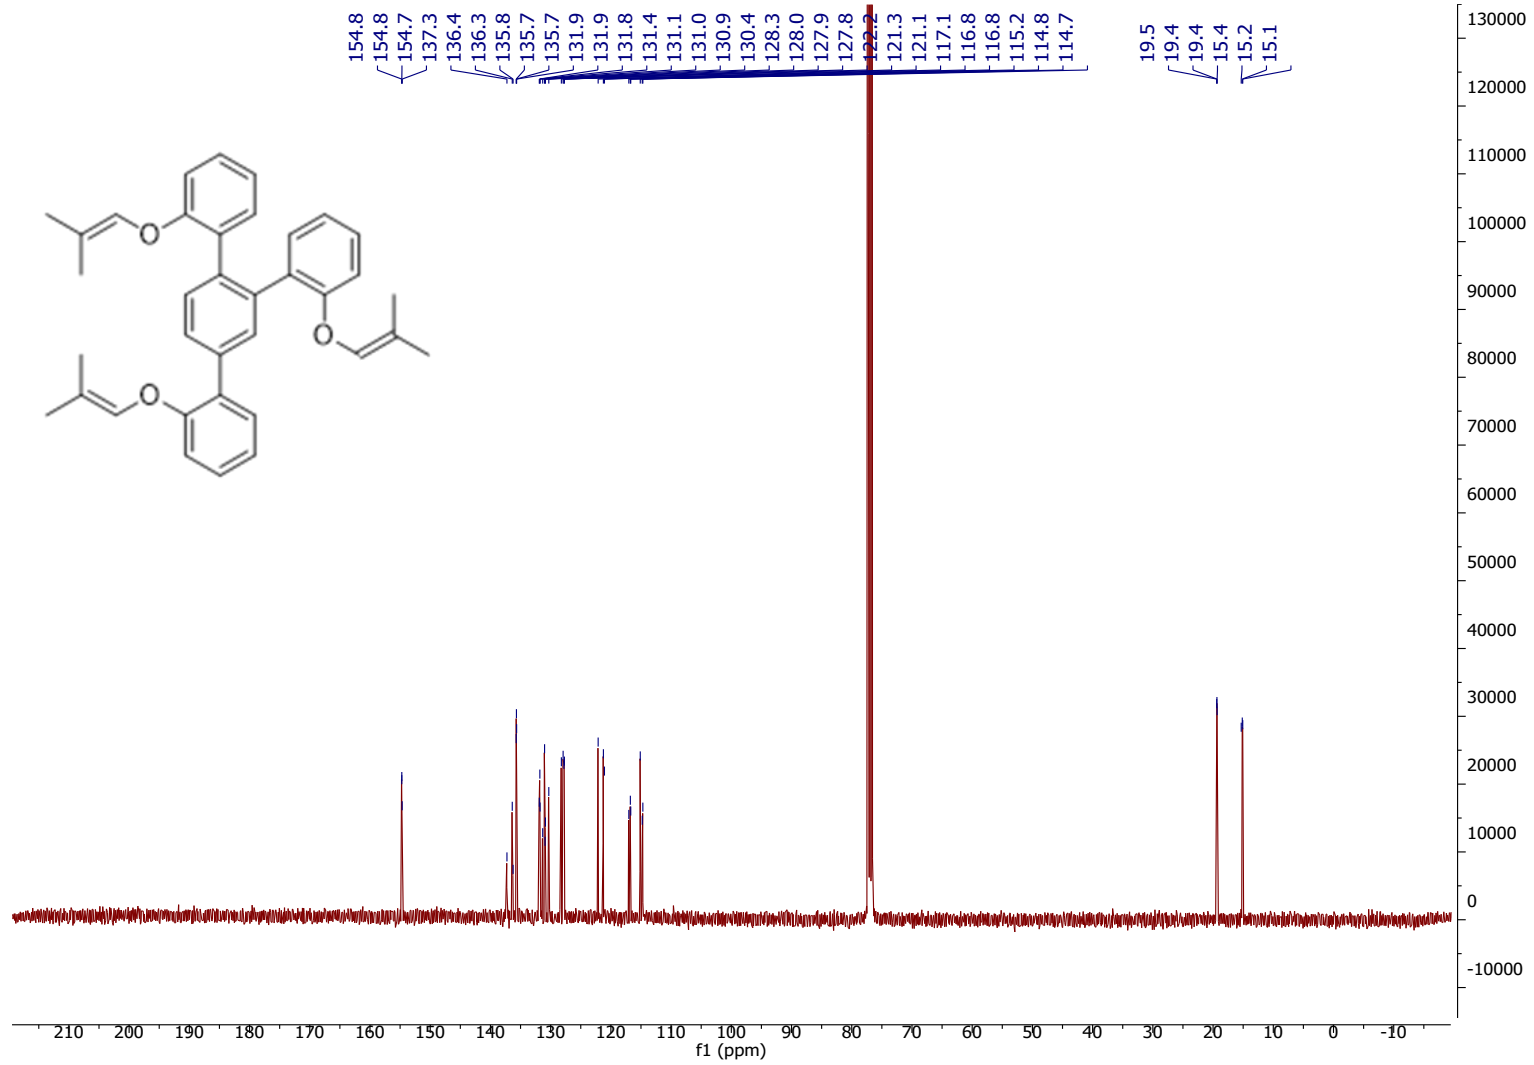

5: *tert*-butyldimethyl((3-(prop-1-en-2-yl)benzofuran-2-yl)methoxy)silane

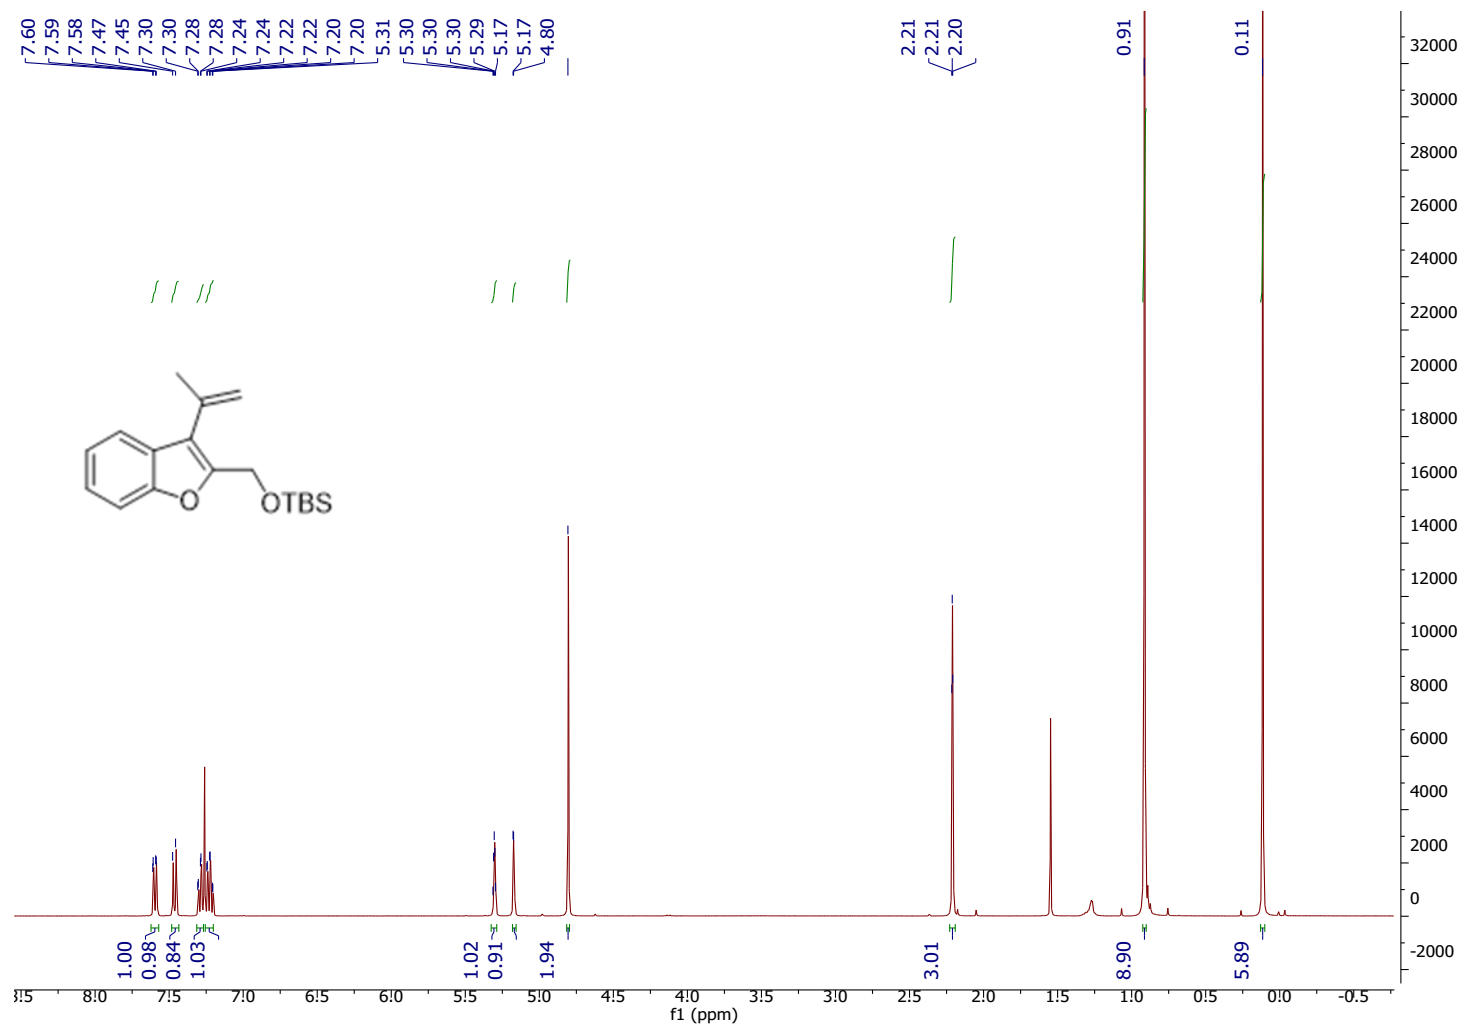

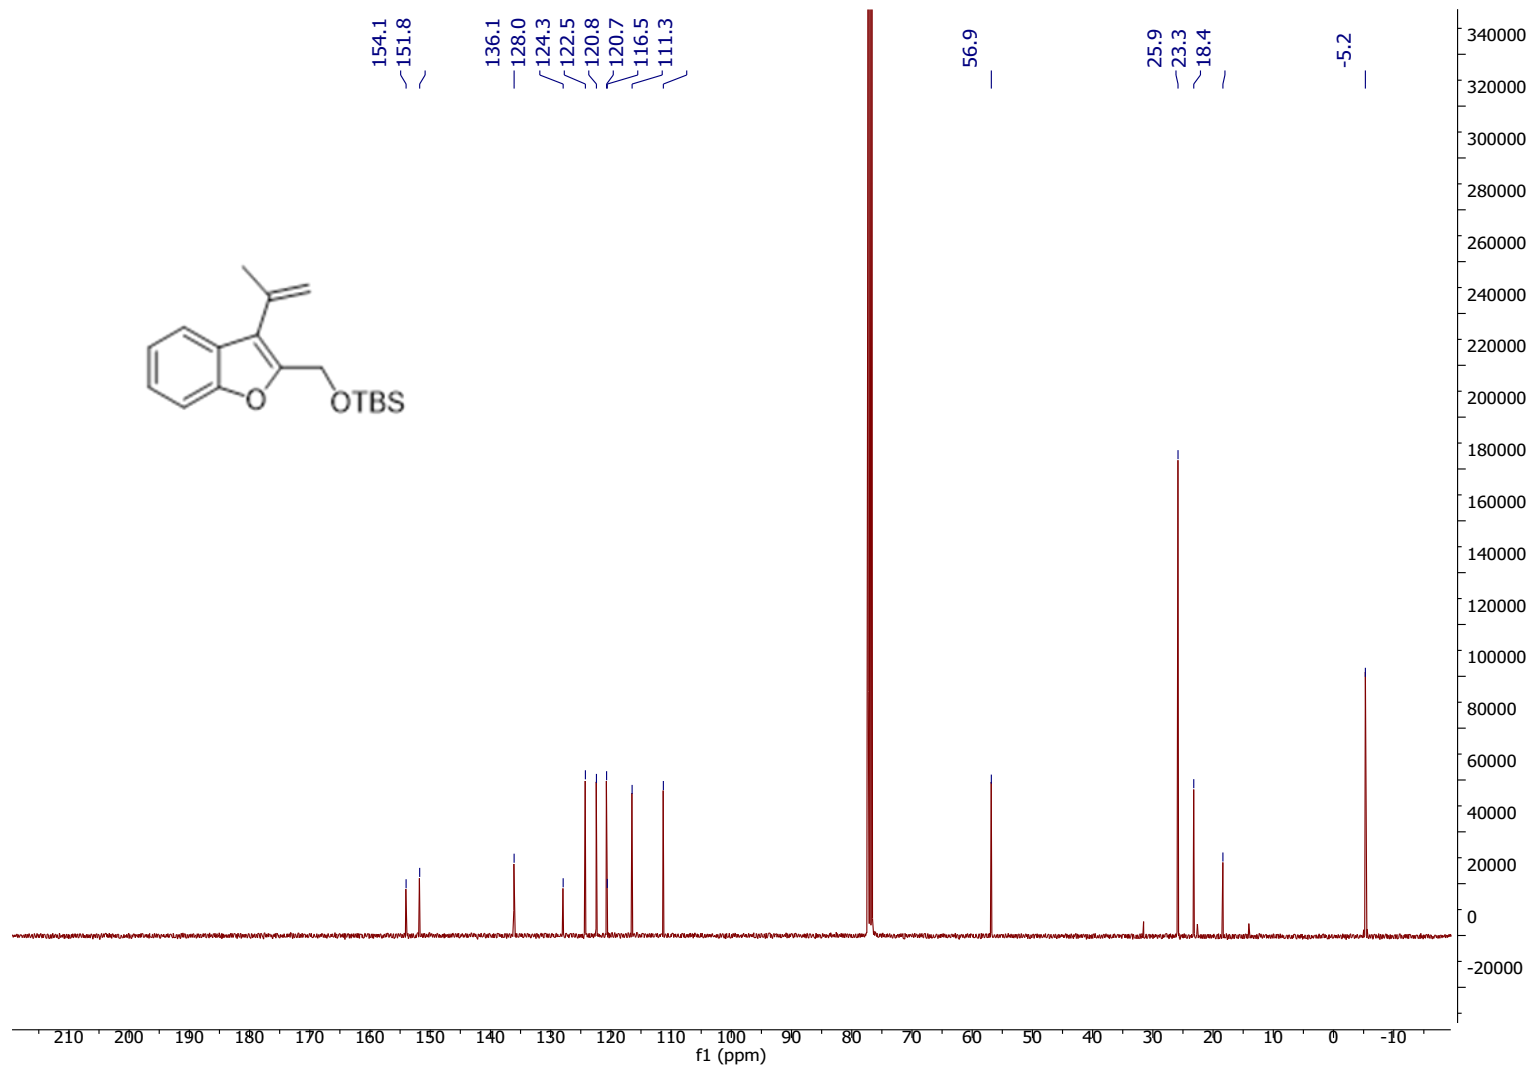

1a: 1-ethynyl-2-(vinylloxy)benzene

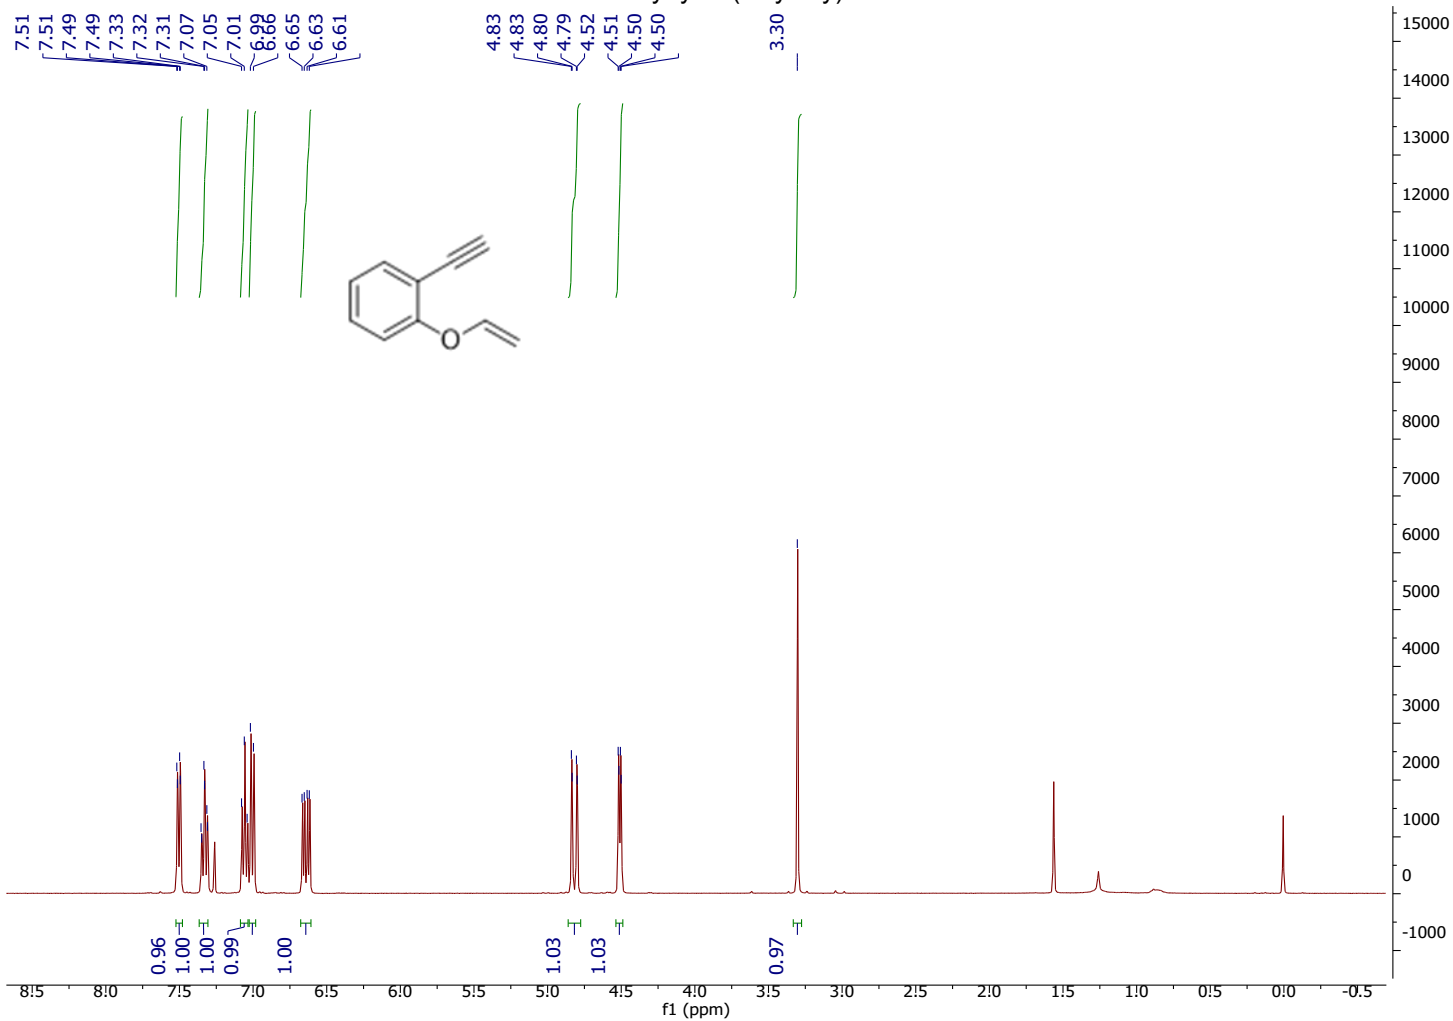



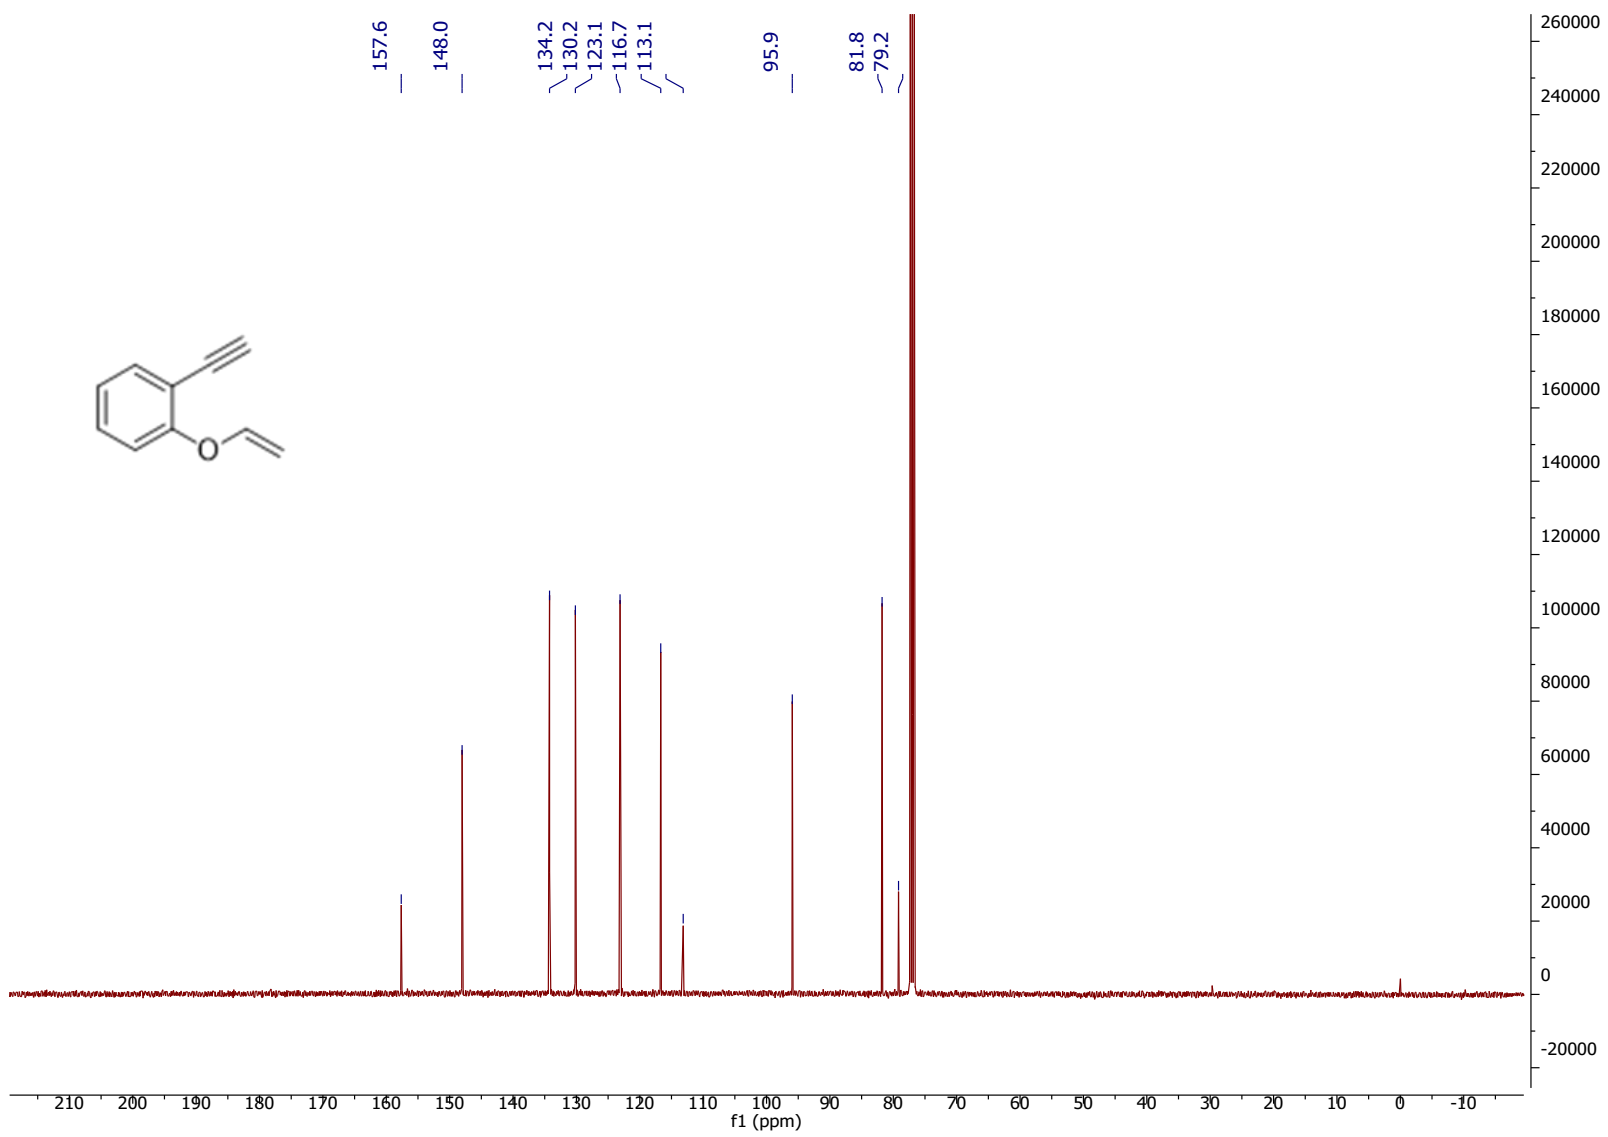

**1b: 2-ethynyl-4-fluoro-1-(vinylloxy)benzene**

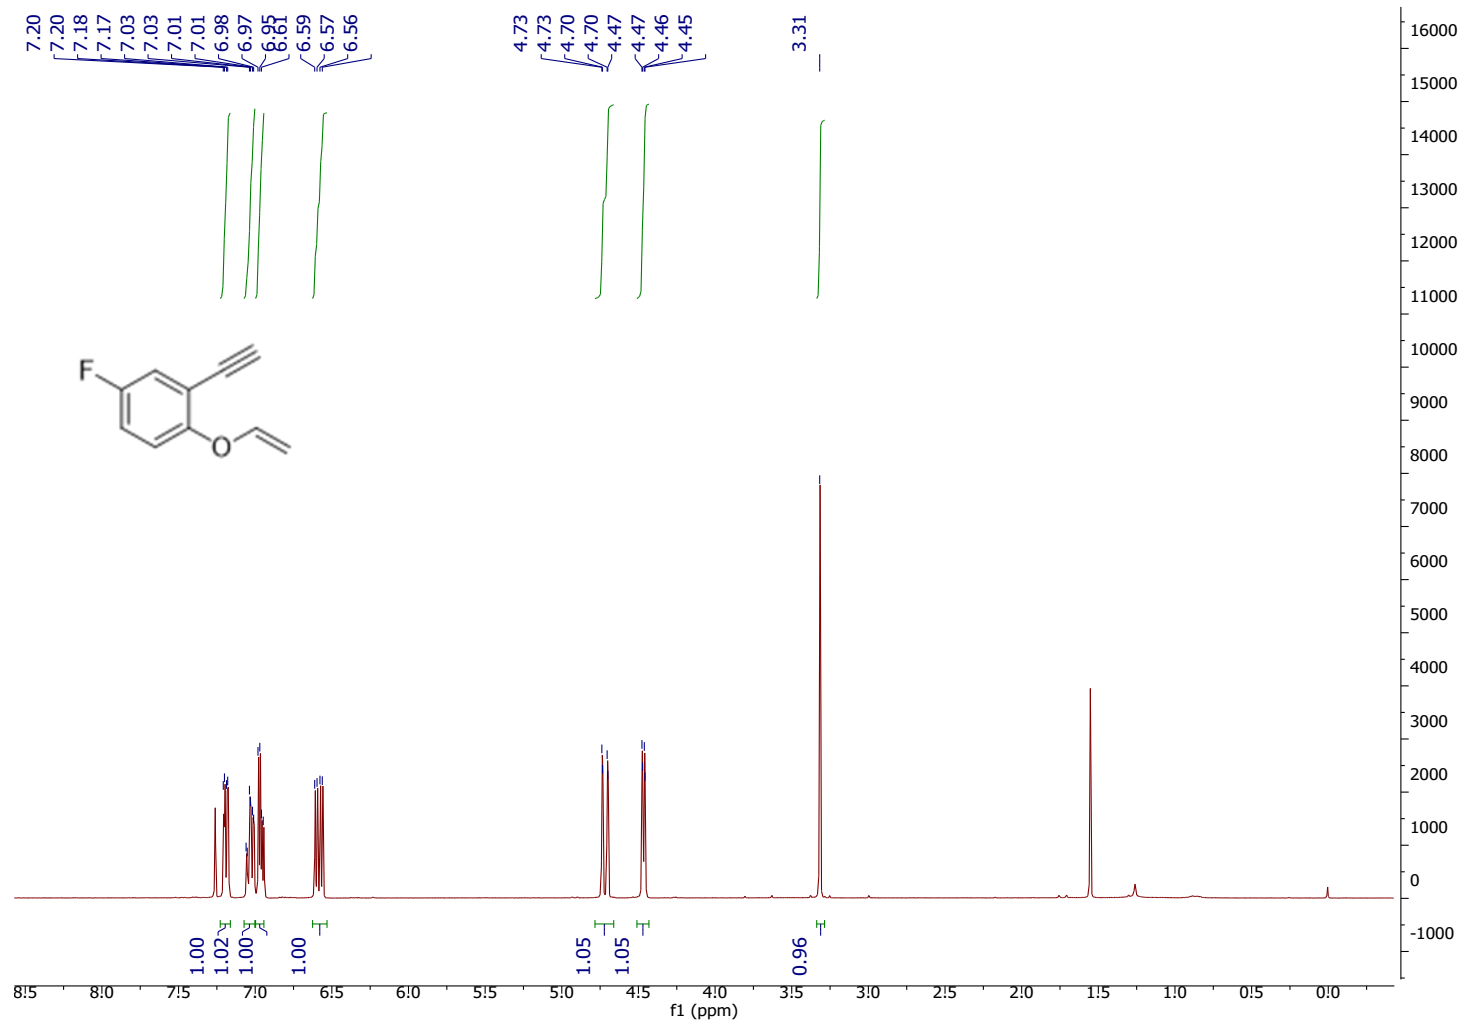

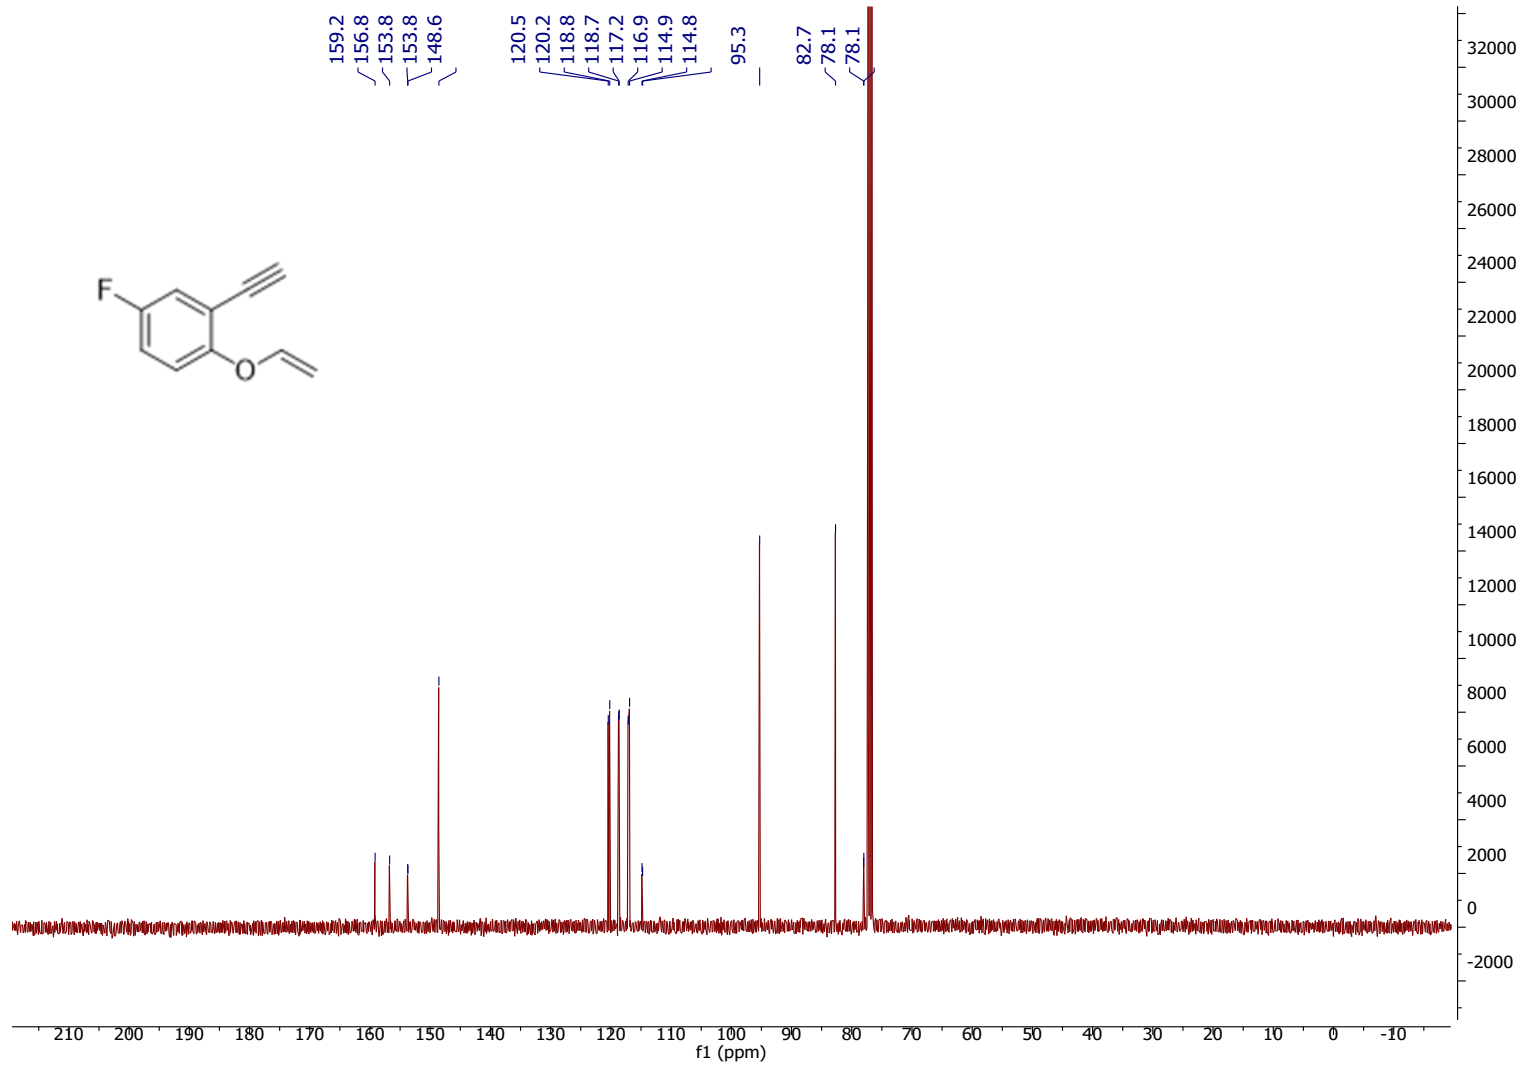

**1c: (tert-butyl)-2-ethynyl-1-(vinyloxy)benzene**

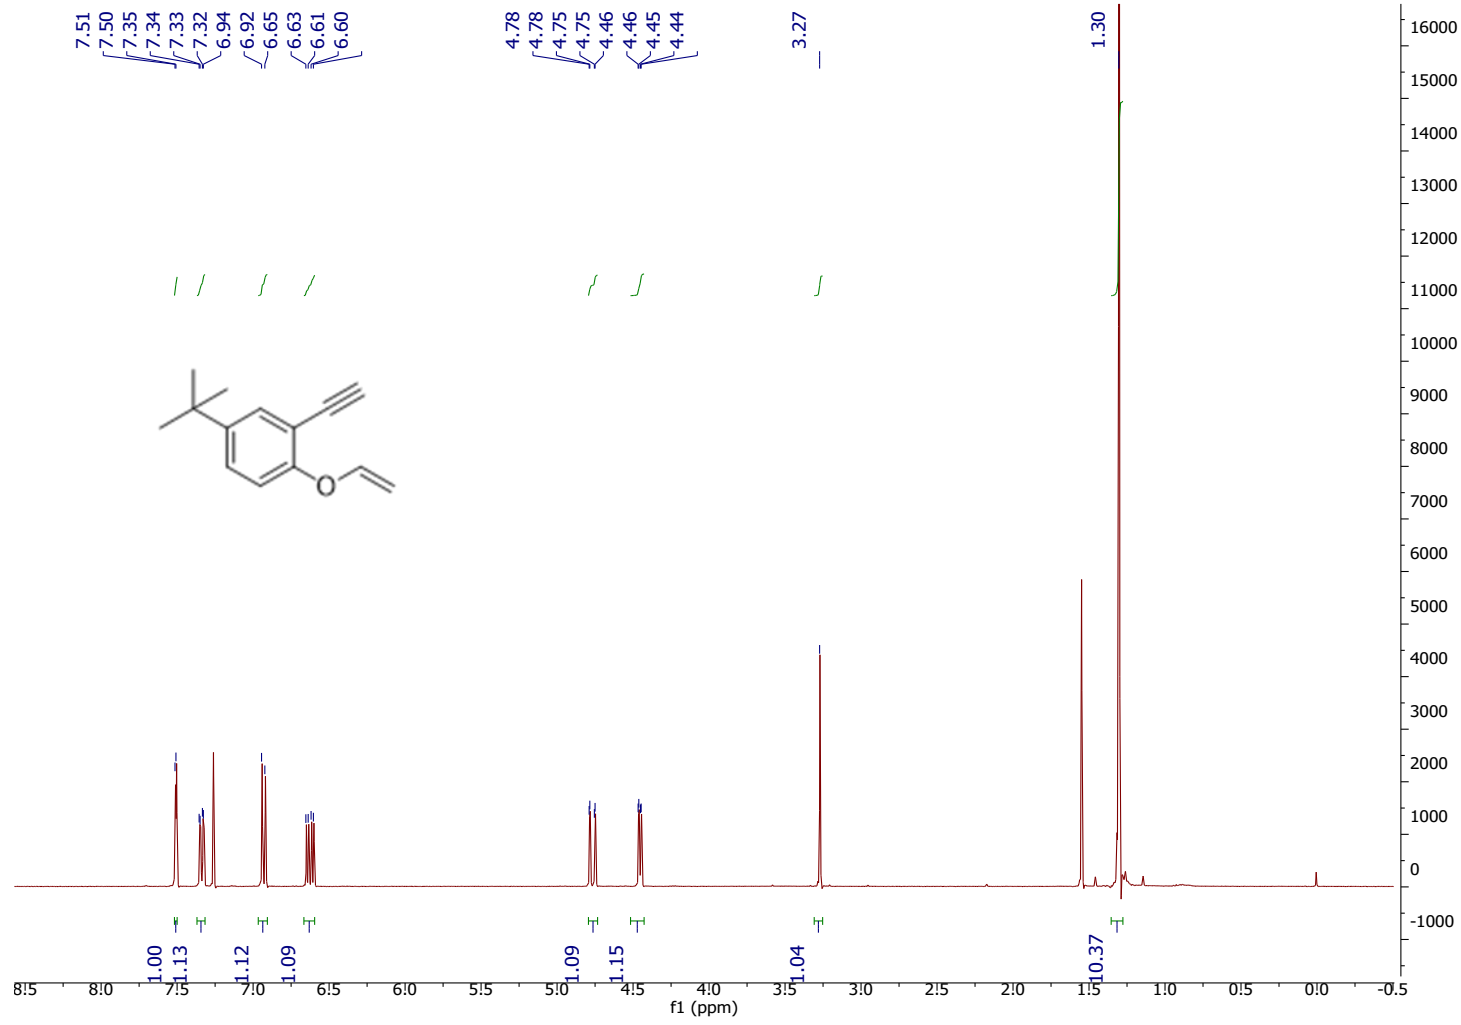

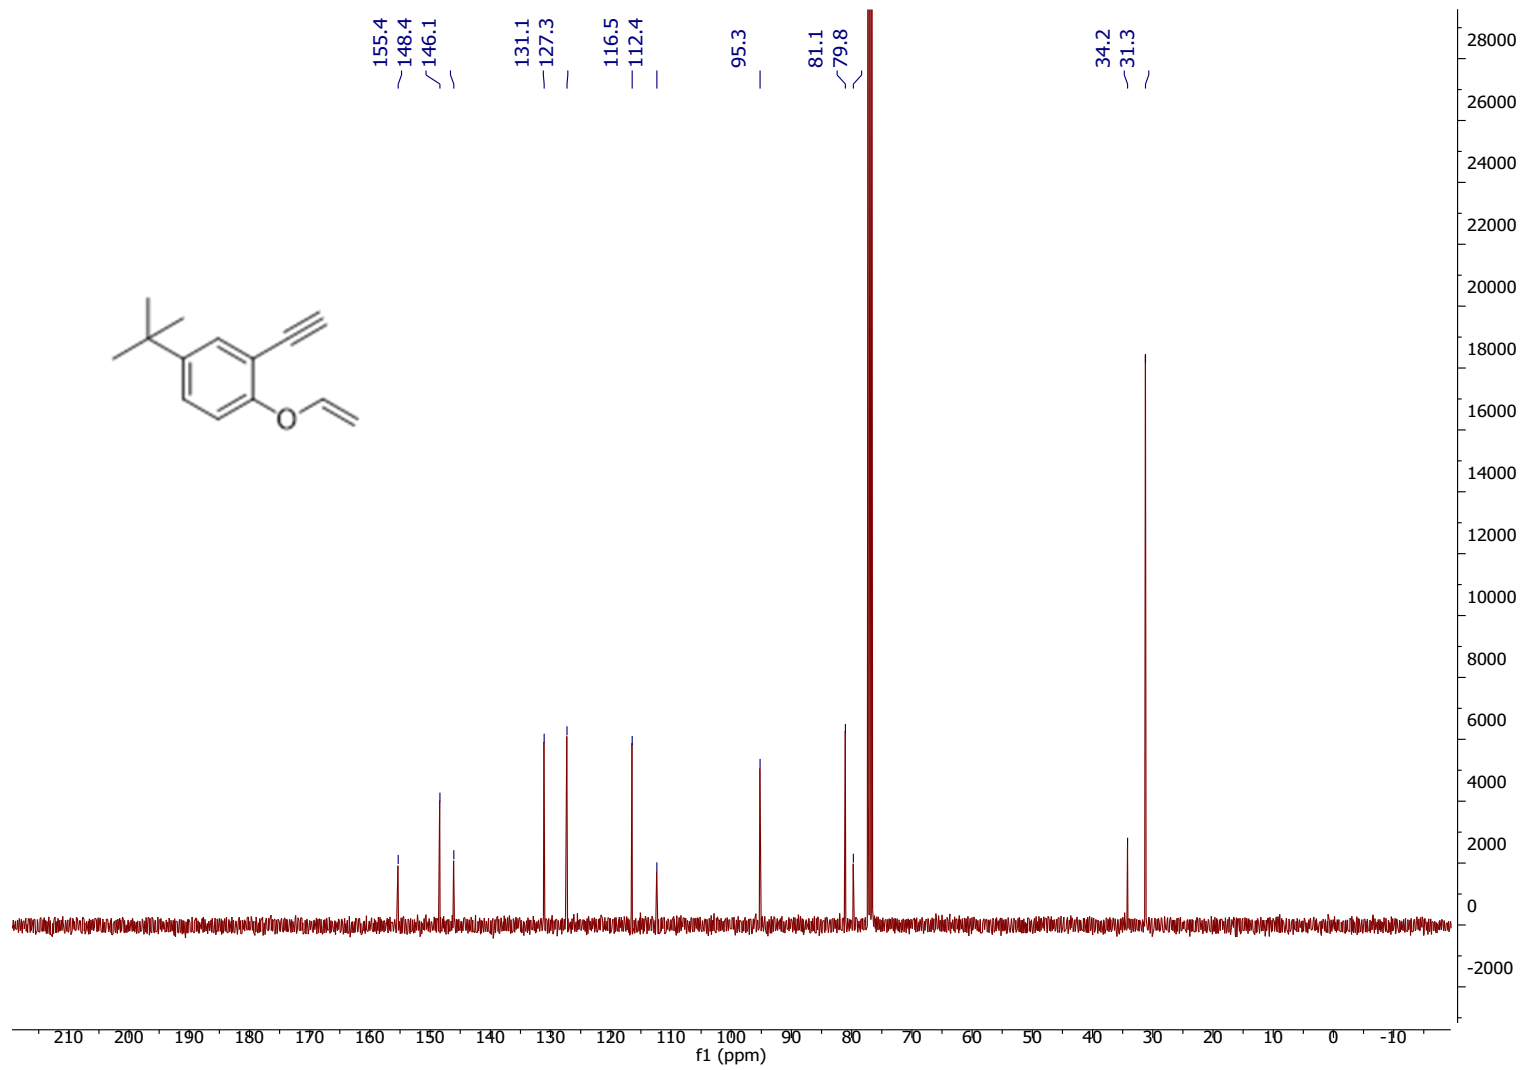

1d: 2-ethynyl-4-methoxy-1-(vinylloxy)benzene

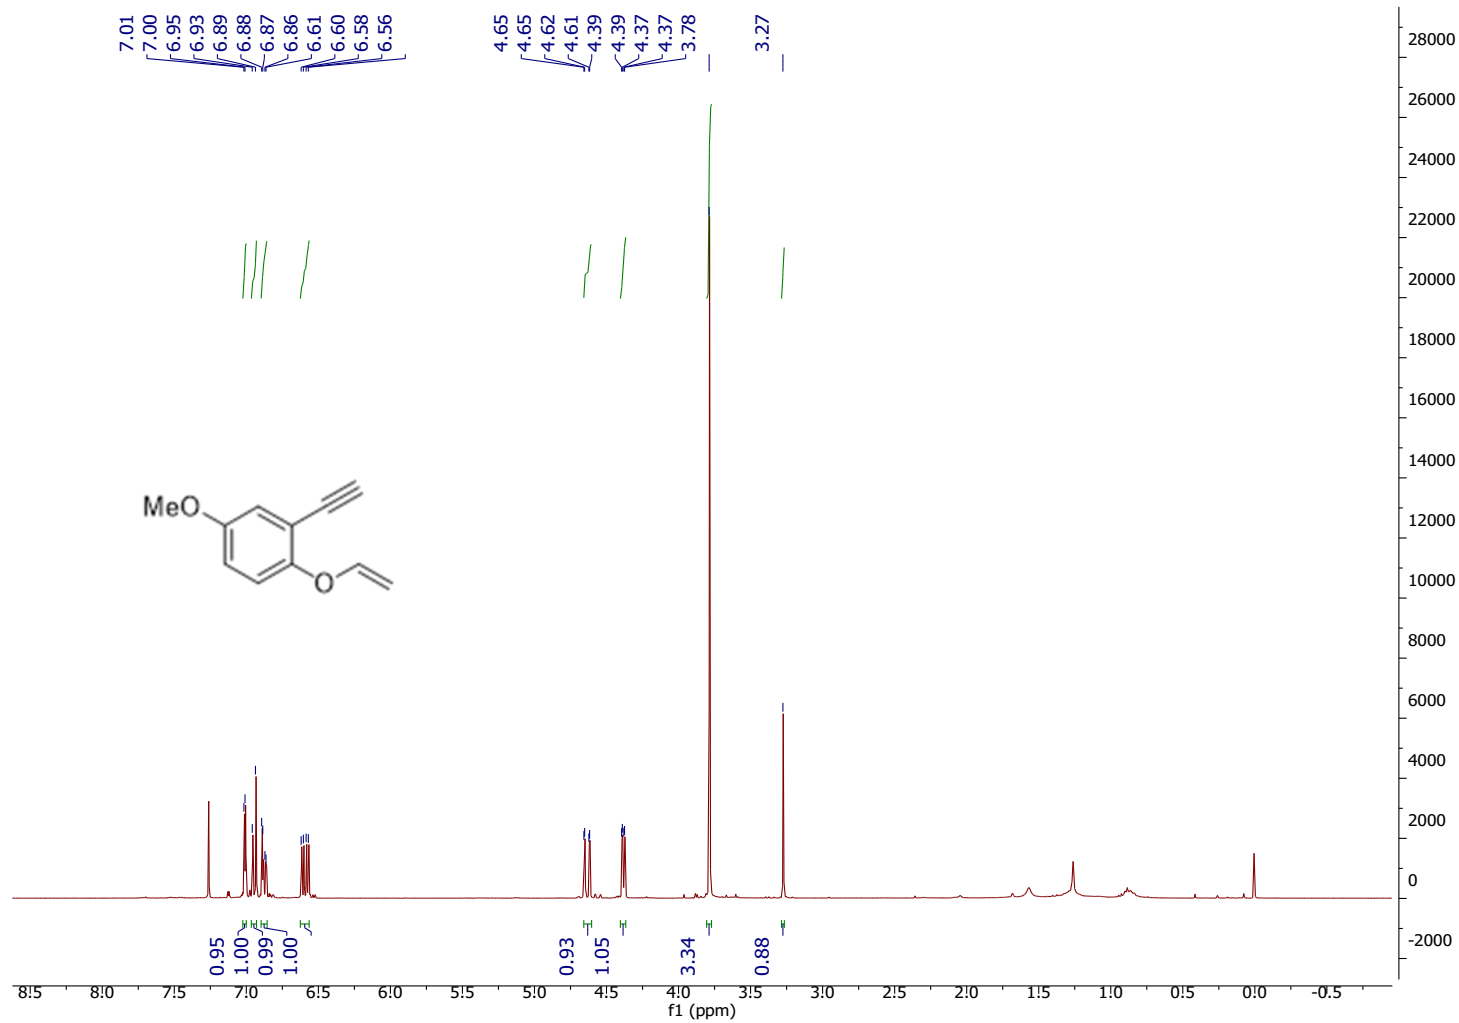

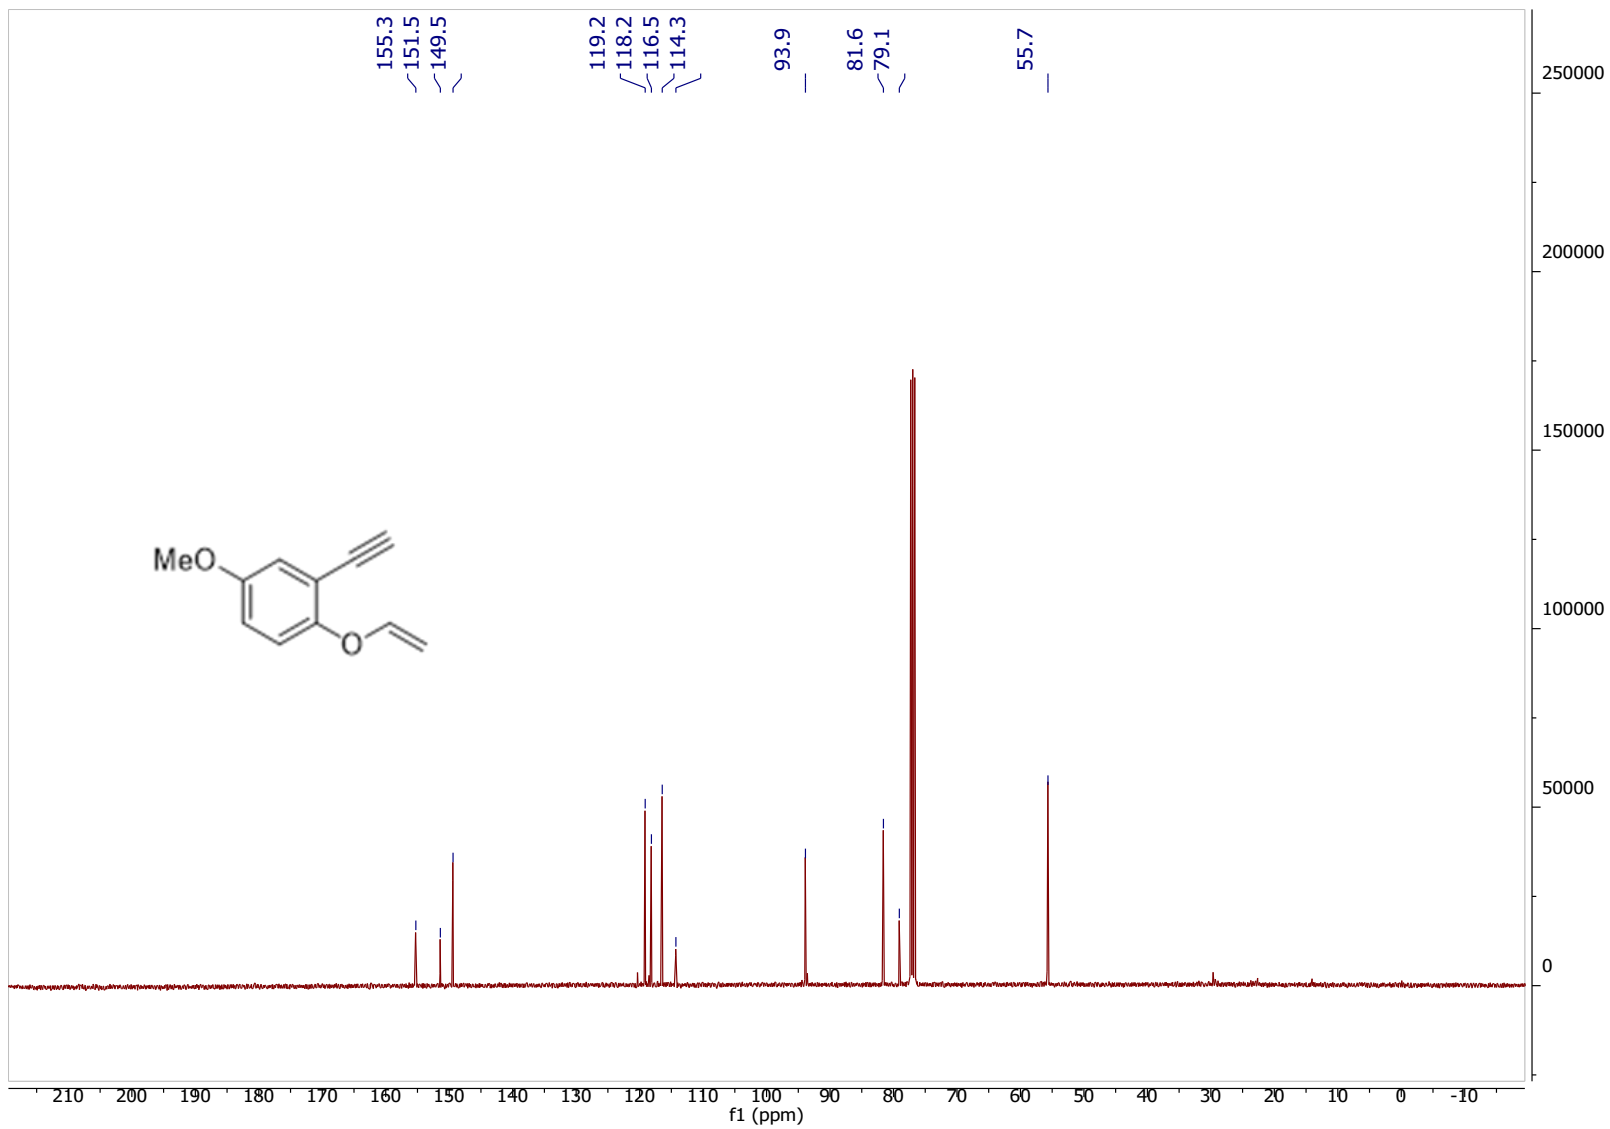

1e: 1-ethynyl-2-(vinyloxy)naphthalene

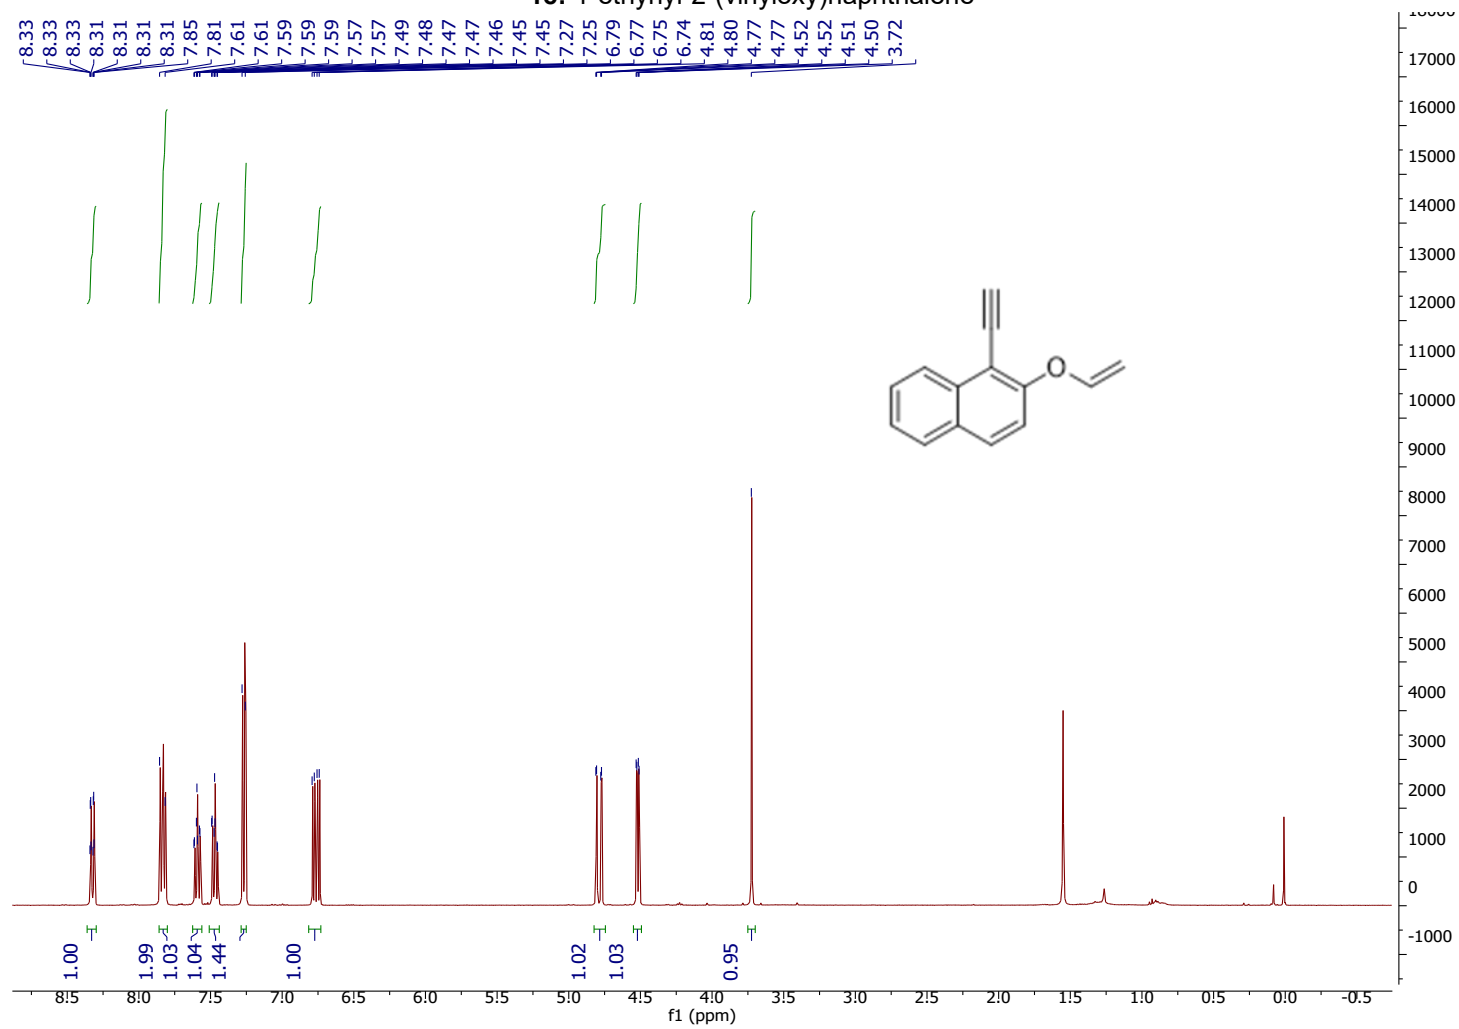



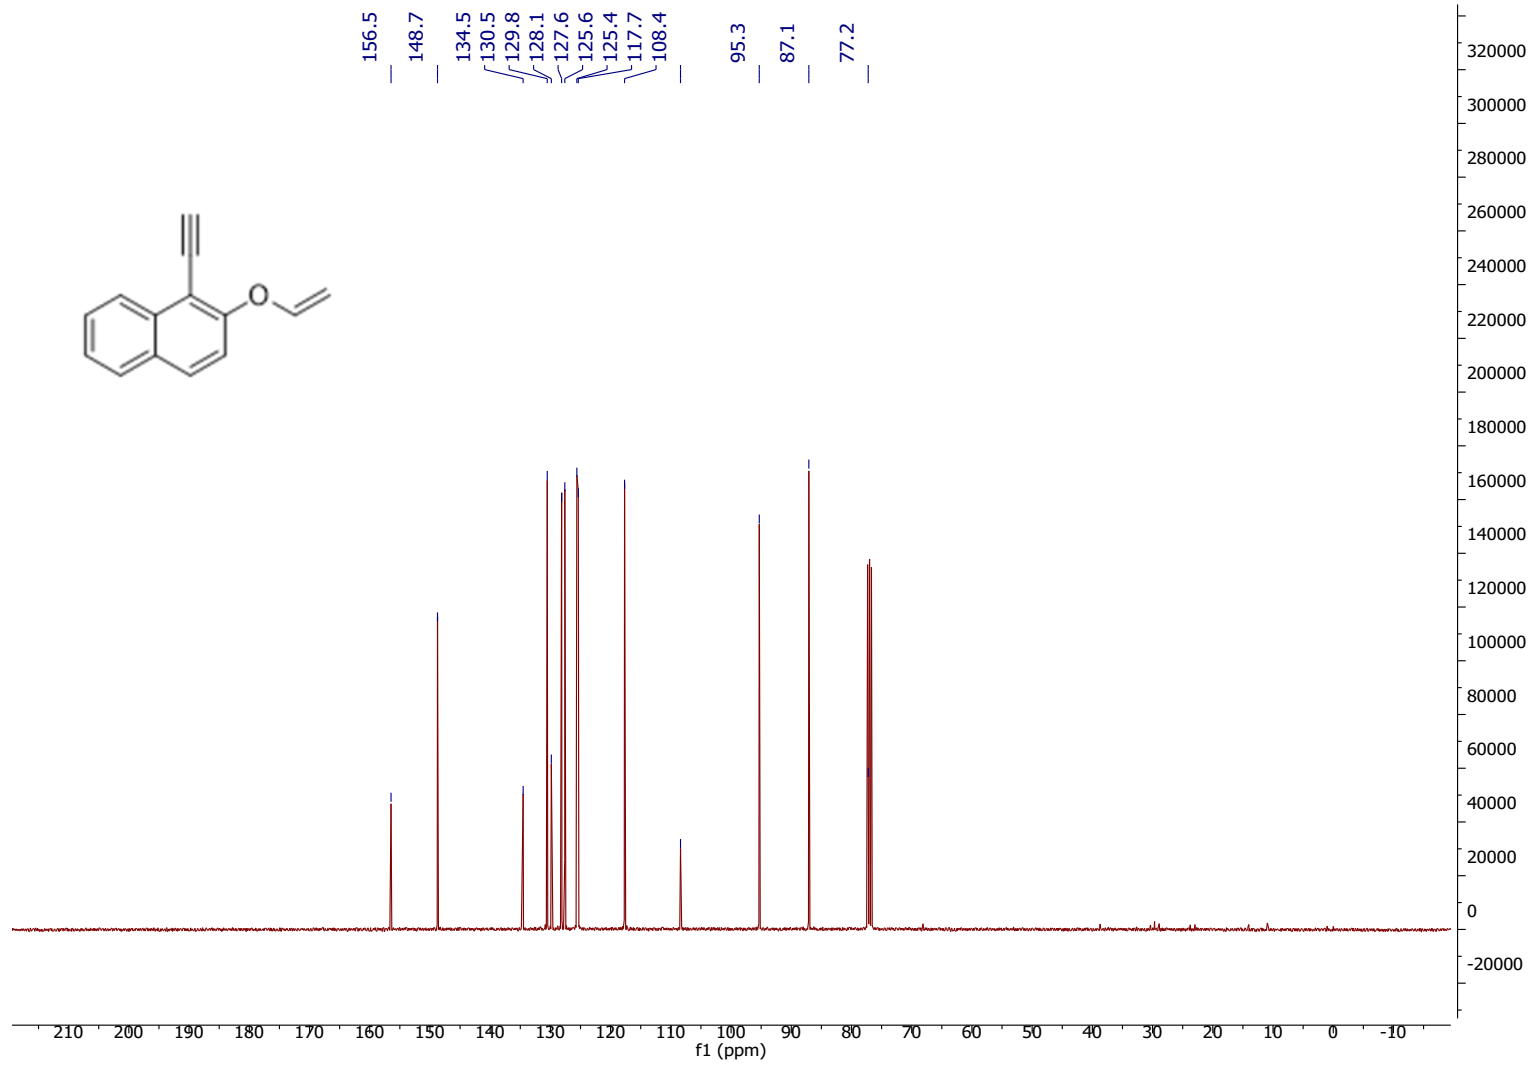

1f: (2-ethynylphenyl)(vinyl)sulfane

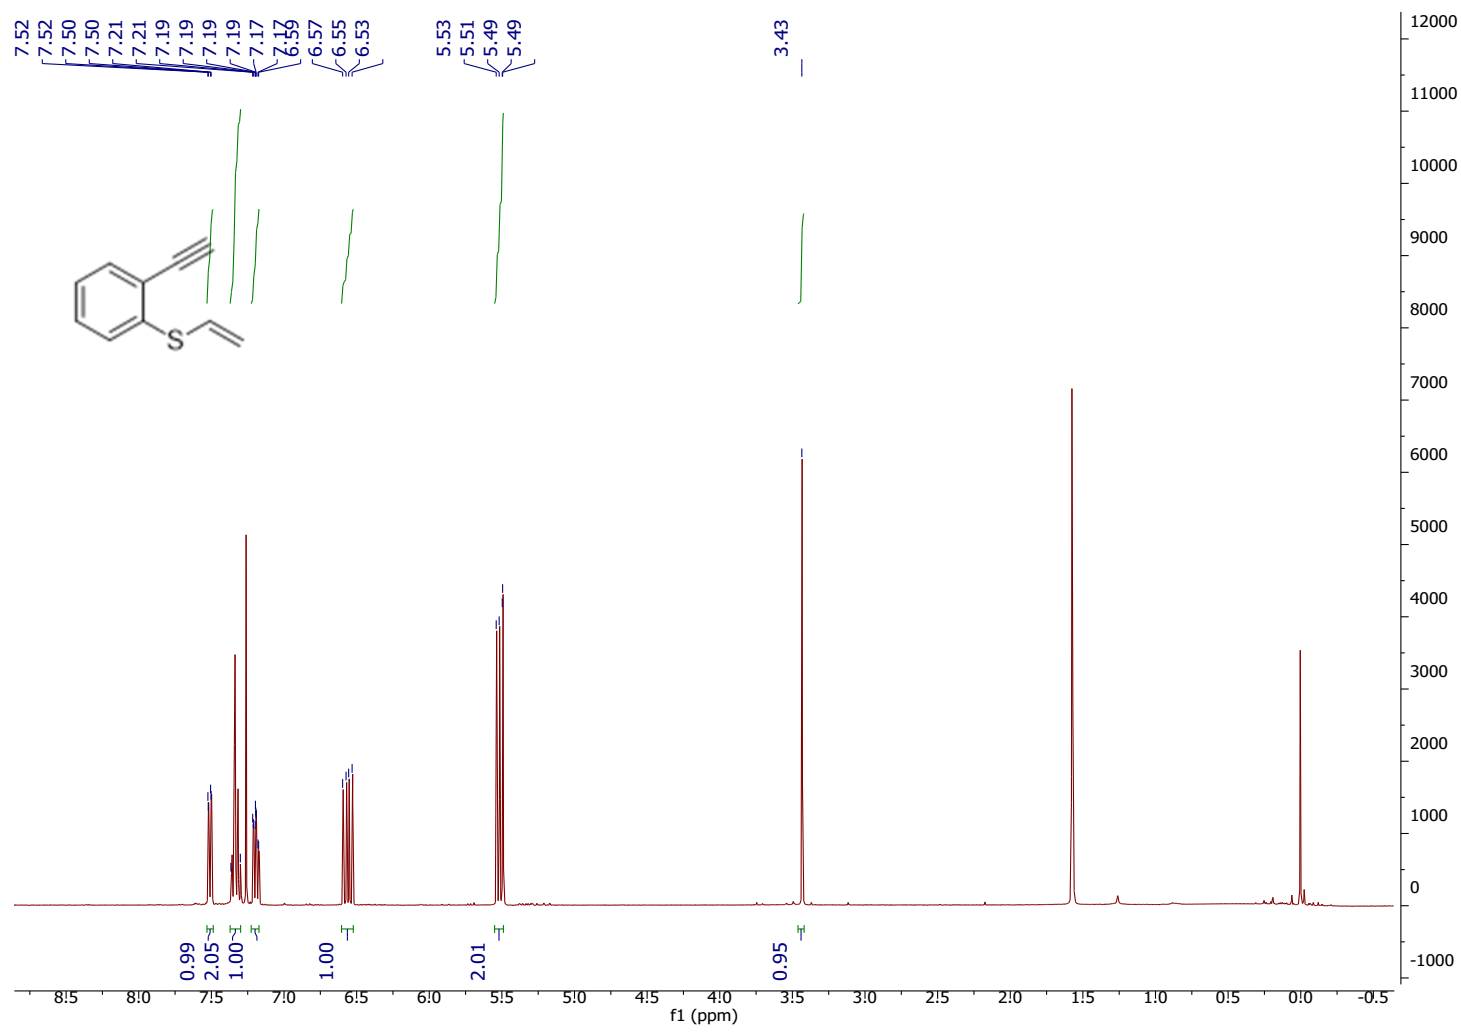

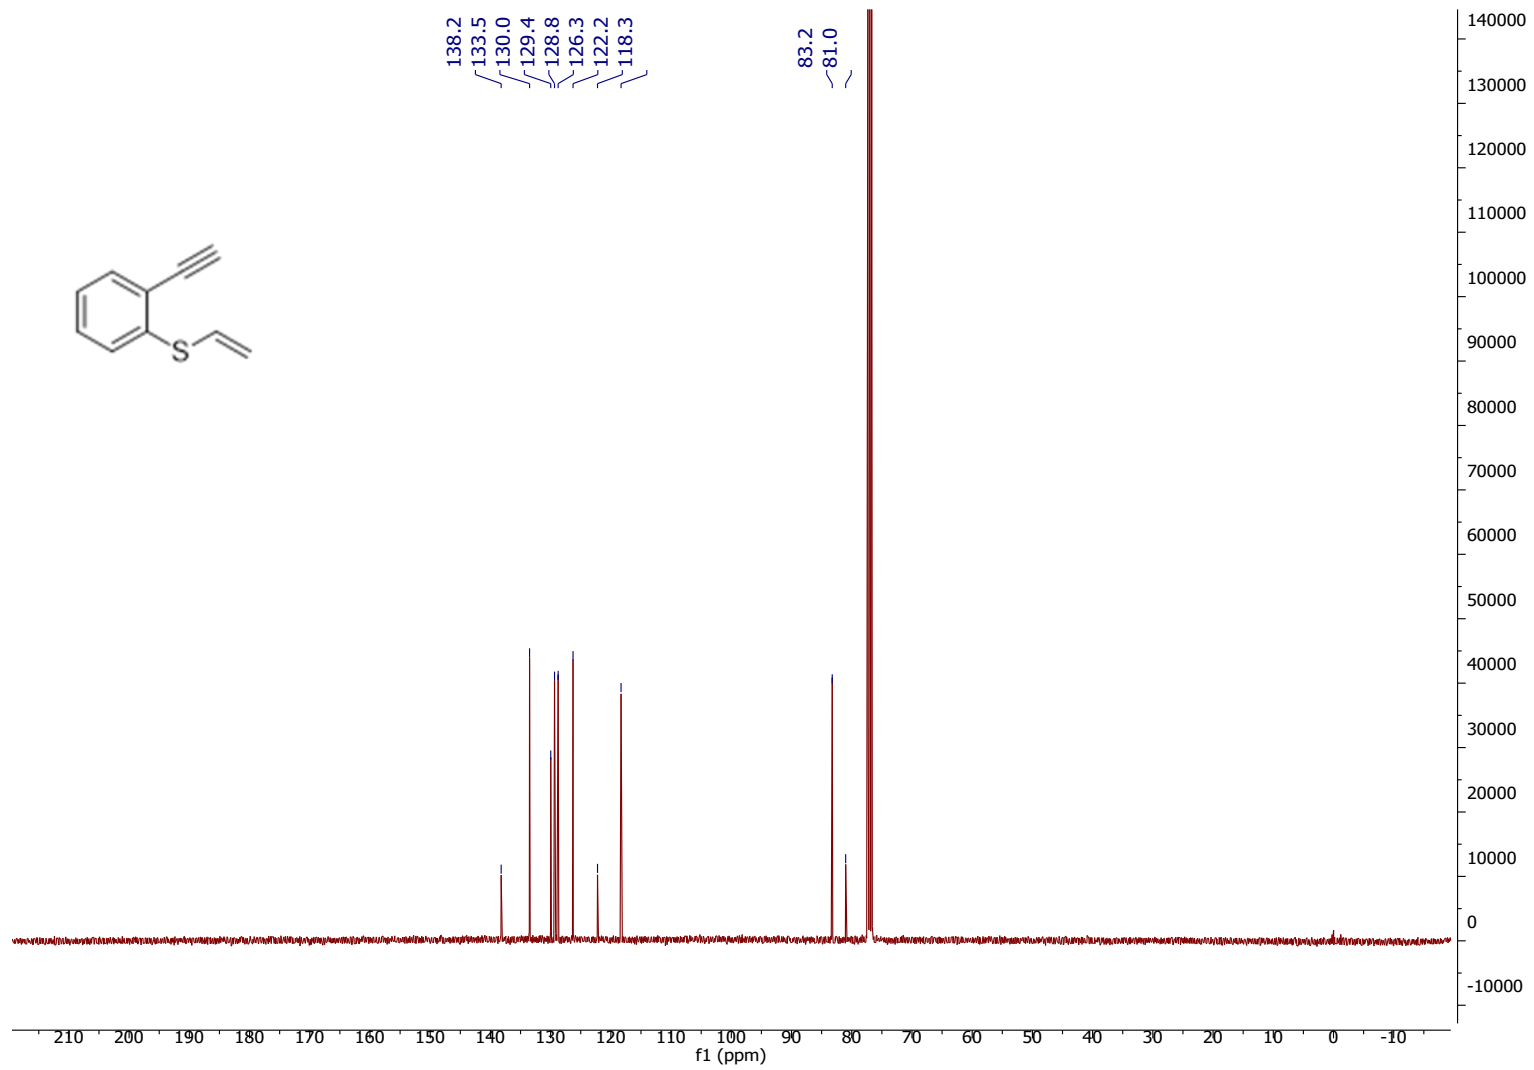

**1g: 1-(phenylethynyl)-2-(vinylloxy)benzene**

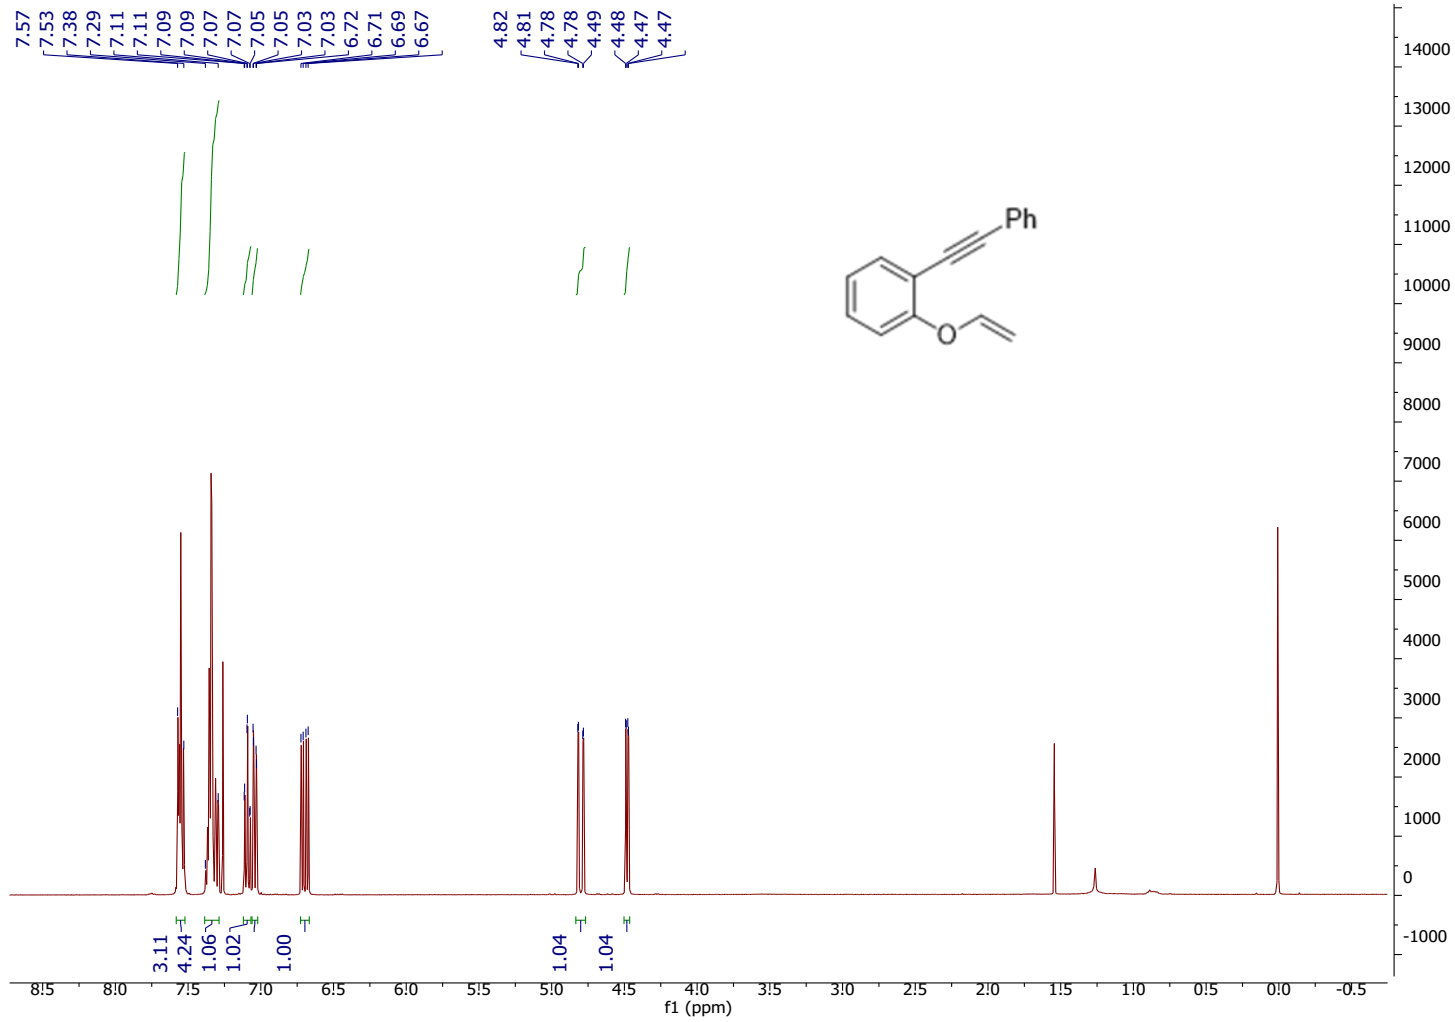

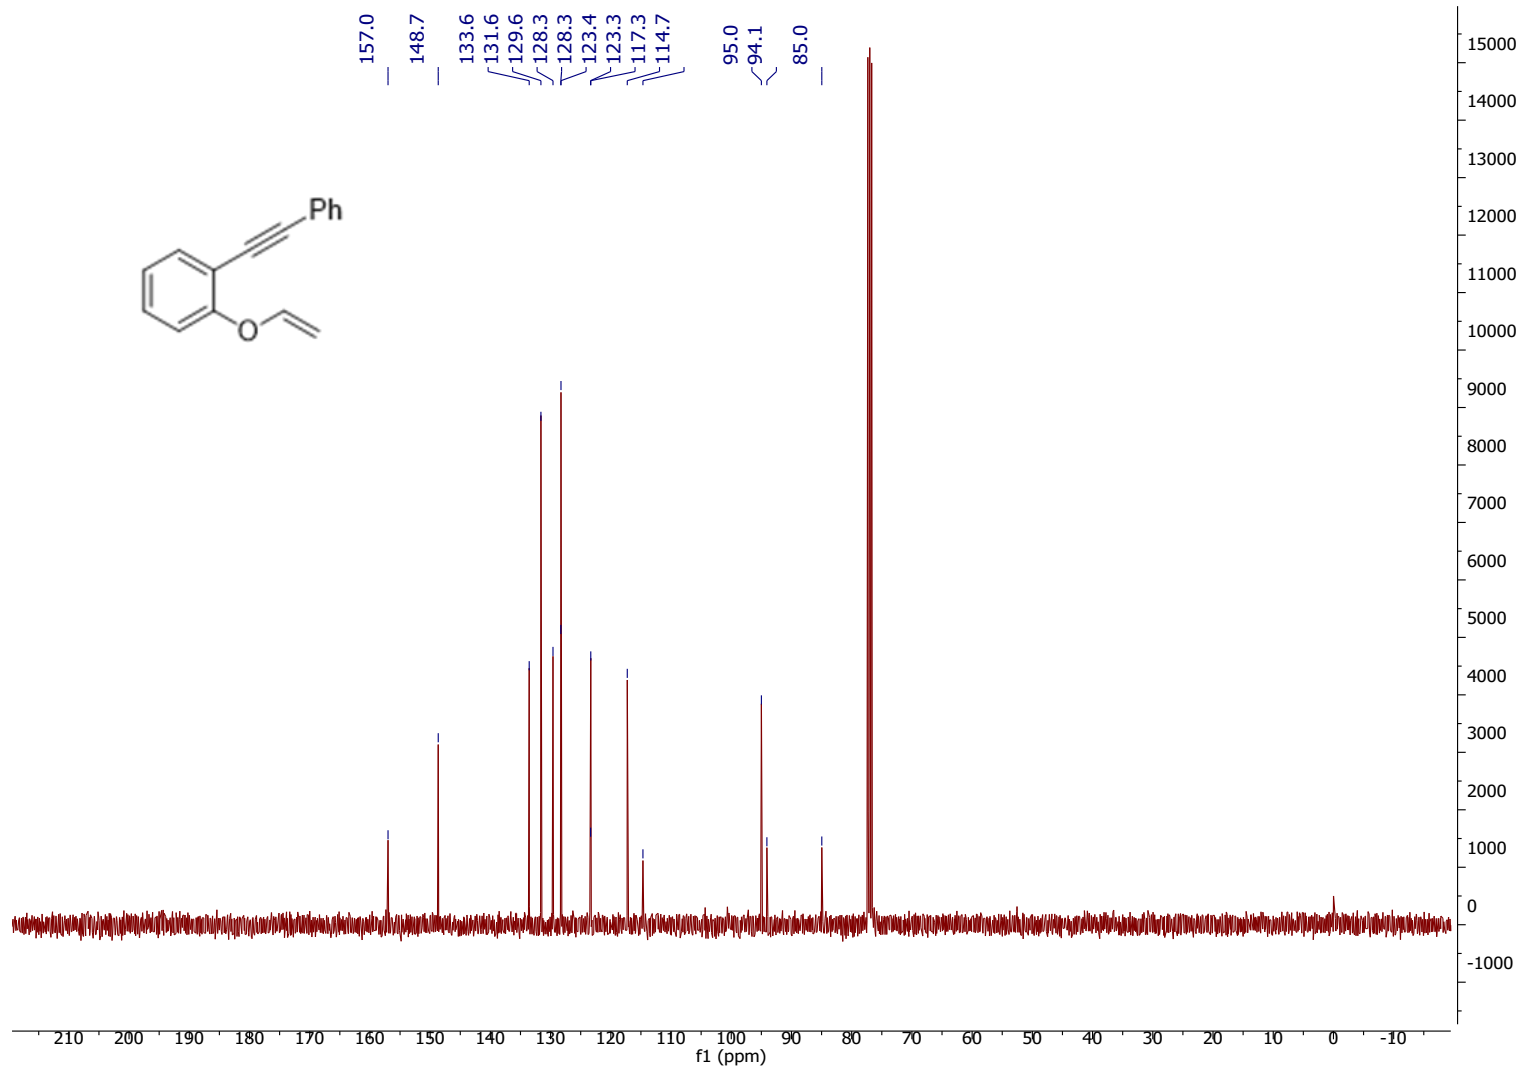

**1h:** trimethyl((2-(vinylloxy)phenyl)ethynyl)silane

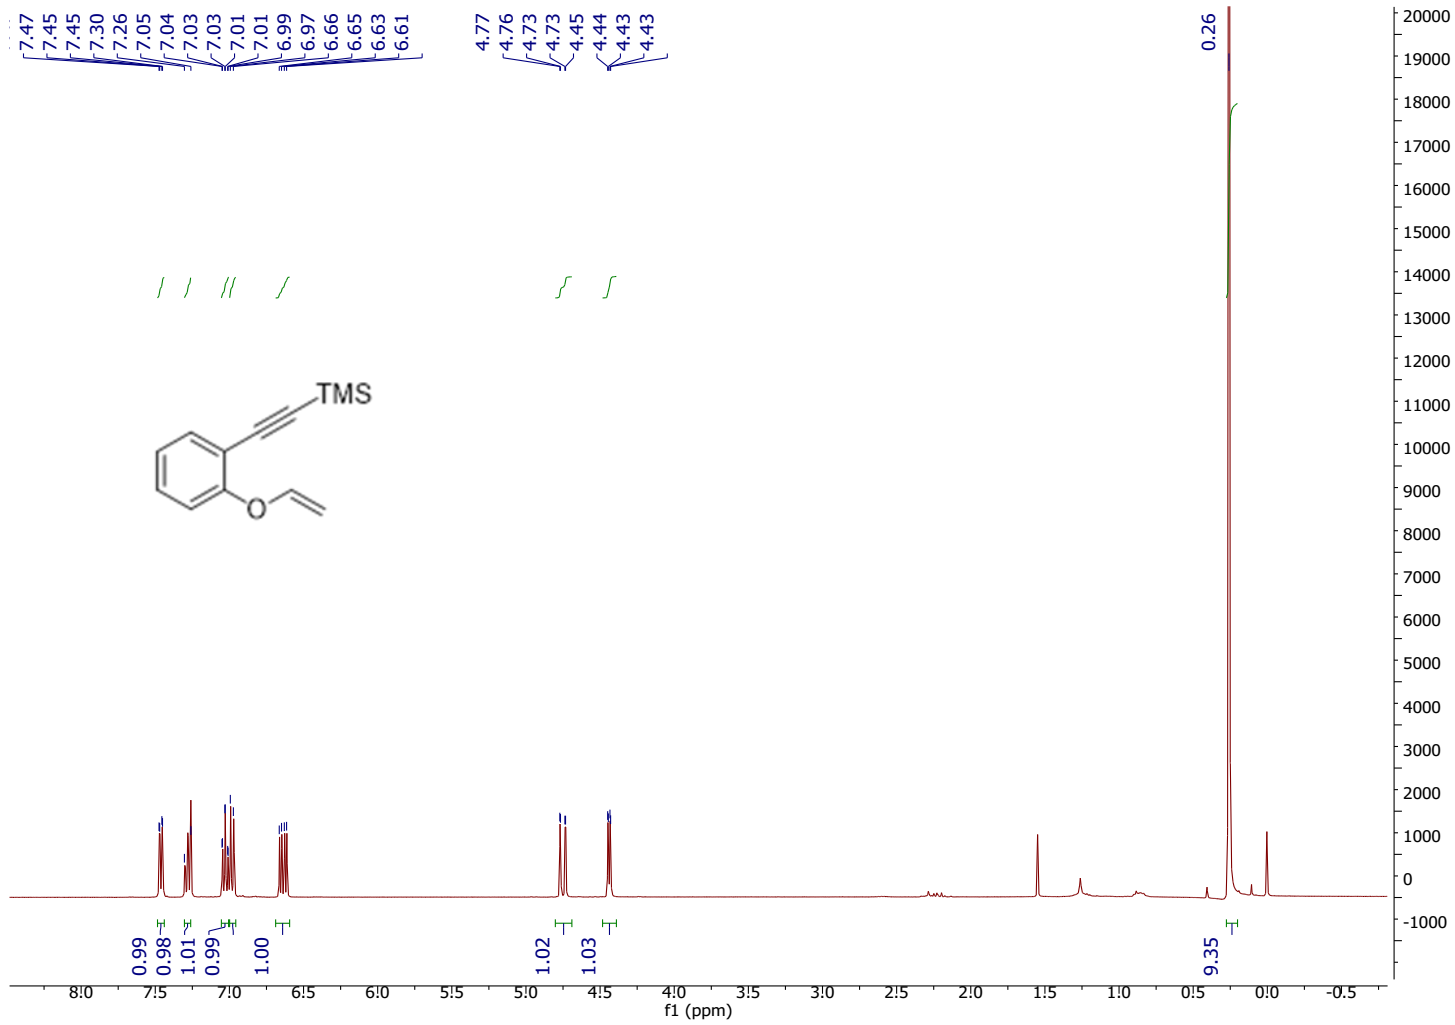

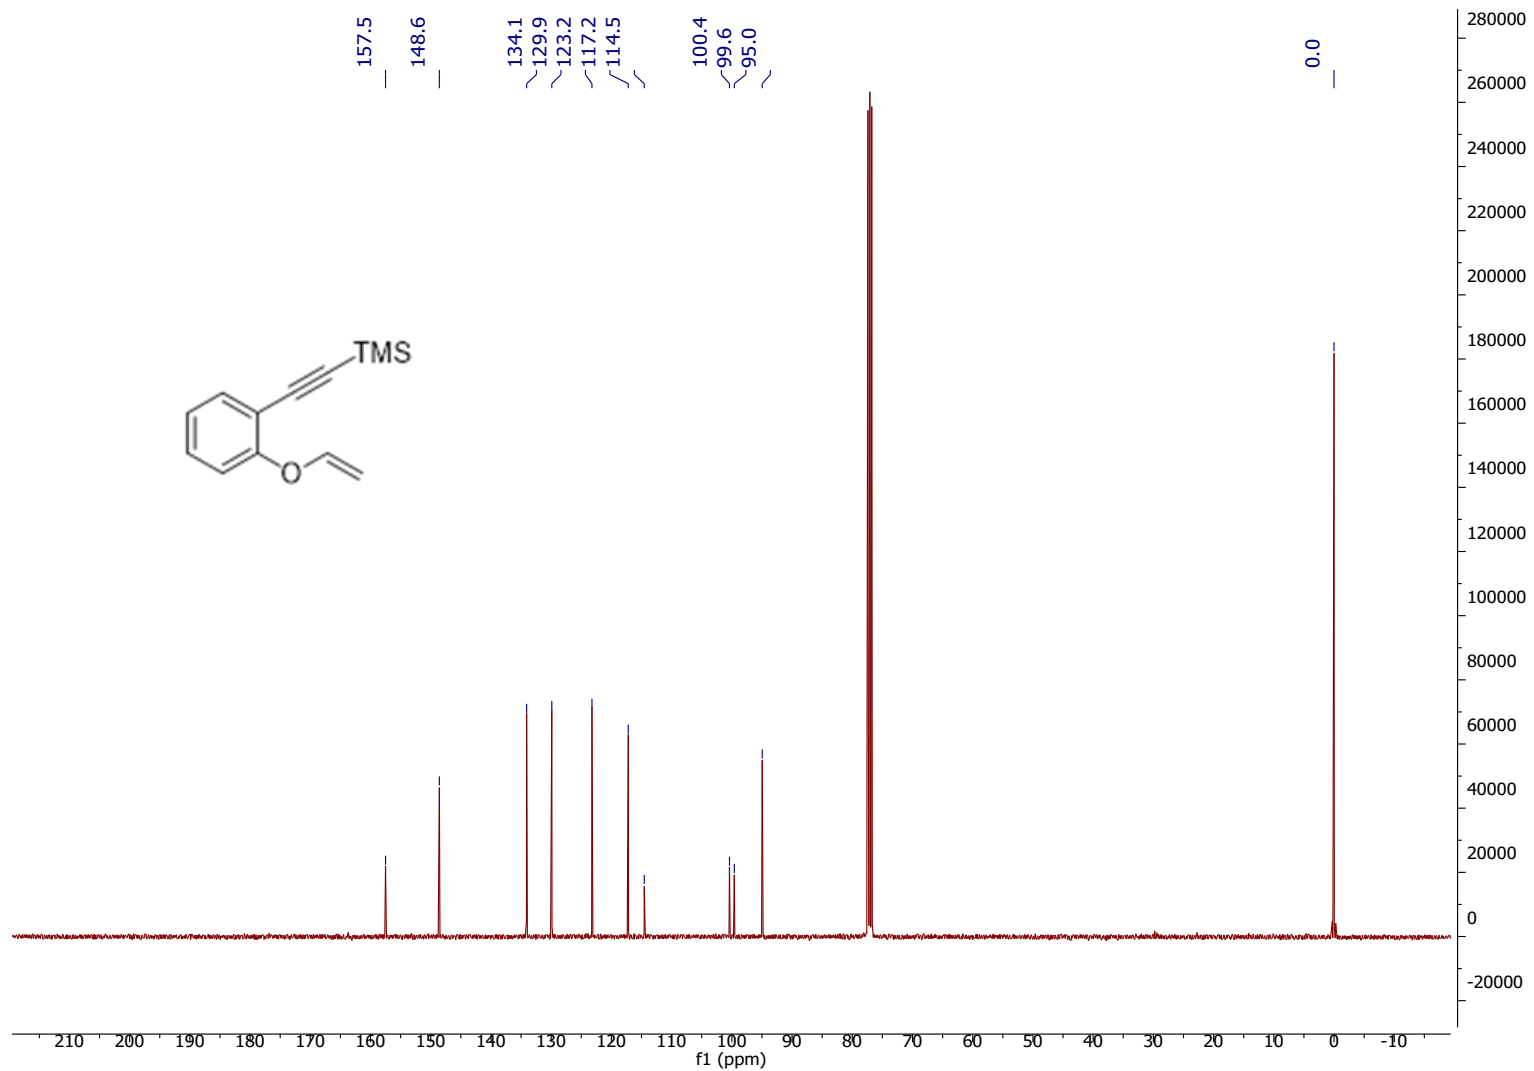

1i: (E)-1-ethynyl-2-(prop-1-en-1-yloxy)benzene

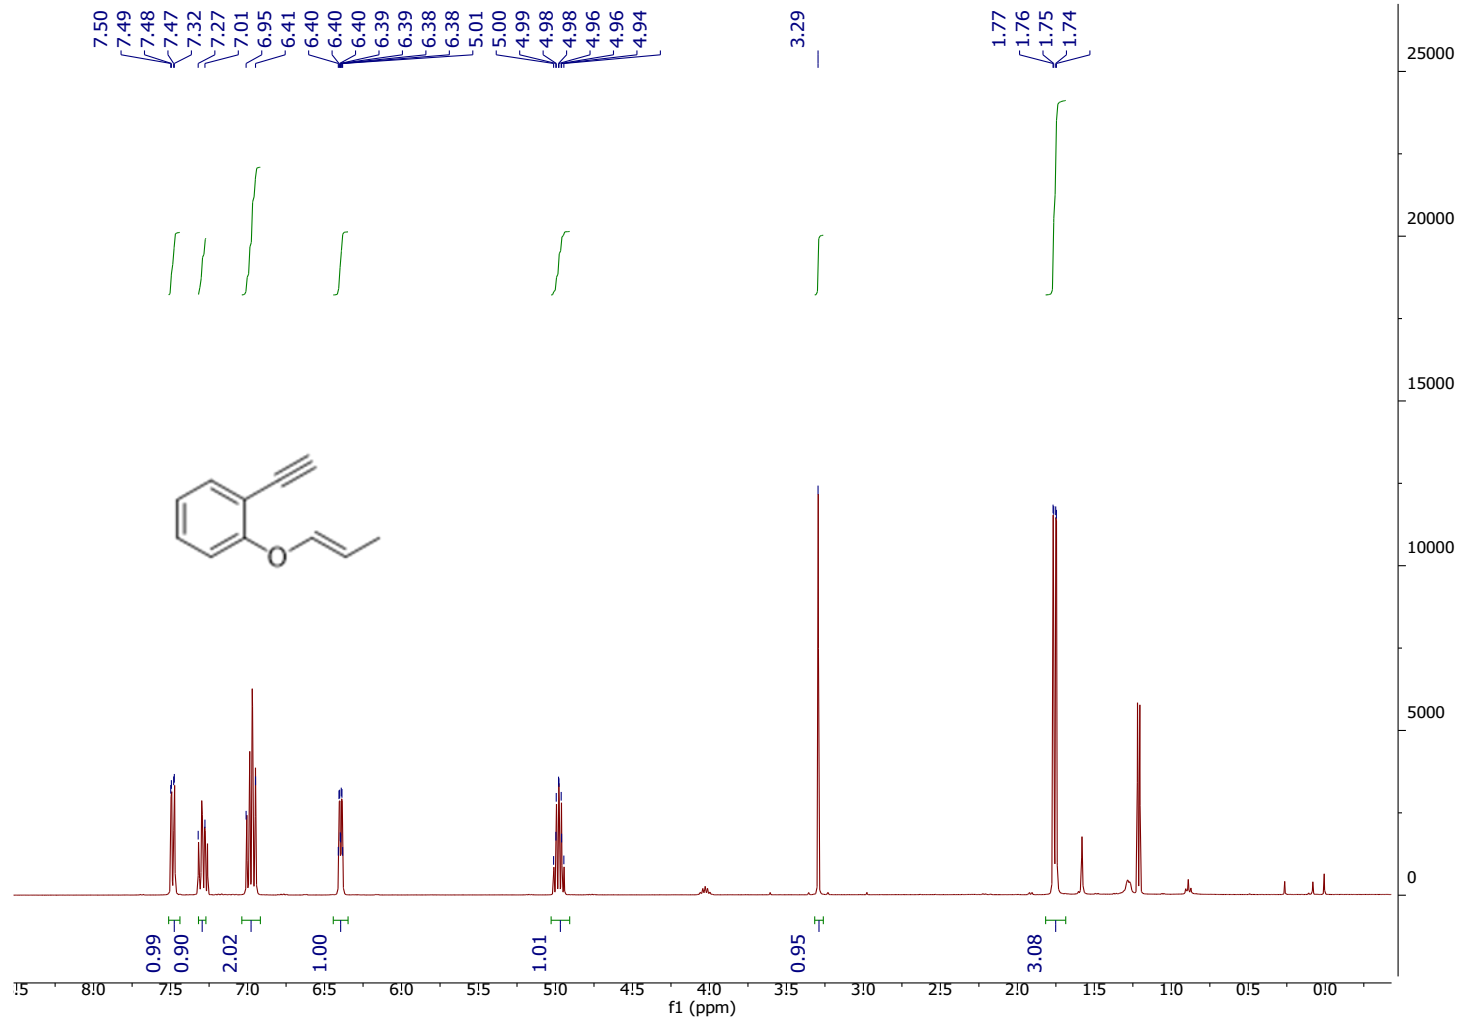



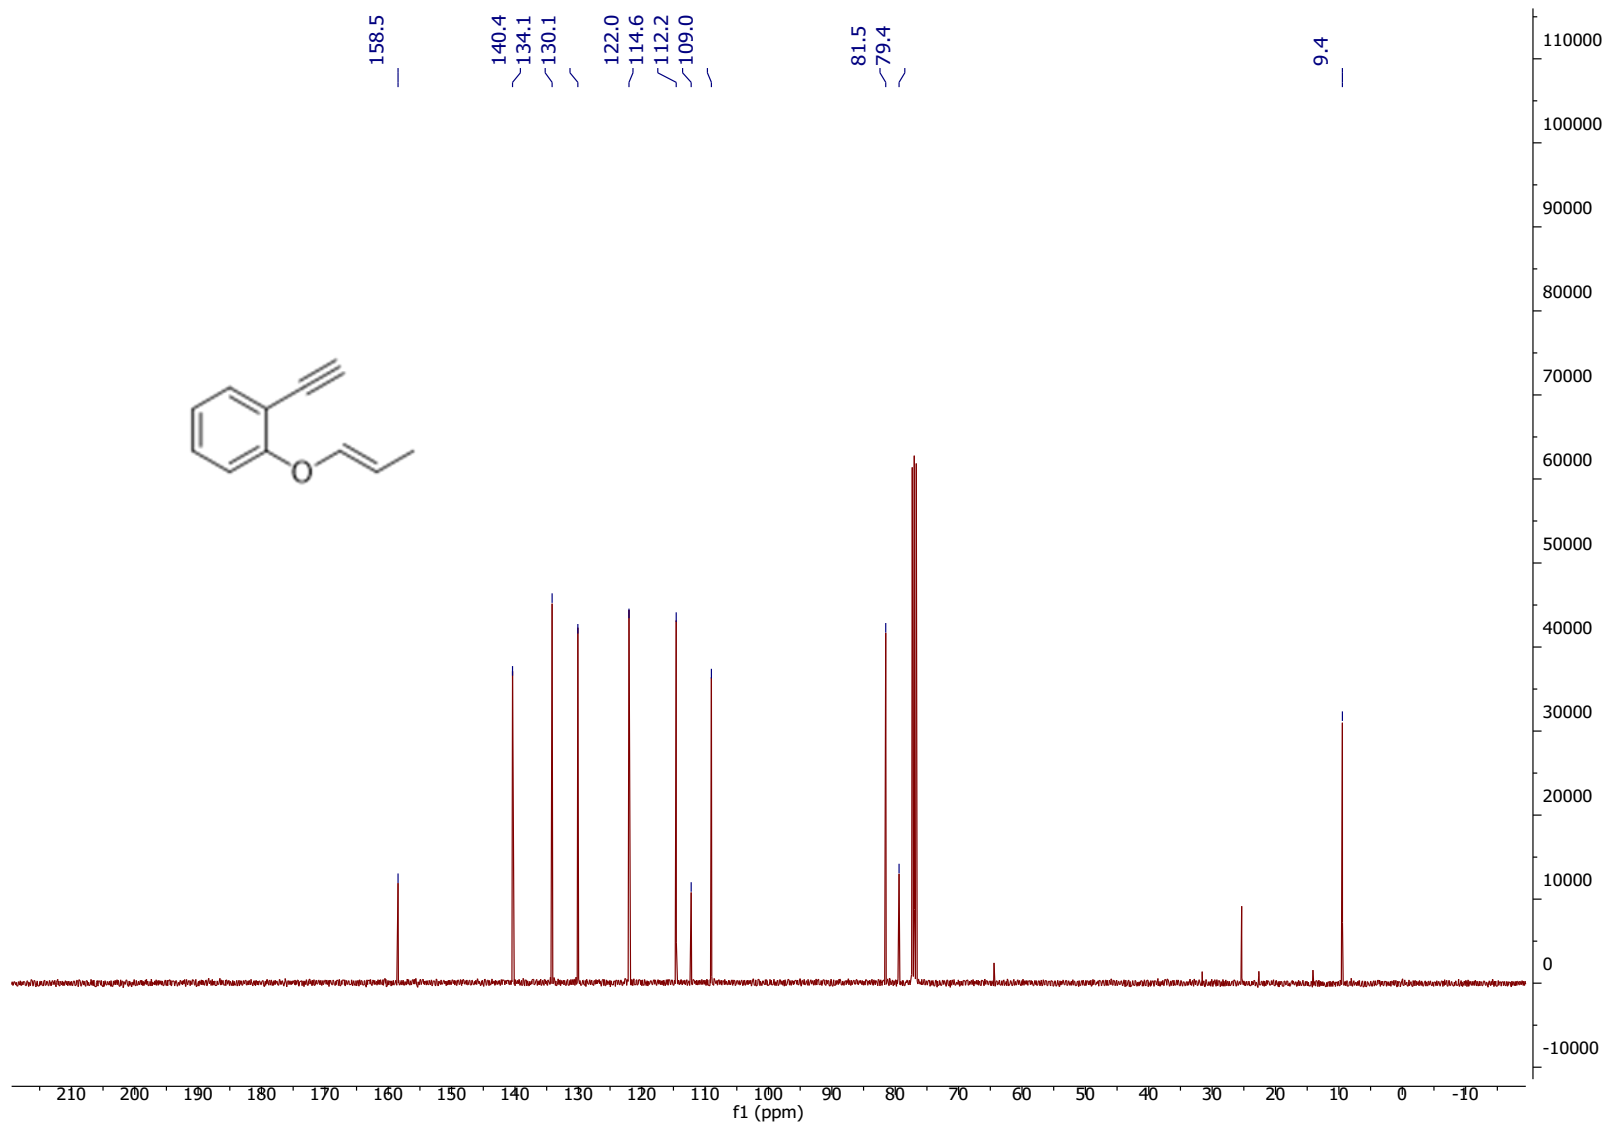

1j: 1-ethynyl-2-((2-methylprop-1-en-1-yl)oxy)benzene

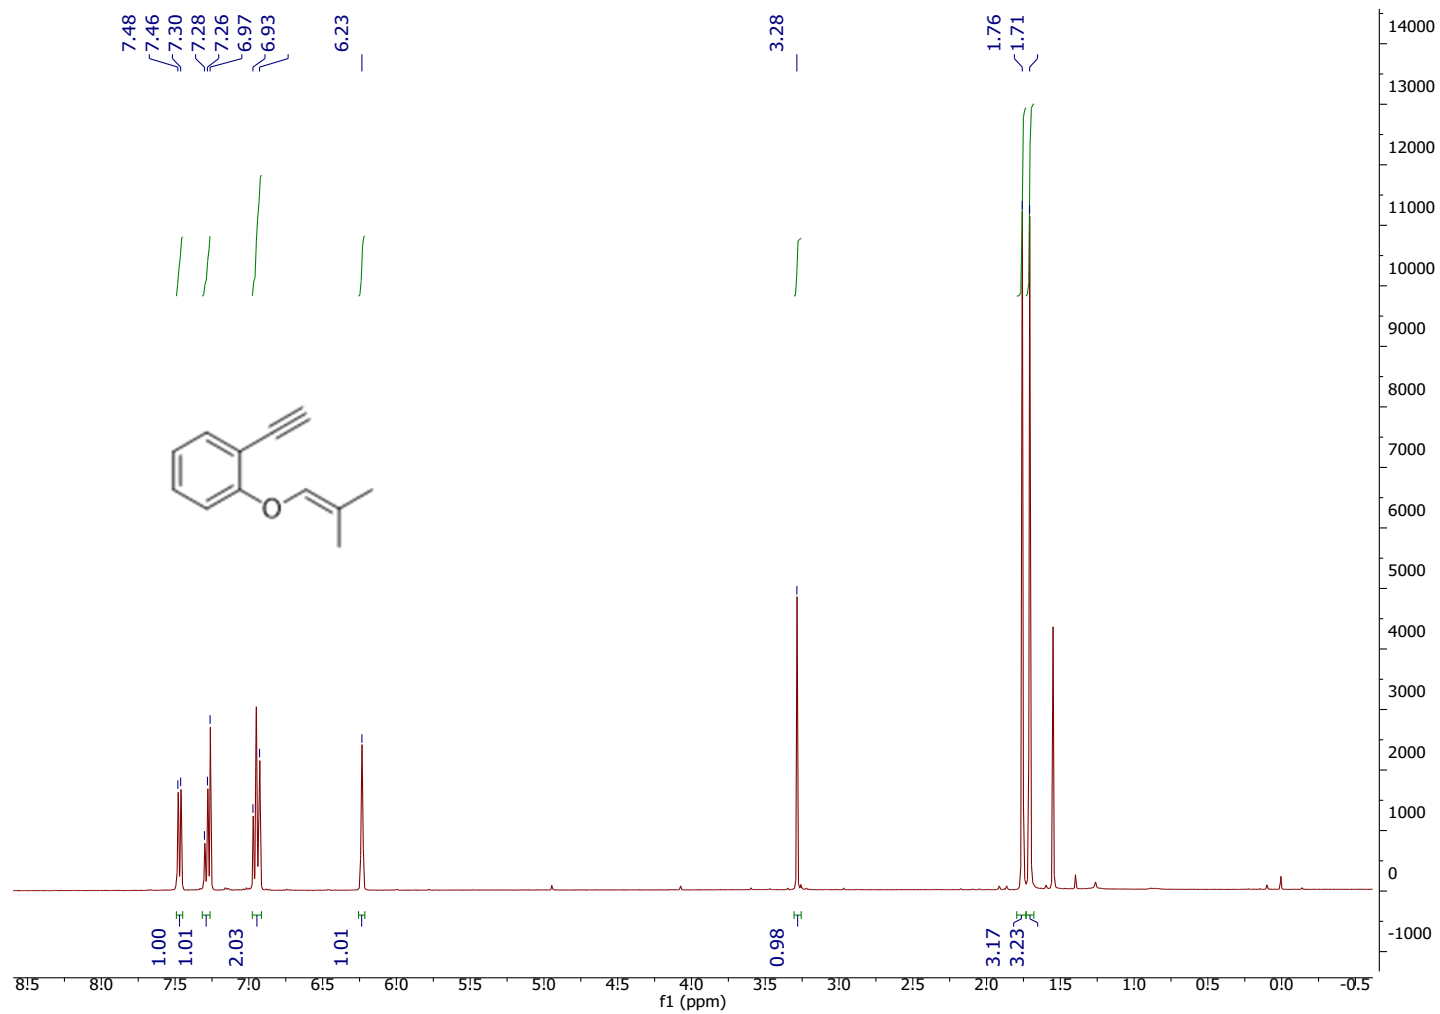

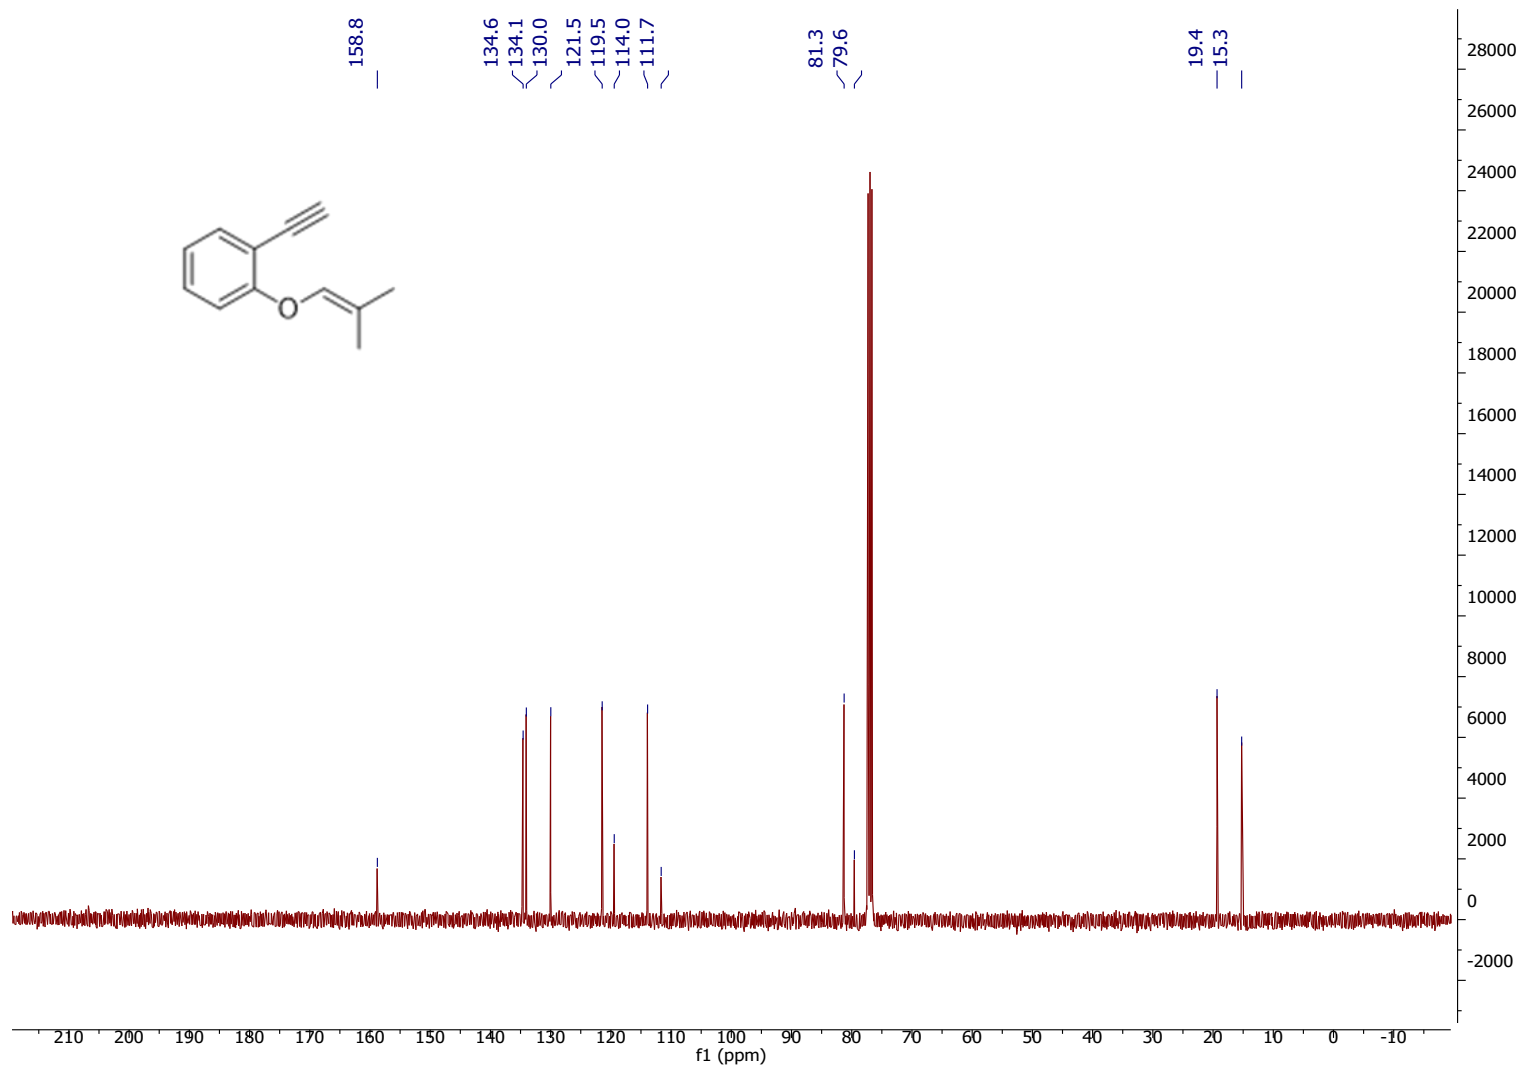

1k: *tert*-butyldimethyl((3-(2-(vinylloxy)phenyl)prop-2-yn-1-yl)oxy)silane

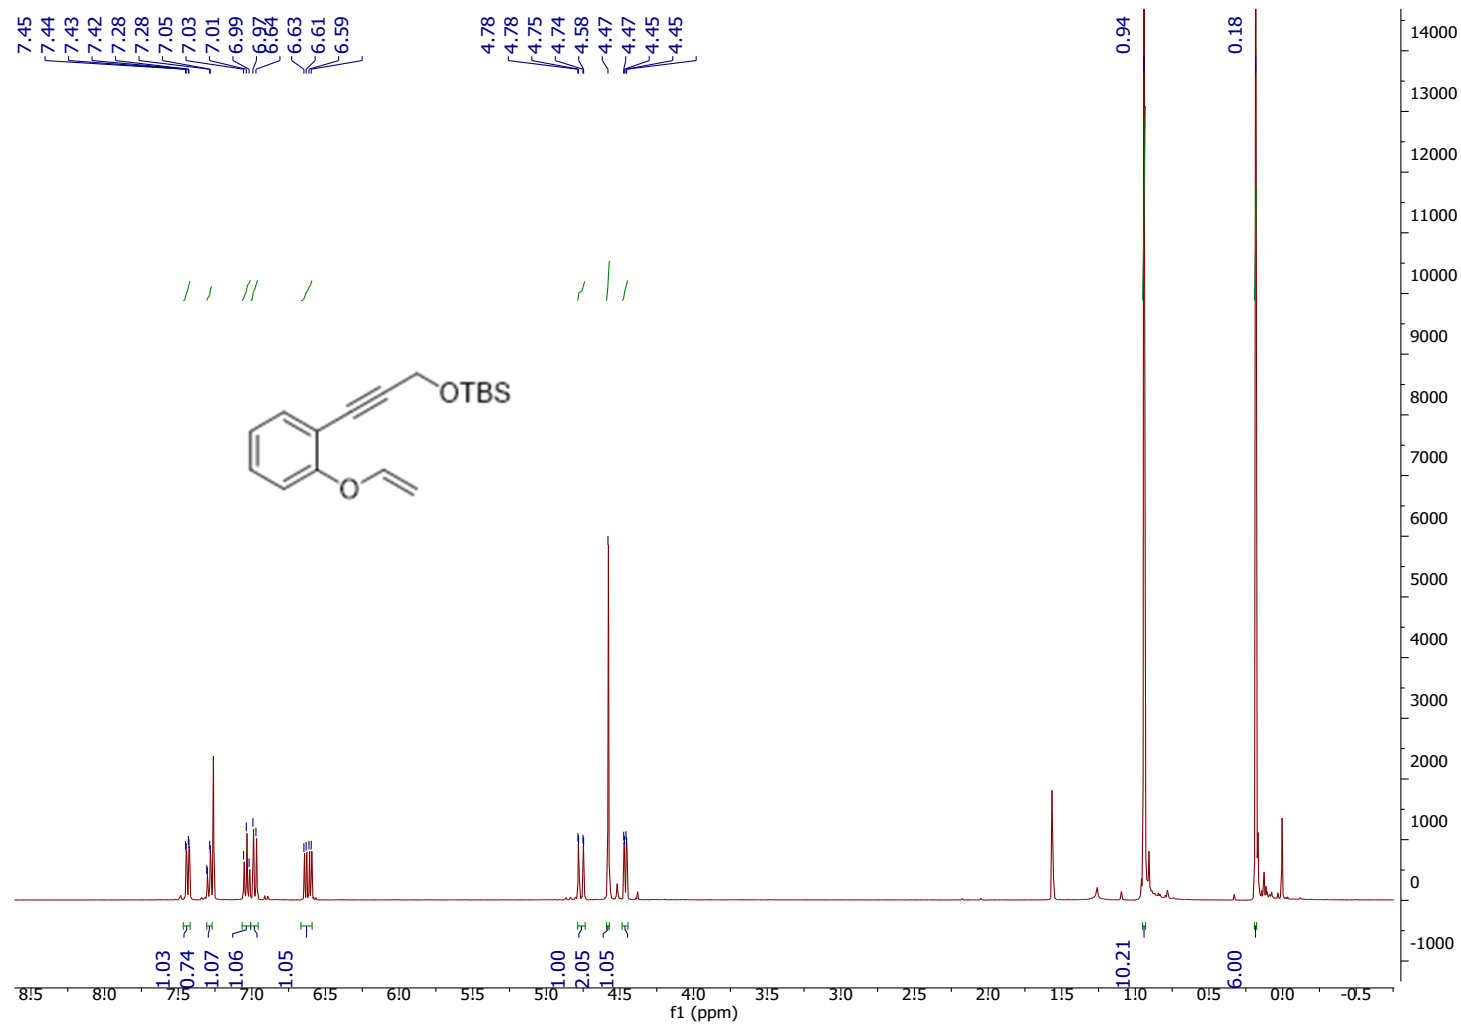

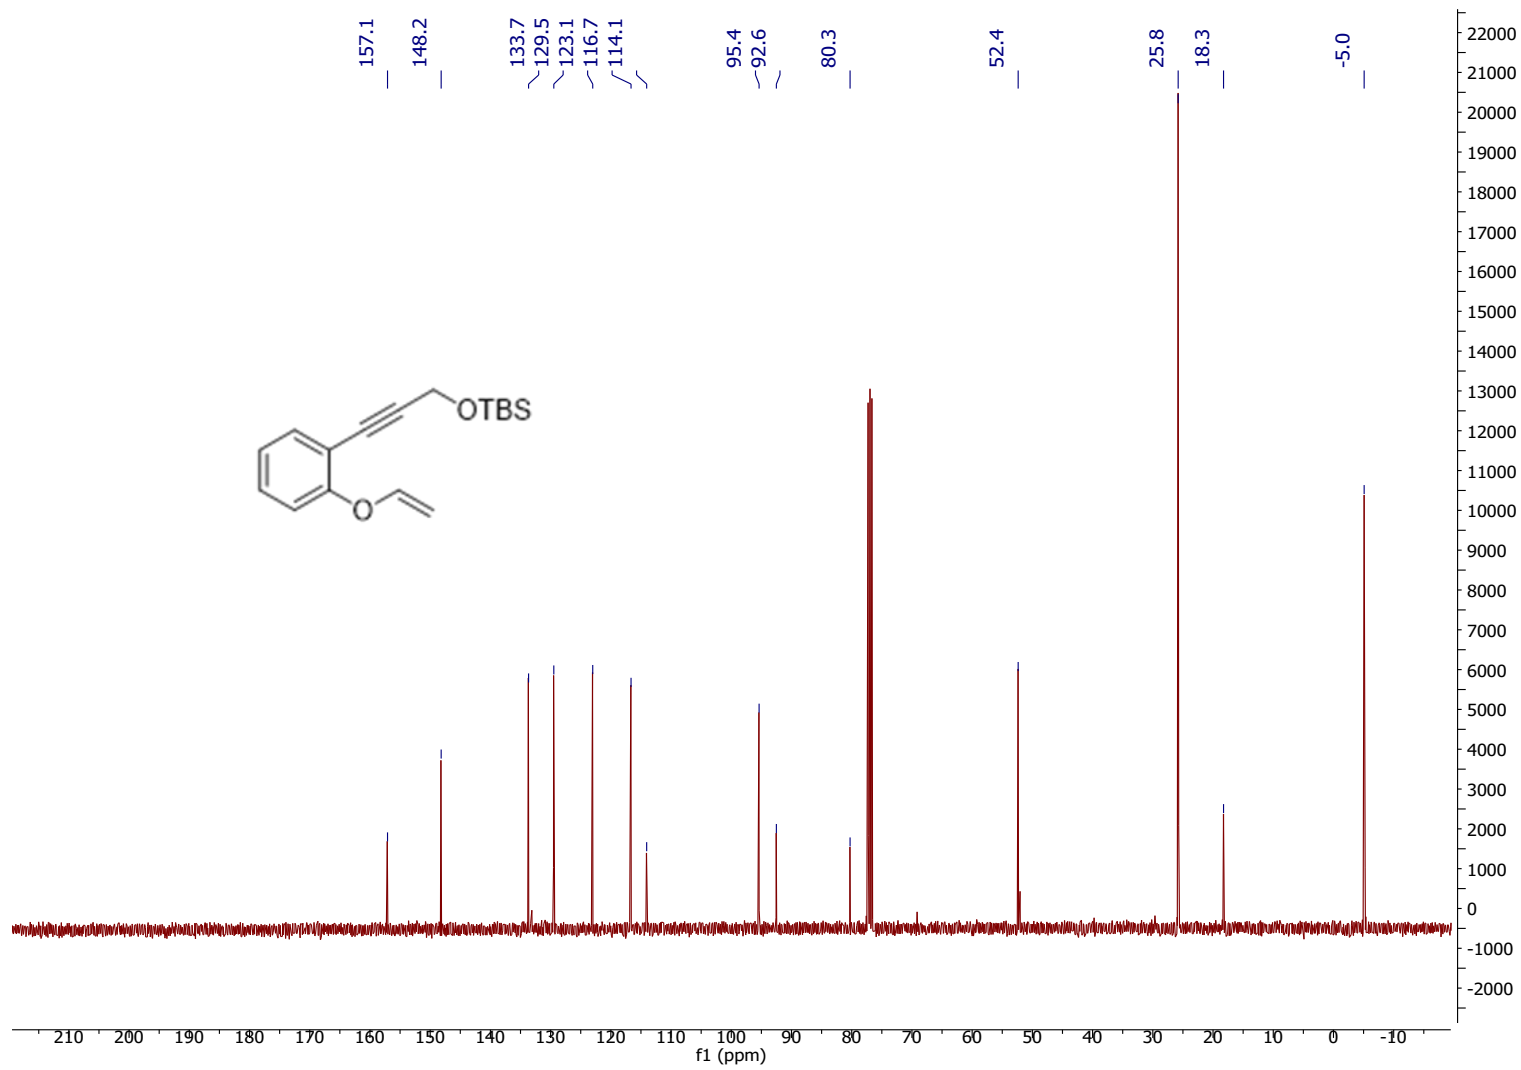

11: 1-(hex-1-yn-1-yl)-2-(vinylloxy)benzene

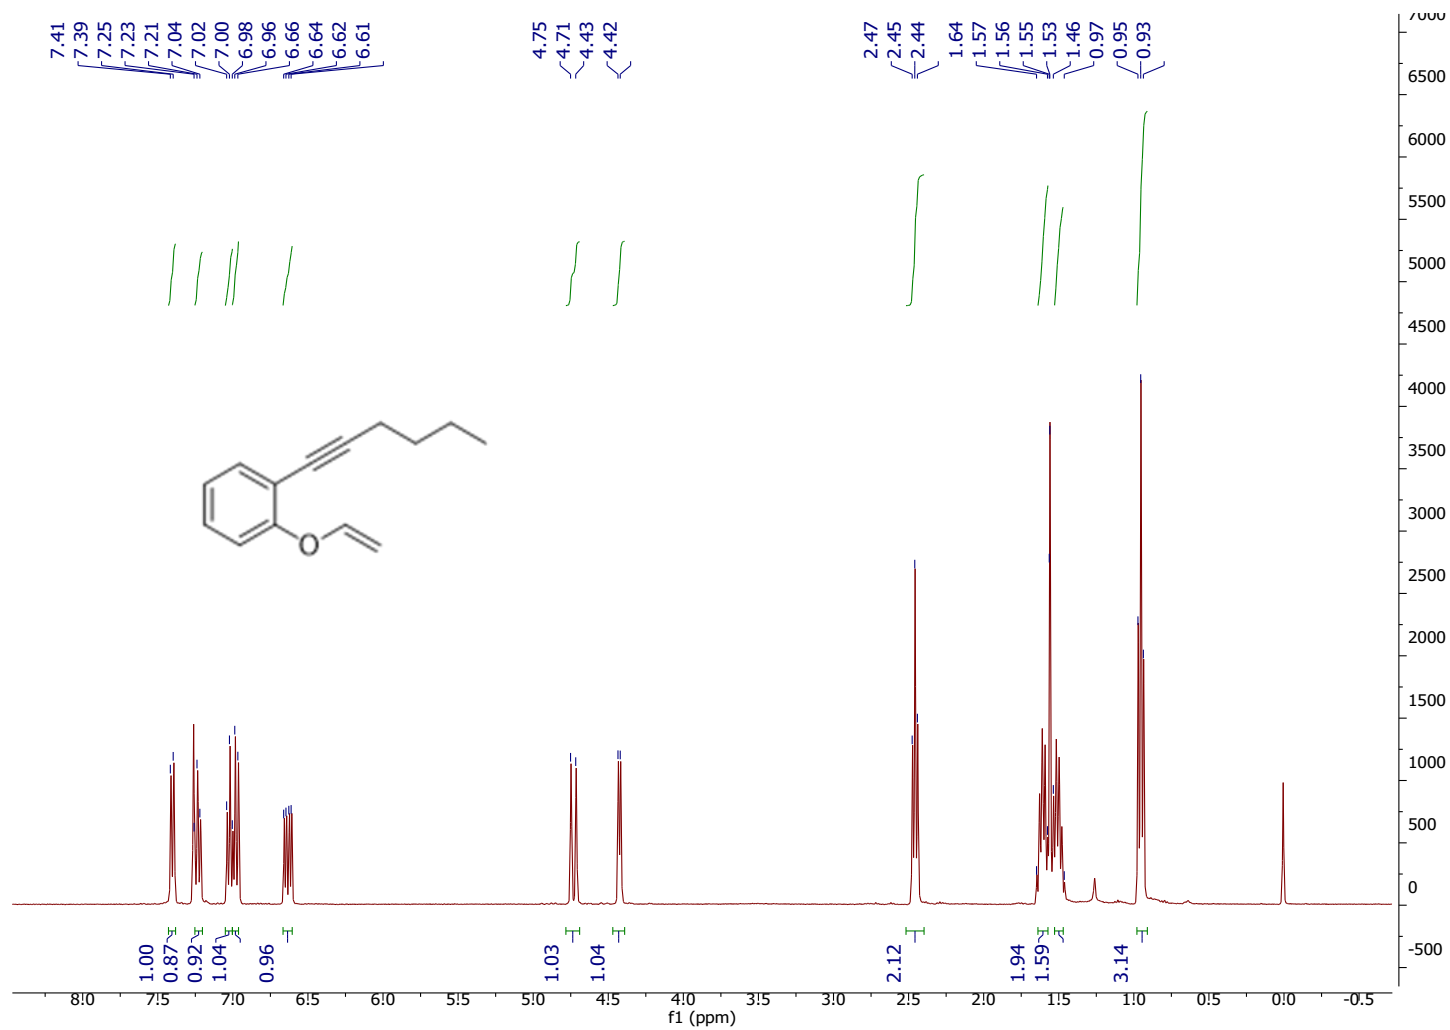

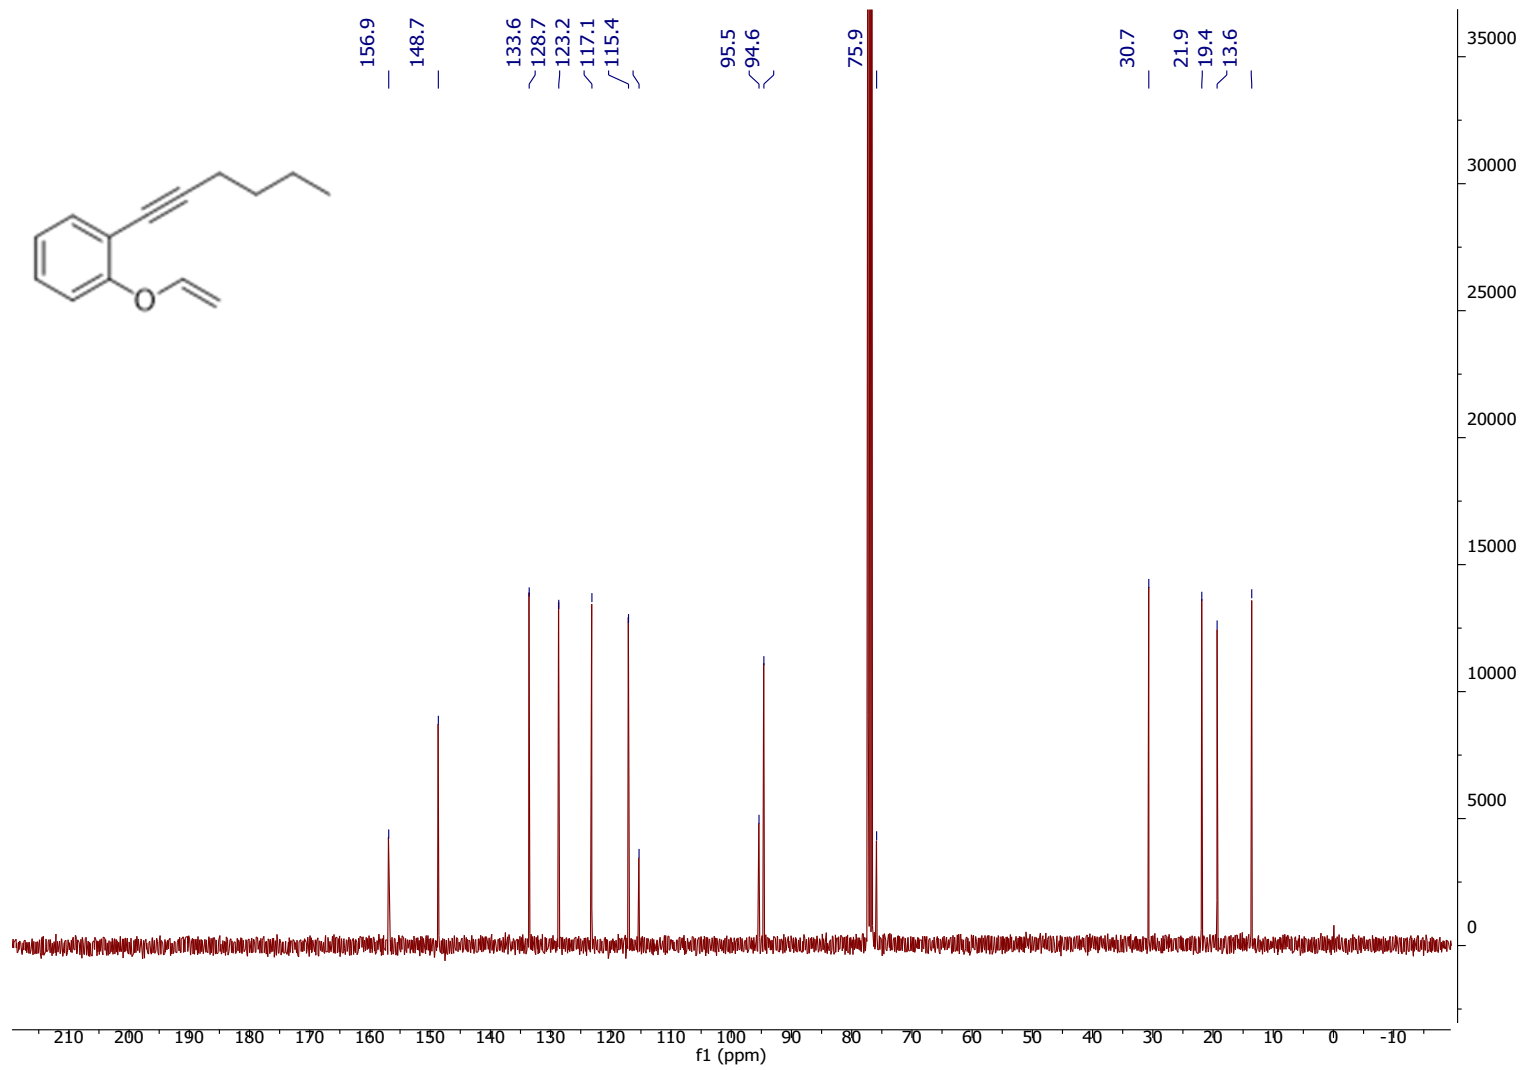

**1m:** *tert*-butyldimethyl((3-(2-(prop-1-en-2-yloxy)phenyl)prop-2-yn-1-yl)oxy)silane

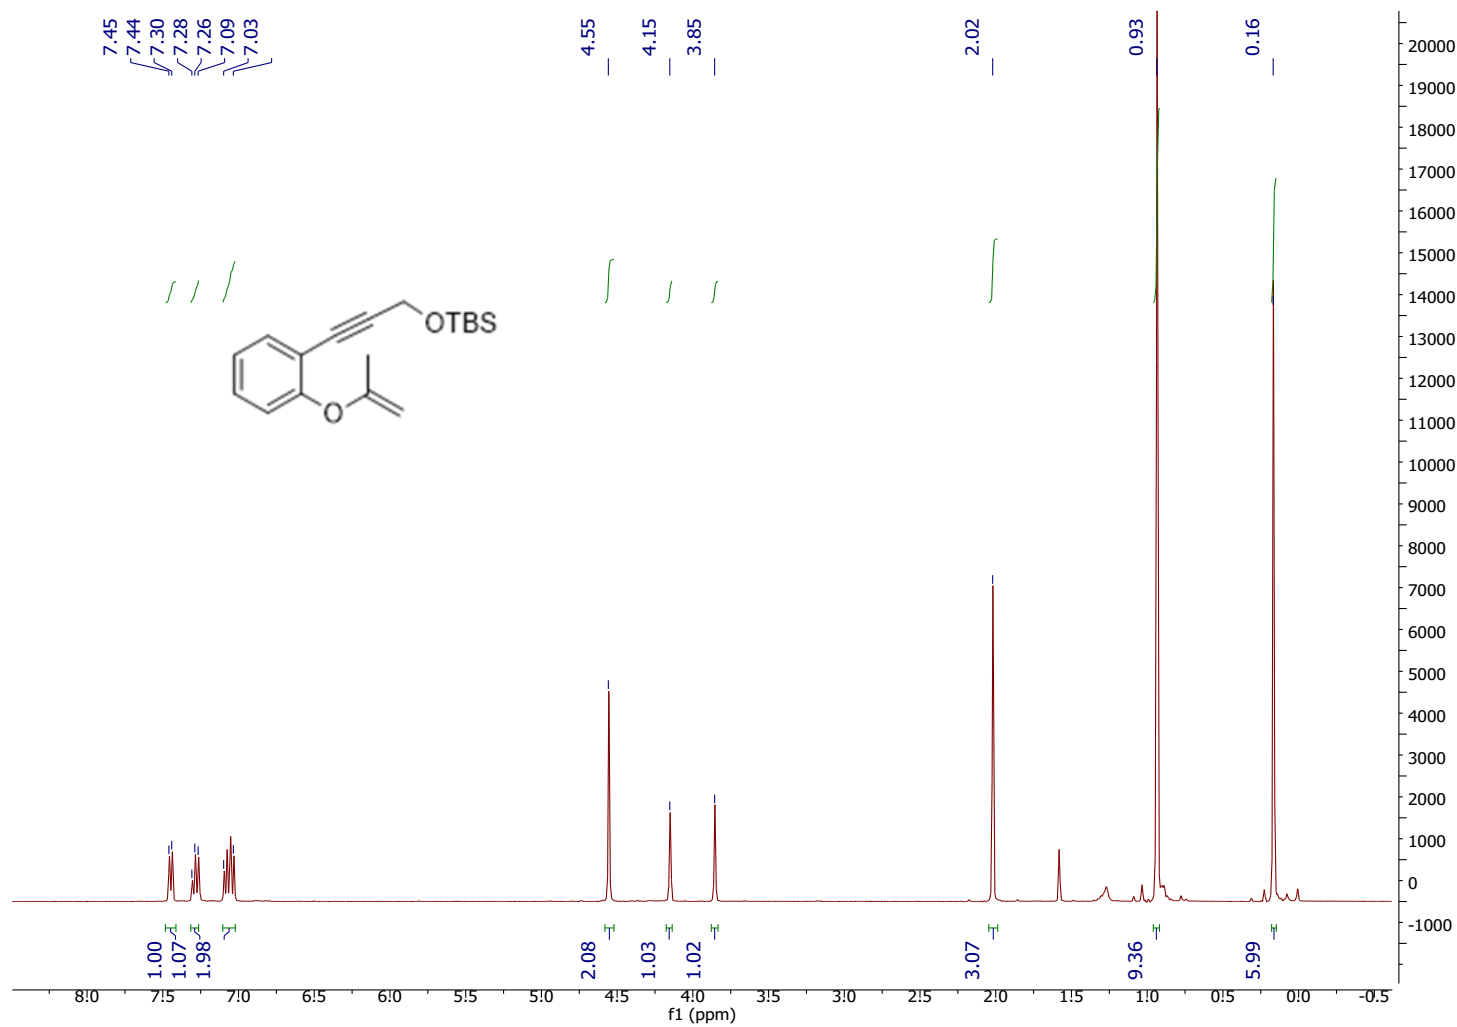



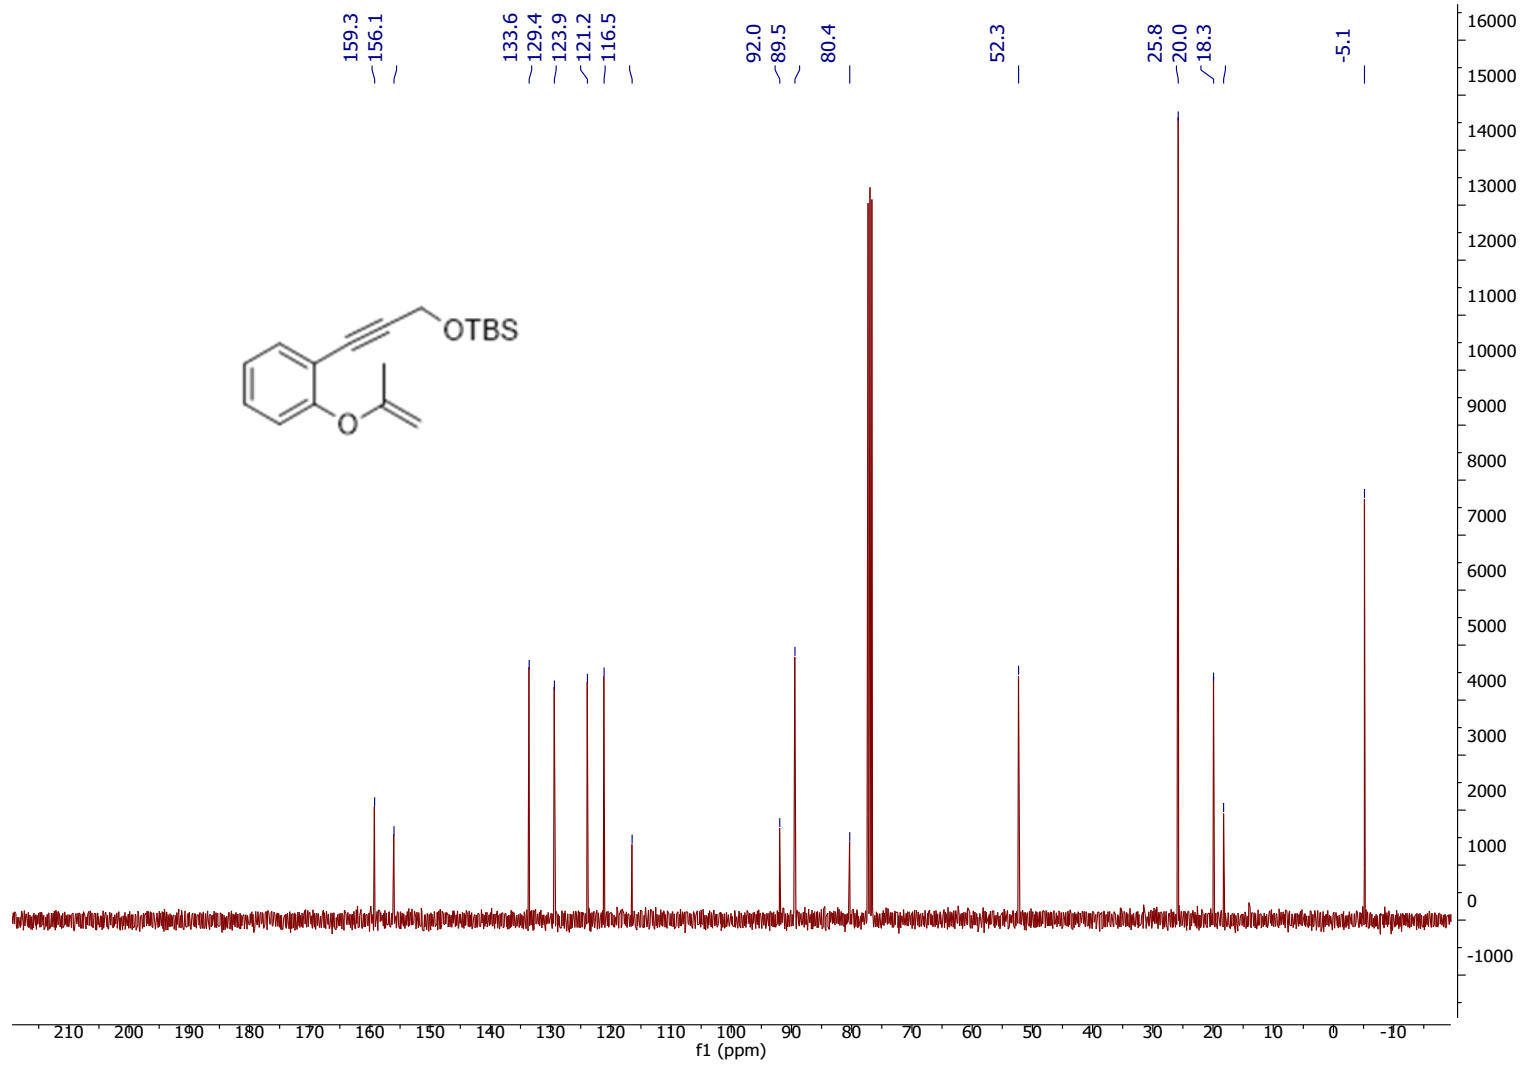

1n: 1-(3-(benzyloxy)prop-1-yn-1-yl)-2-(prop-1-en-2-yloxy)benzene

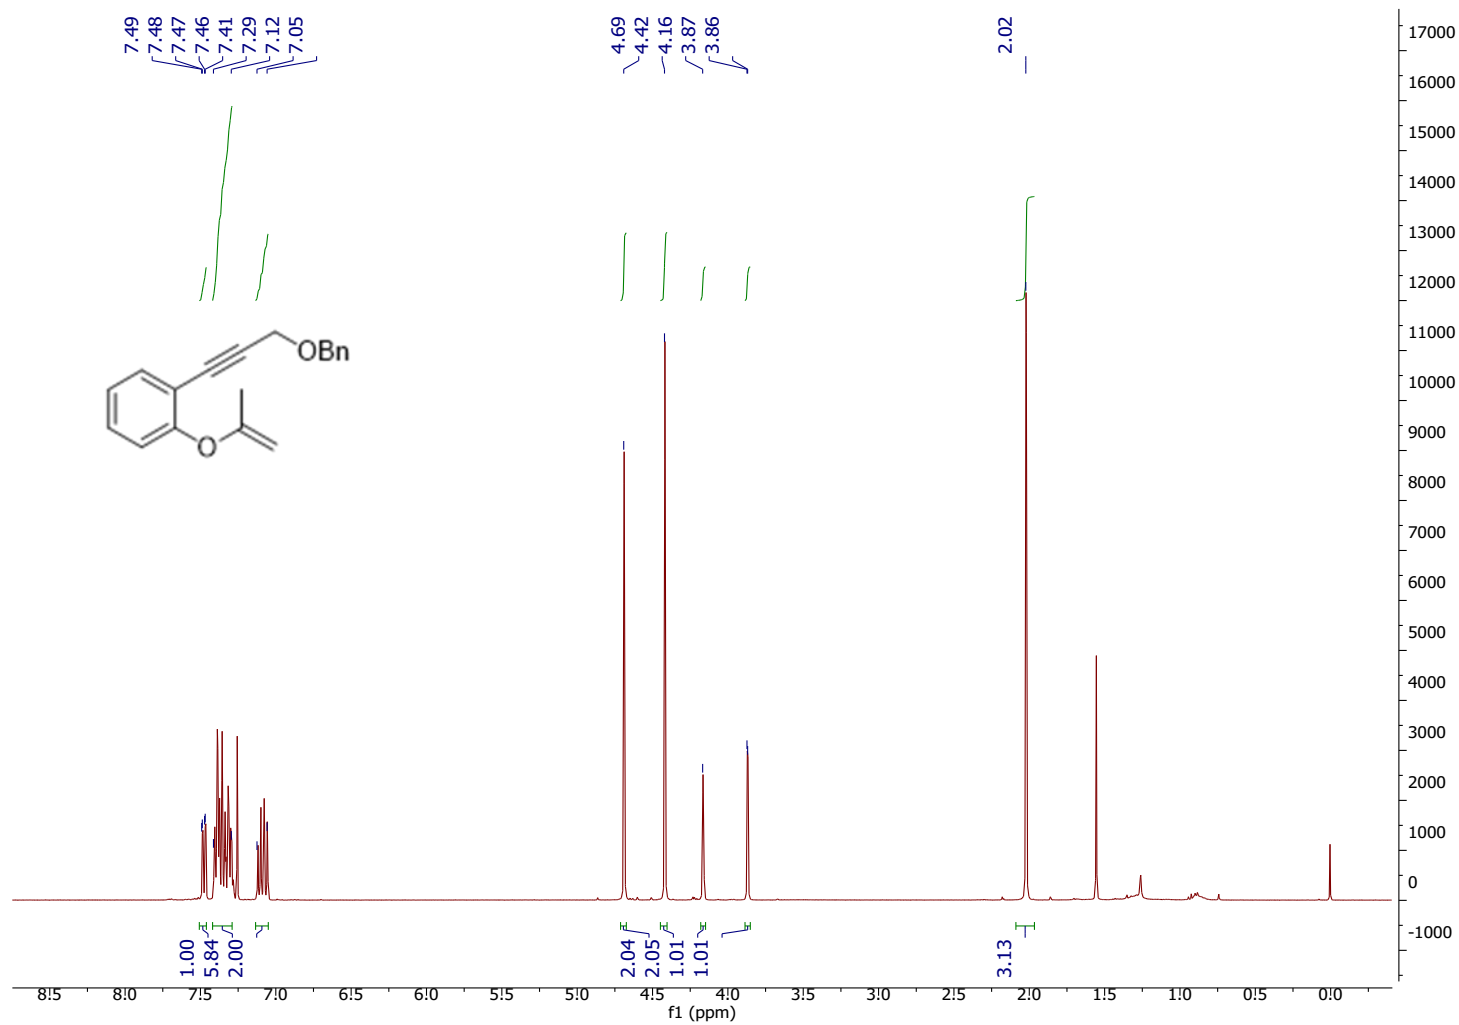

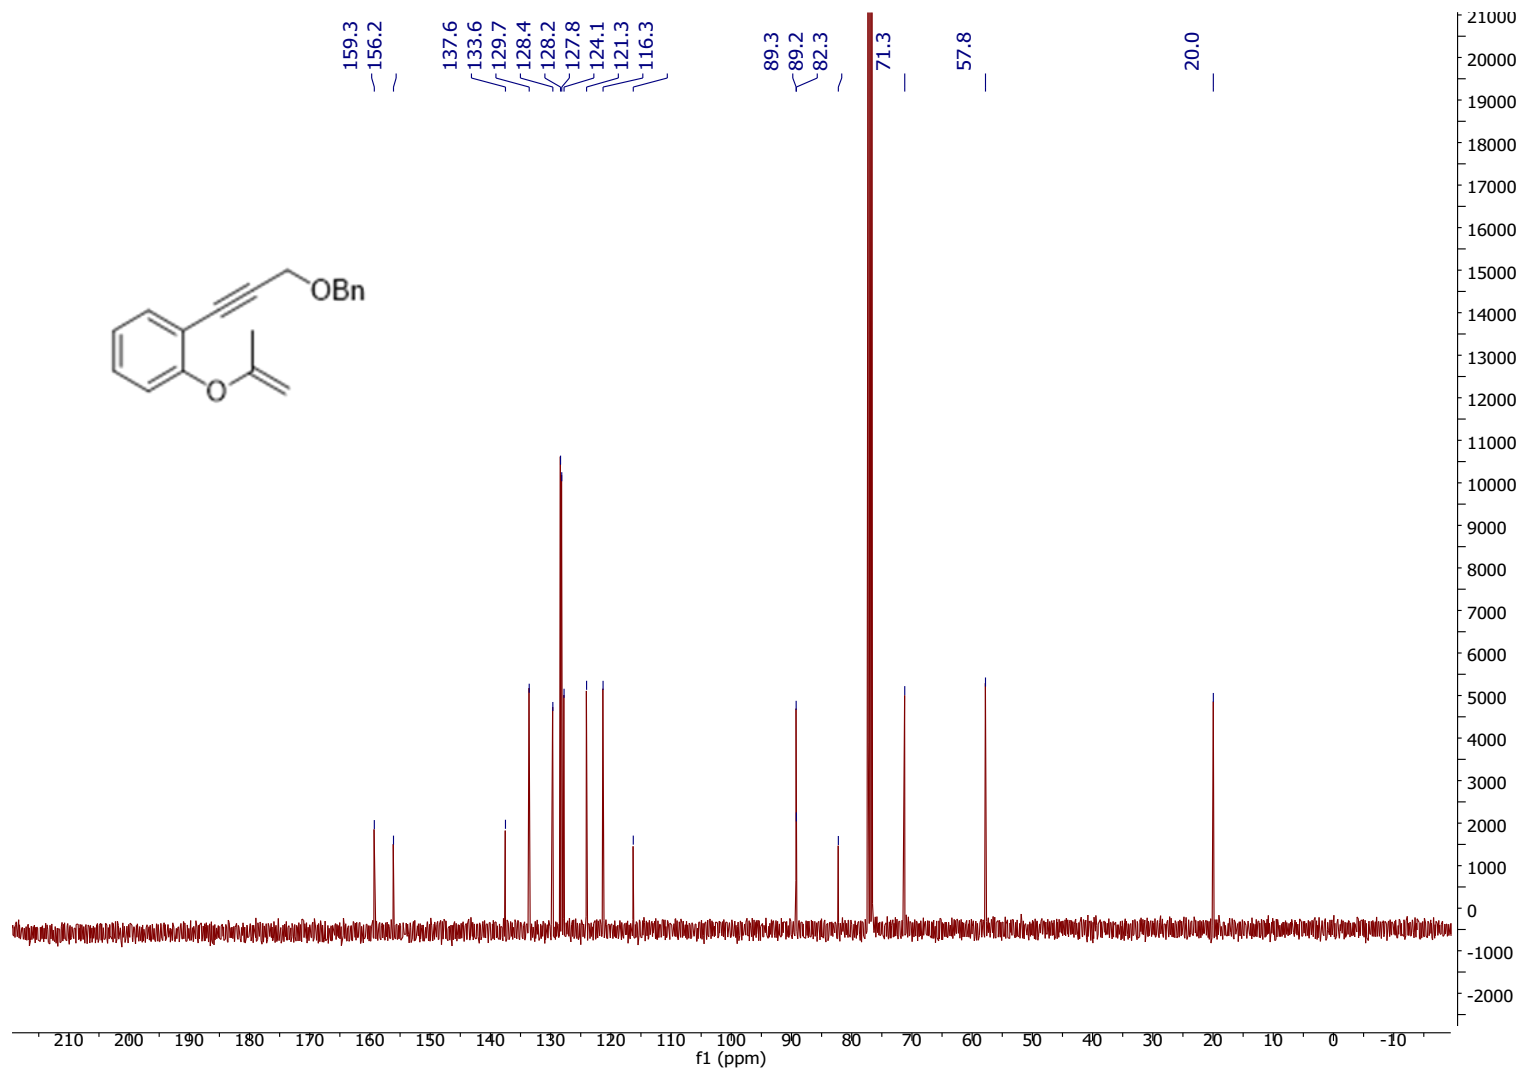

1o: 1-(hex-1-yn-1-yl)-2-(prop-1-en-2-yloxy)benzene

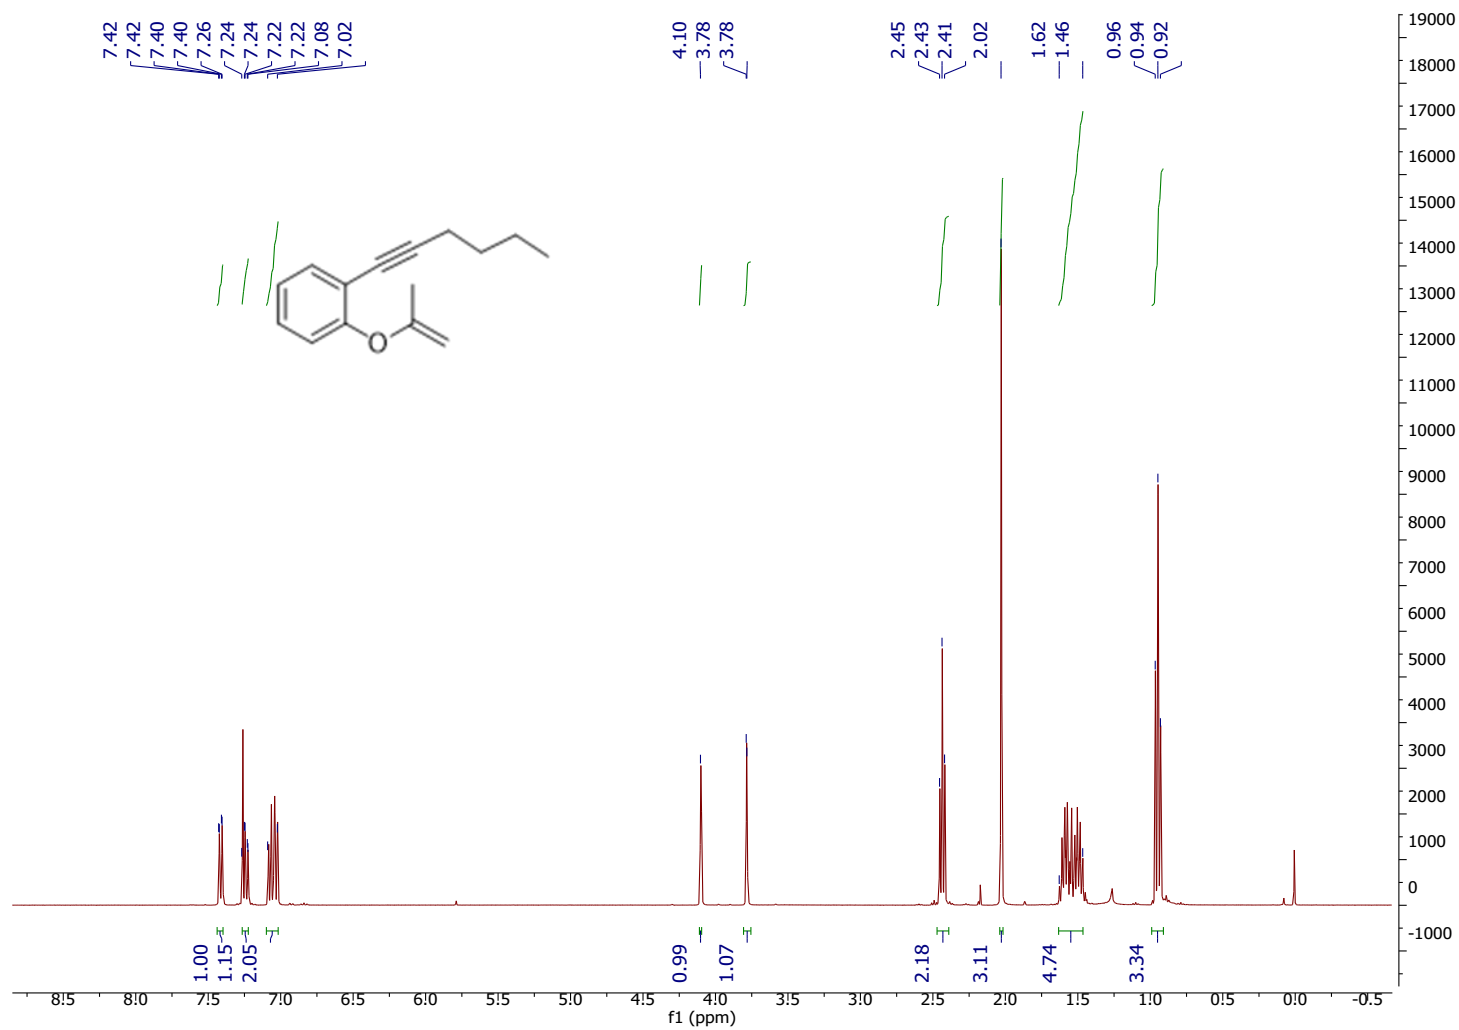

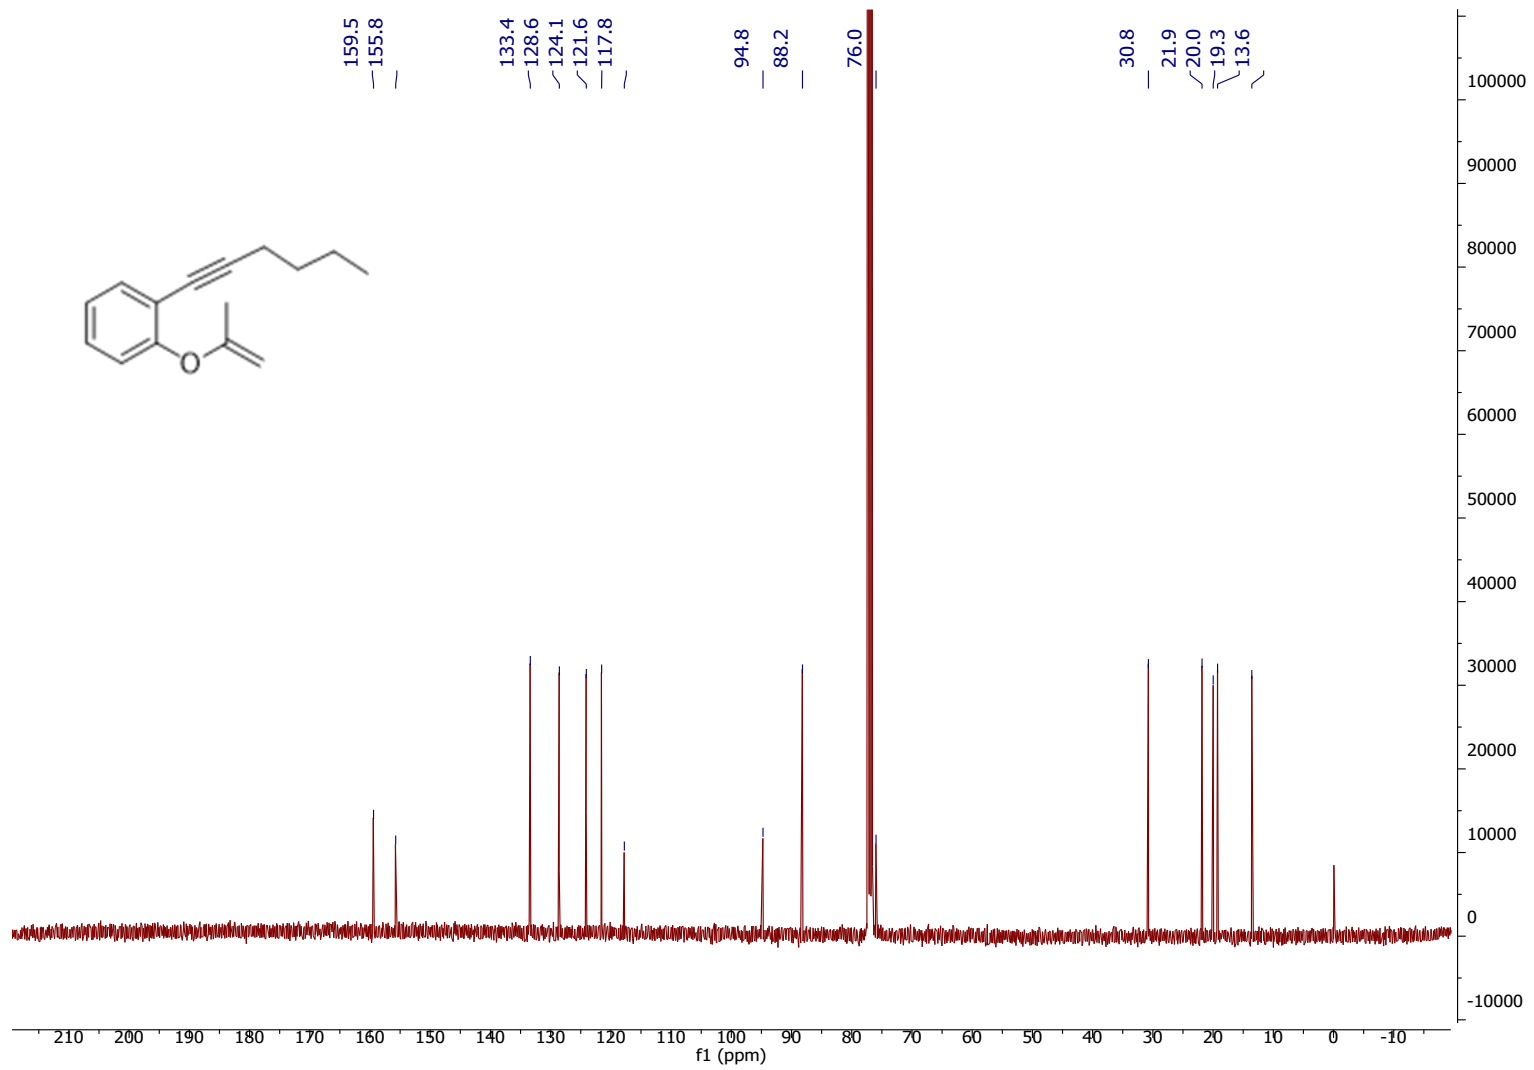

**1p:** 2-(4-(2-(prop-1-en-2-yloxy)phenyl)but-3-yn-1-yl)isoindoline-1,3-dione

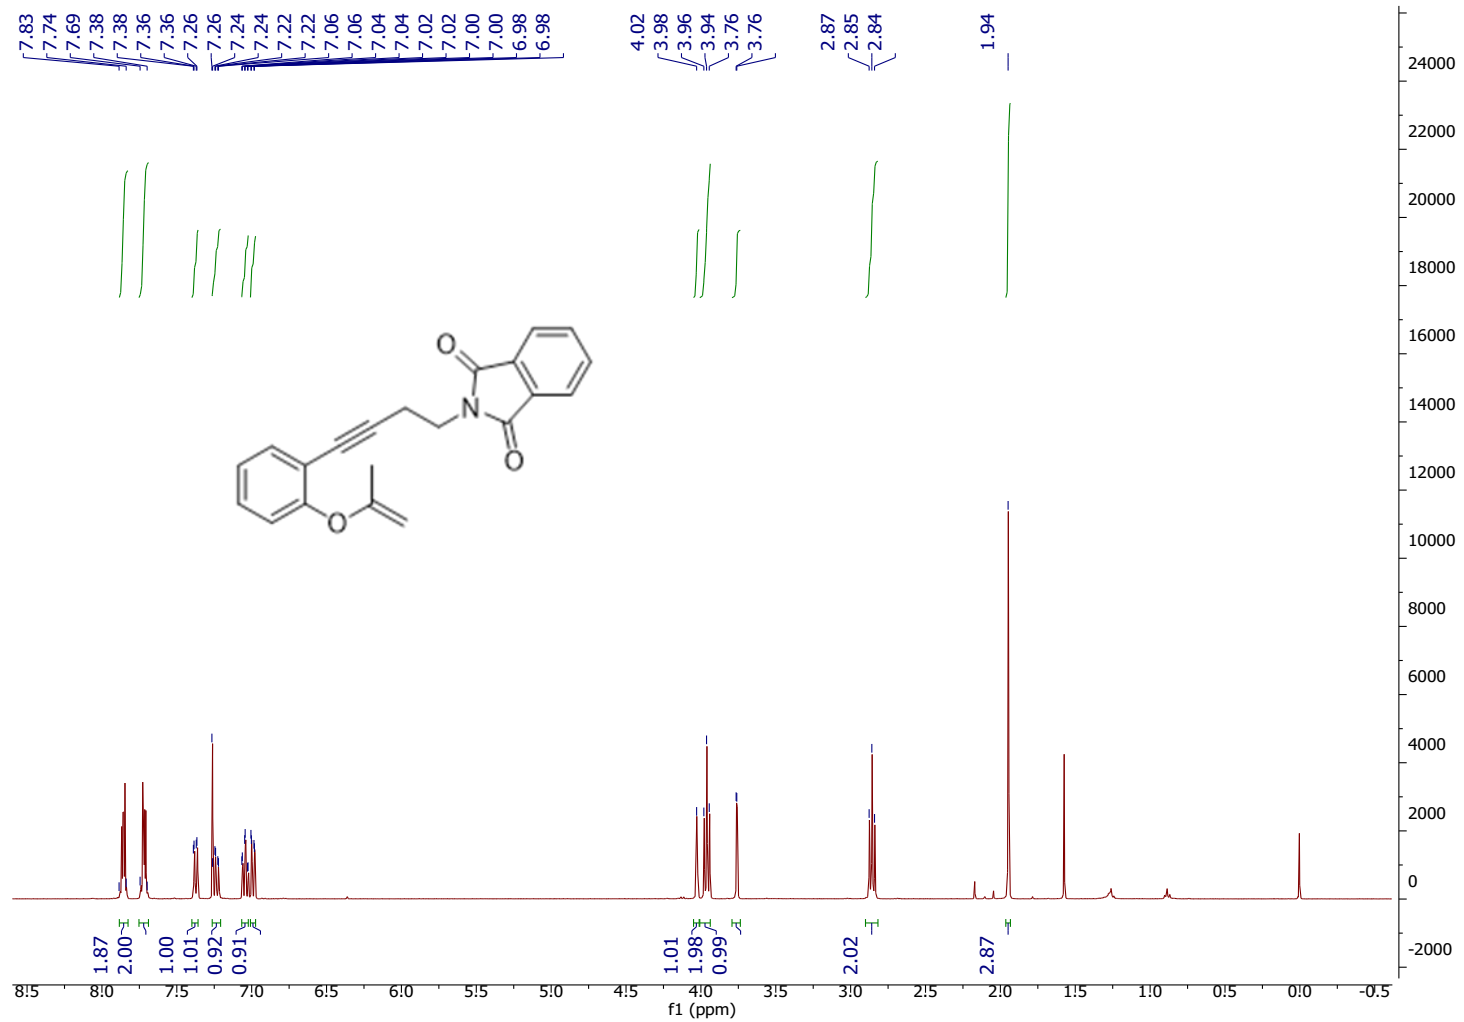

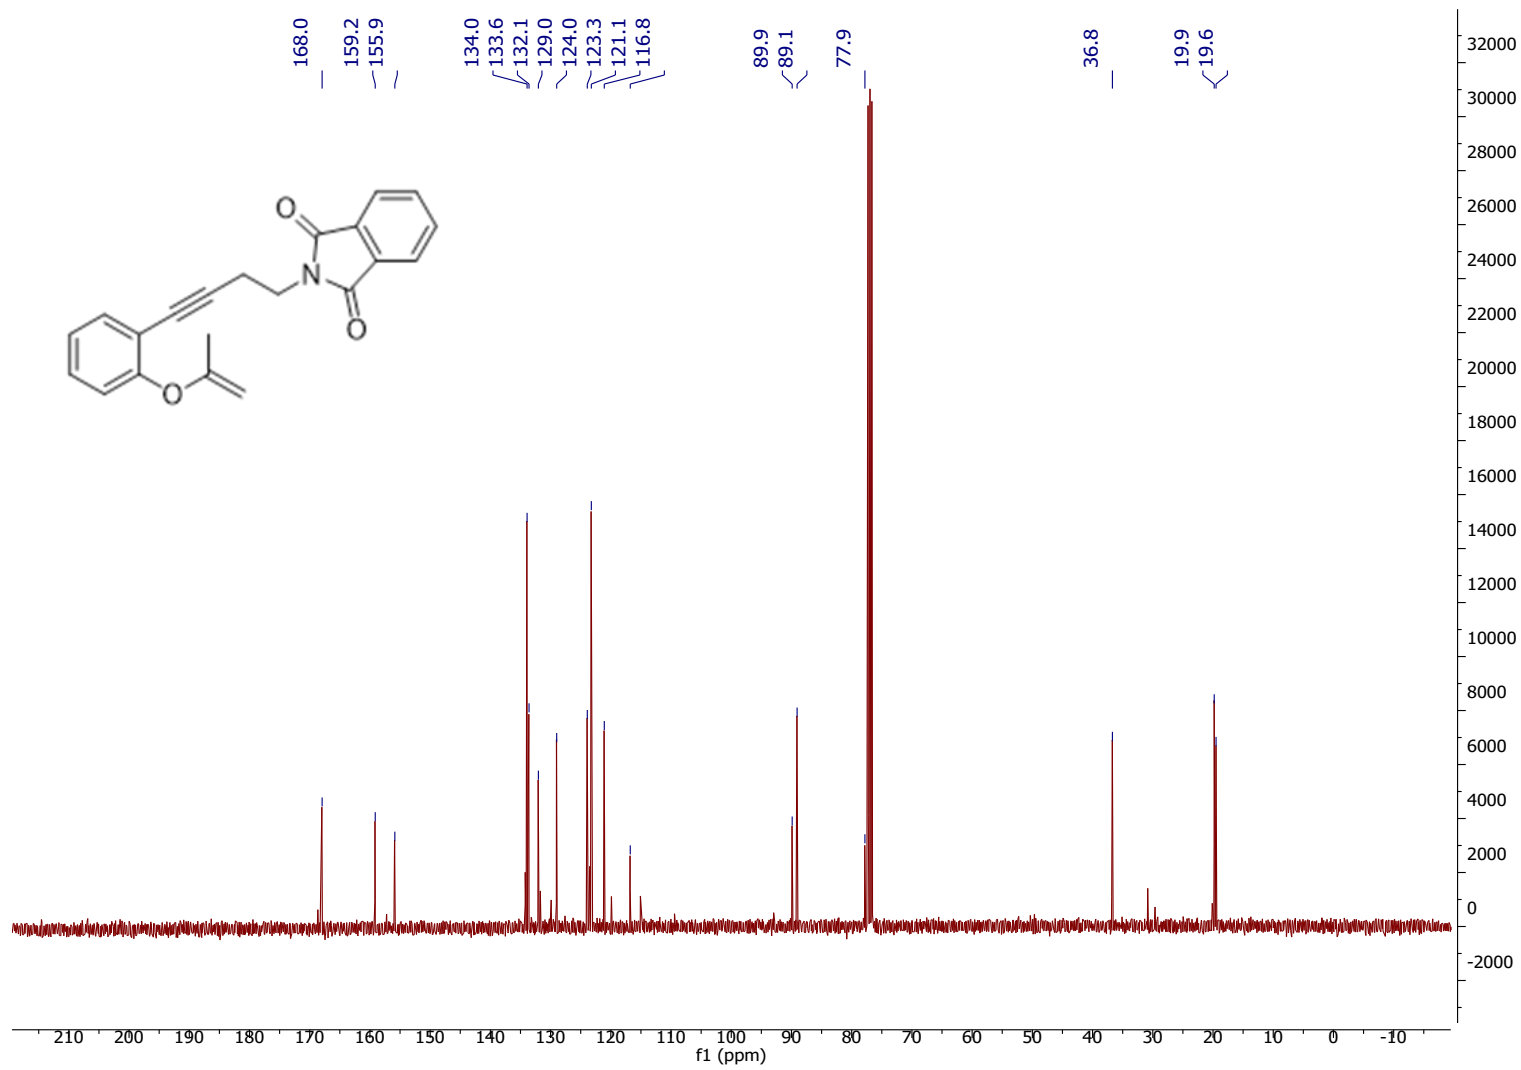

**1q:** *tert*-butyl((3-(5-methoxy-2-(prop-1-en-2-yloxy)phenyl)prop-2-yn-1-yl)oxy)dimethylsilane

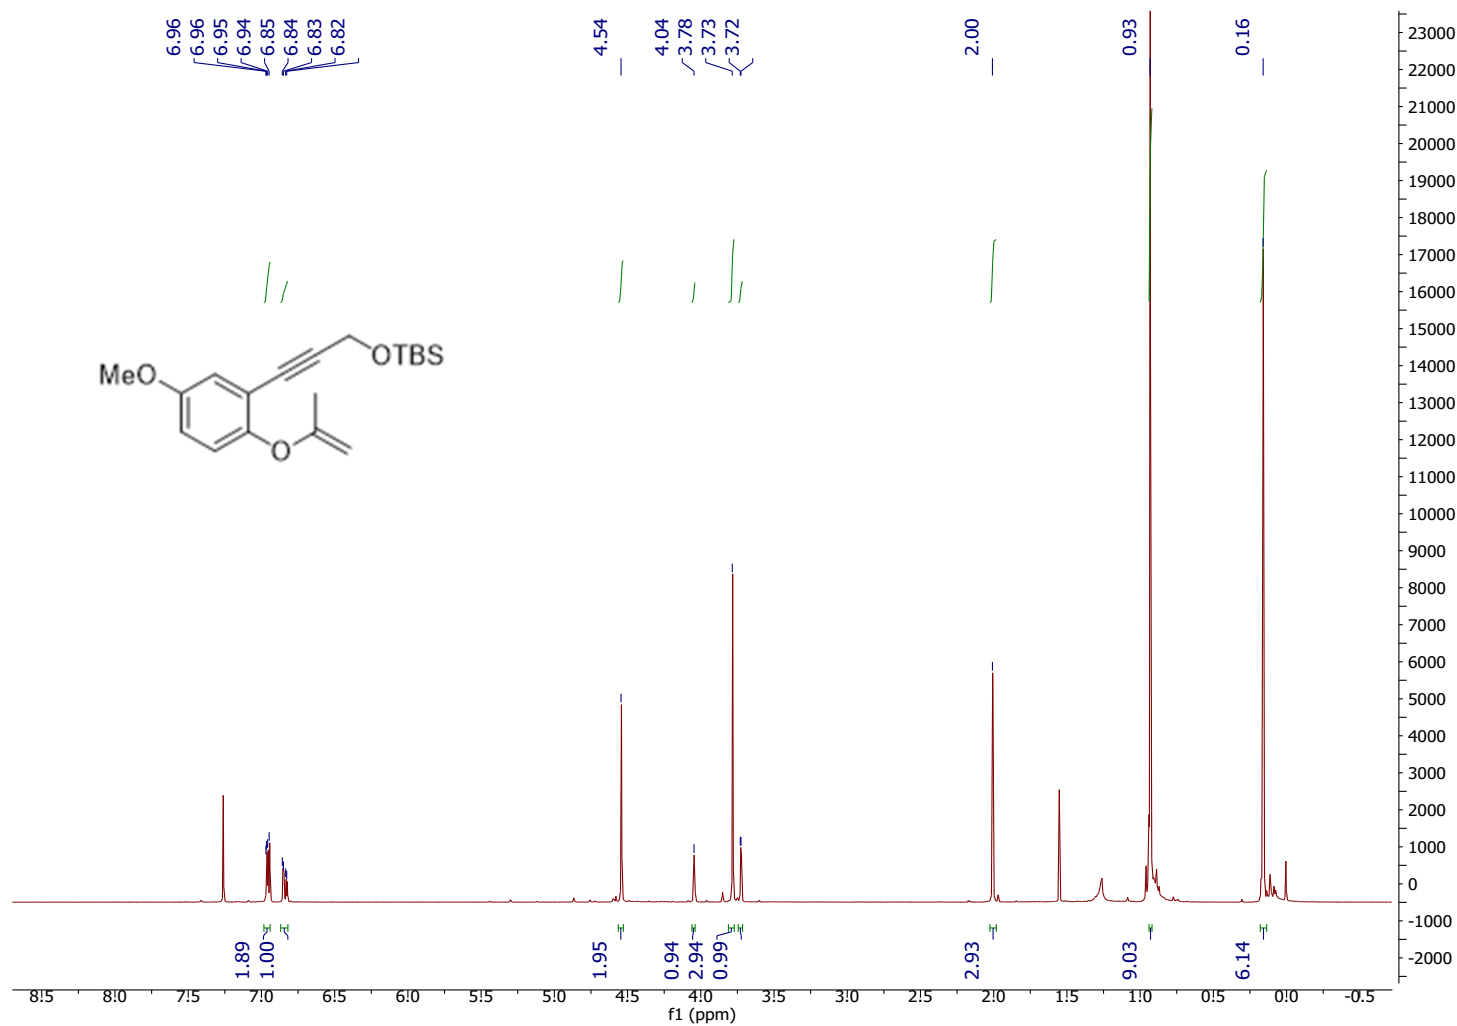



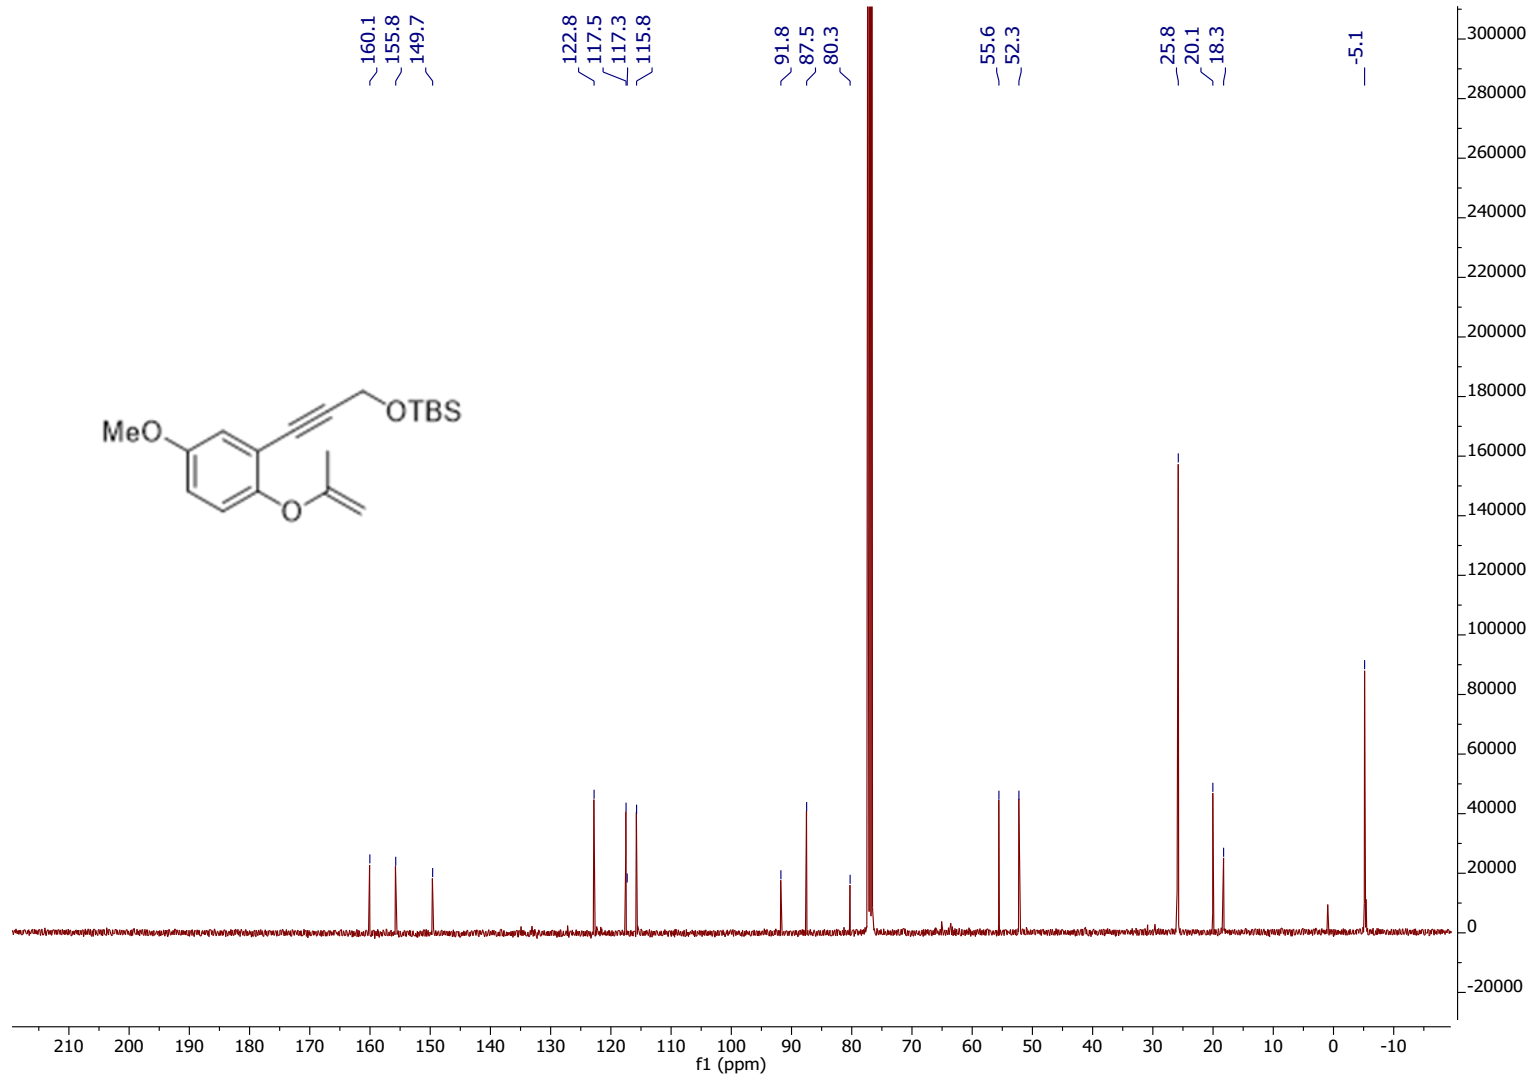

1r: 1-(4-bromobut-1-yn-1-yl)-2-(prop-1-en-2-yloxy)benzene

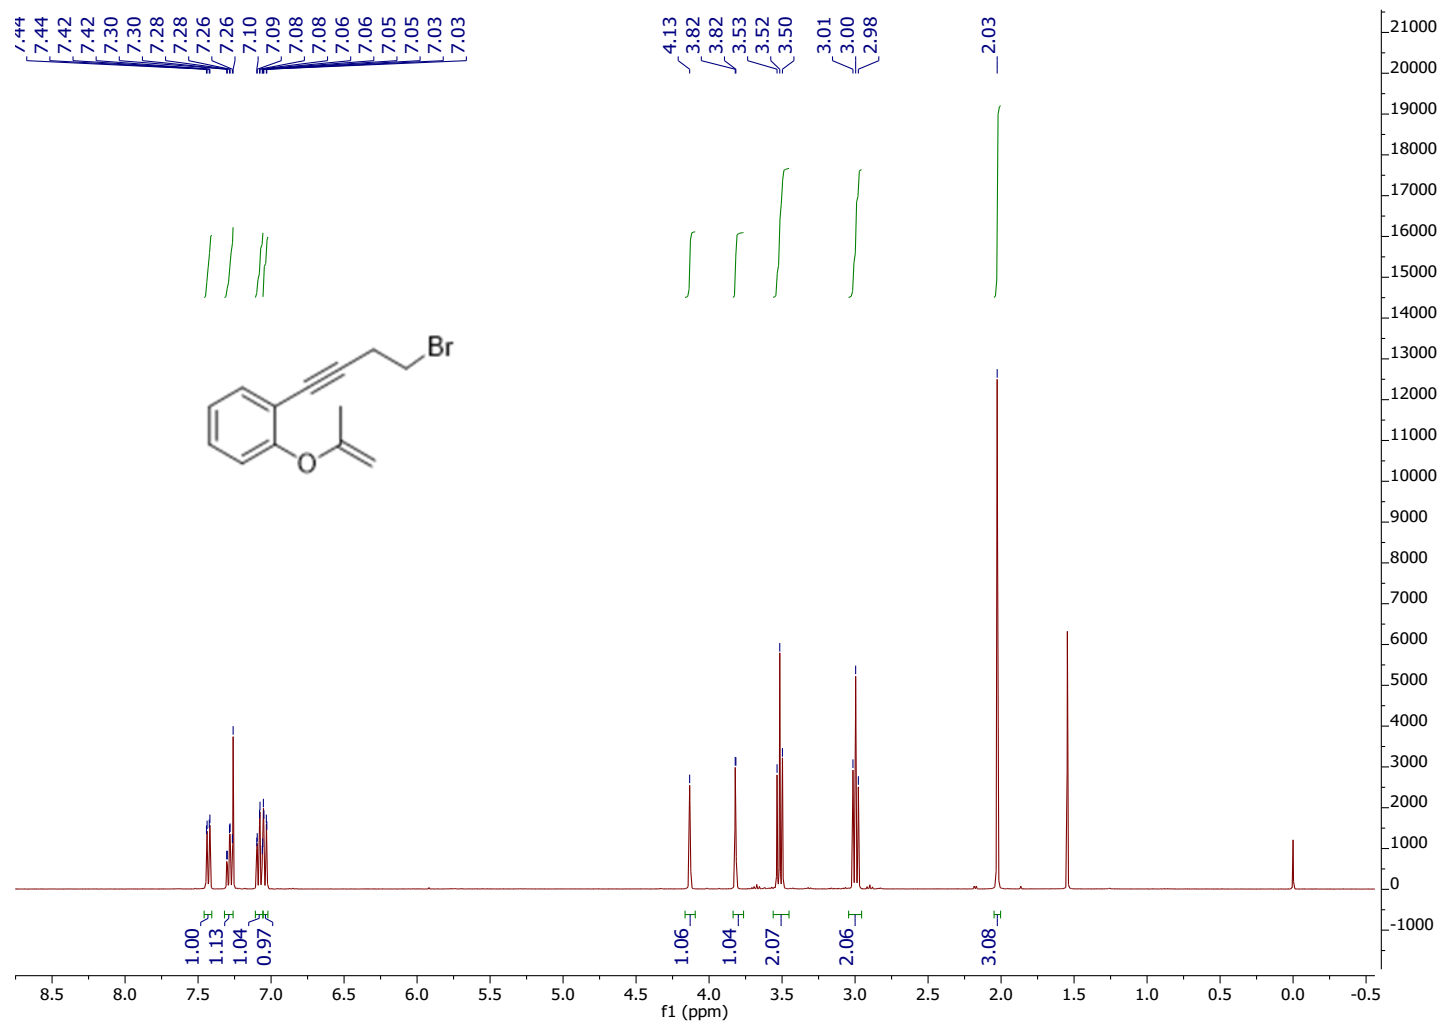

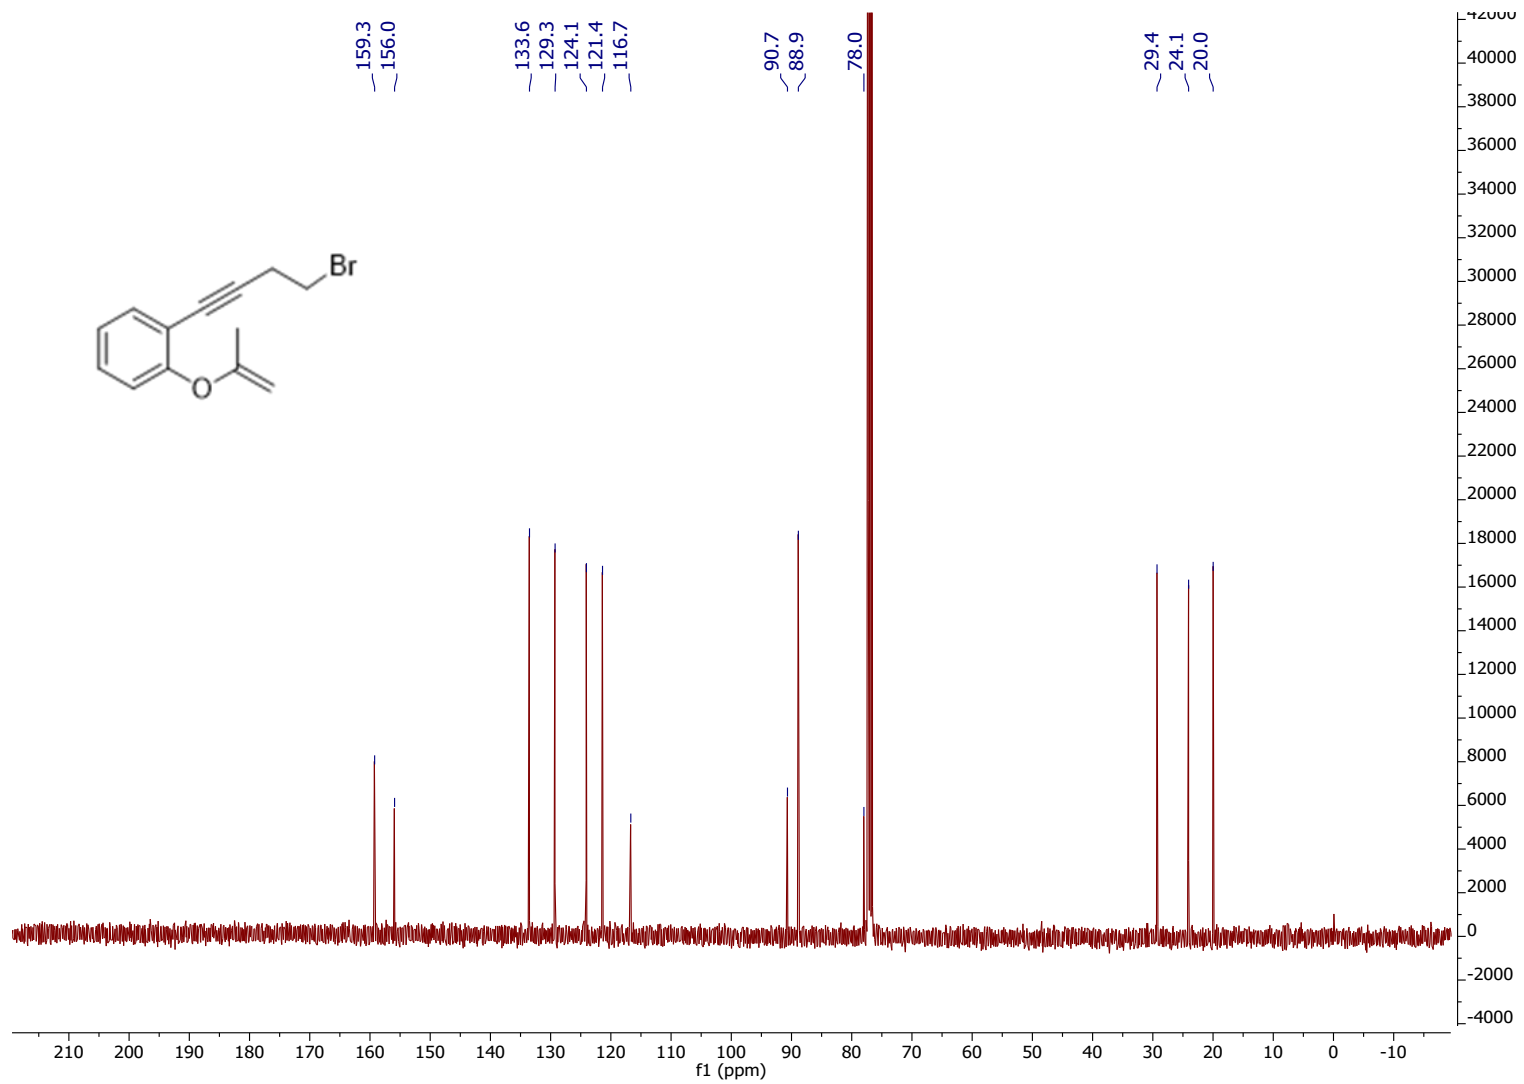

**1s:** *tert*-butyl((3-(5-fluoro-2-(prop-1-en-2-yloxy)phenyl)prop-2-yn-1-yl)oxy)dimethylsilane

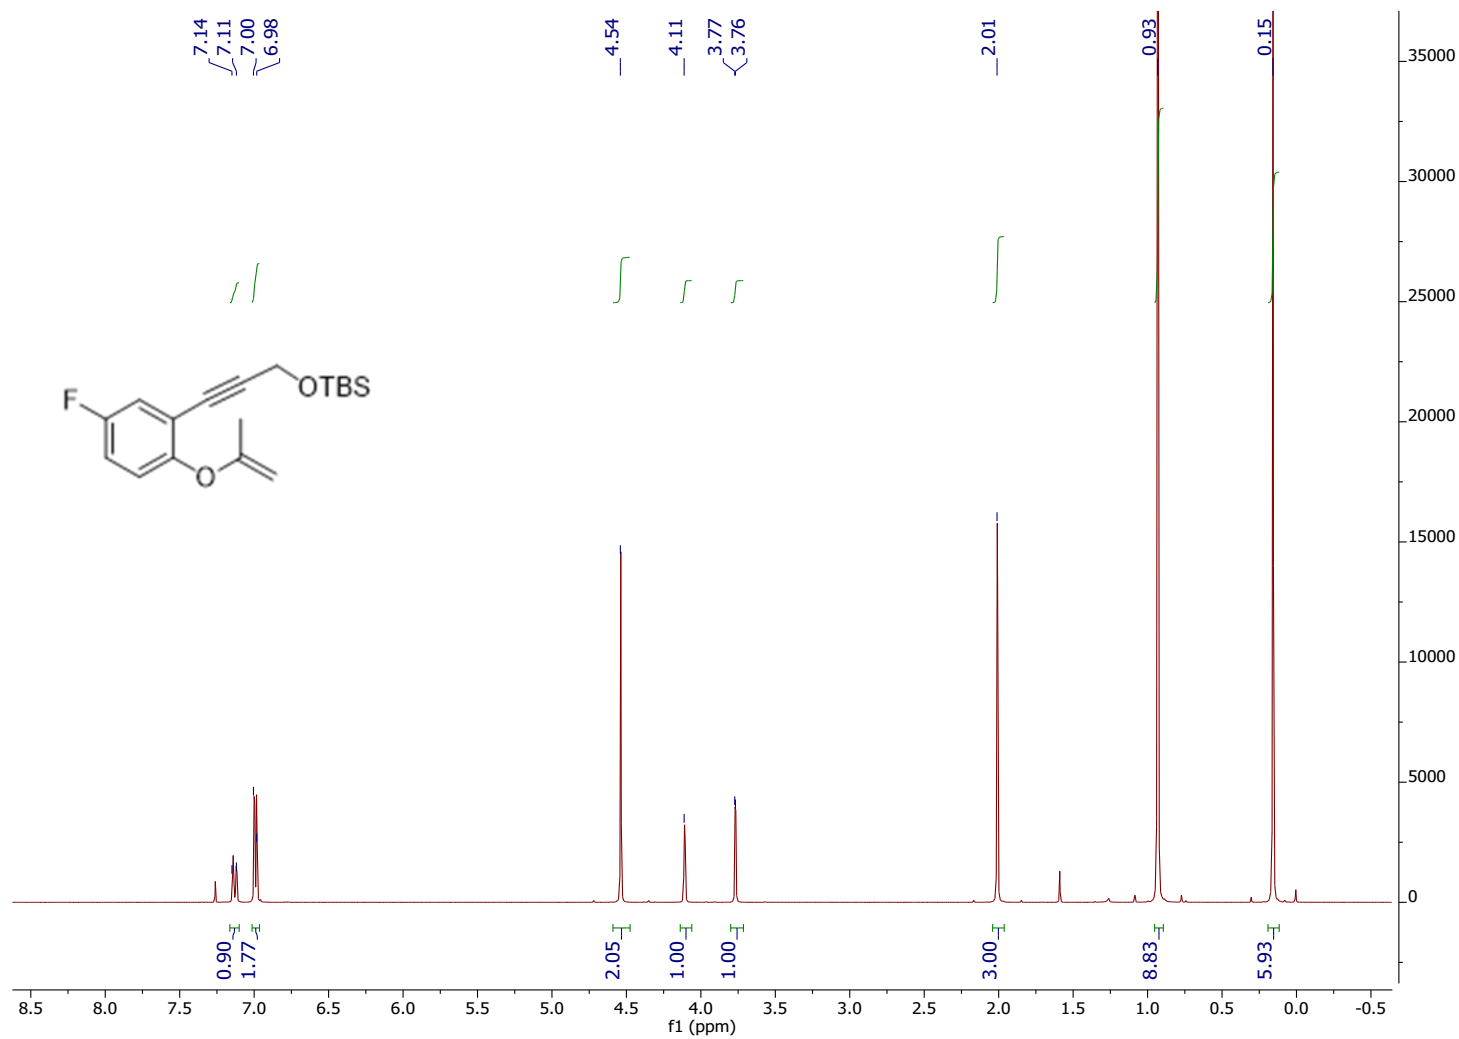

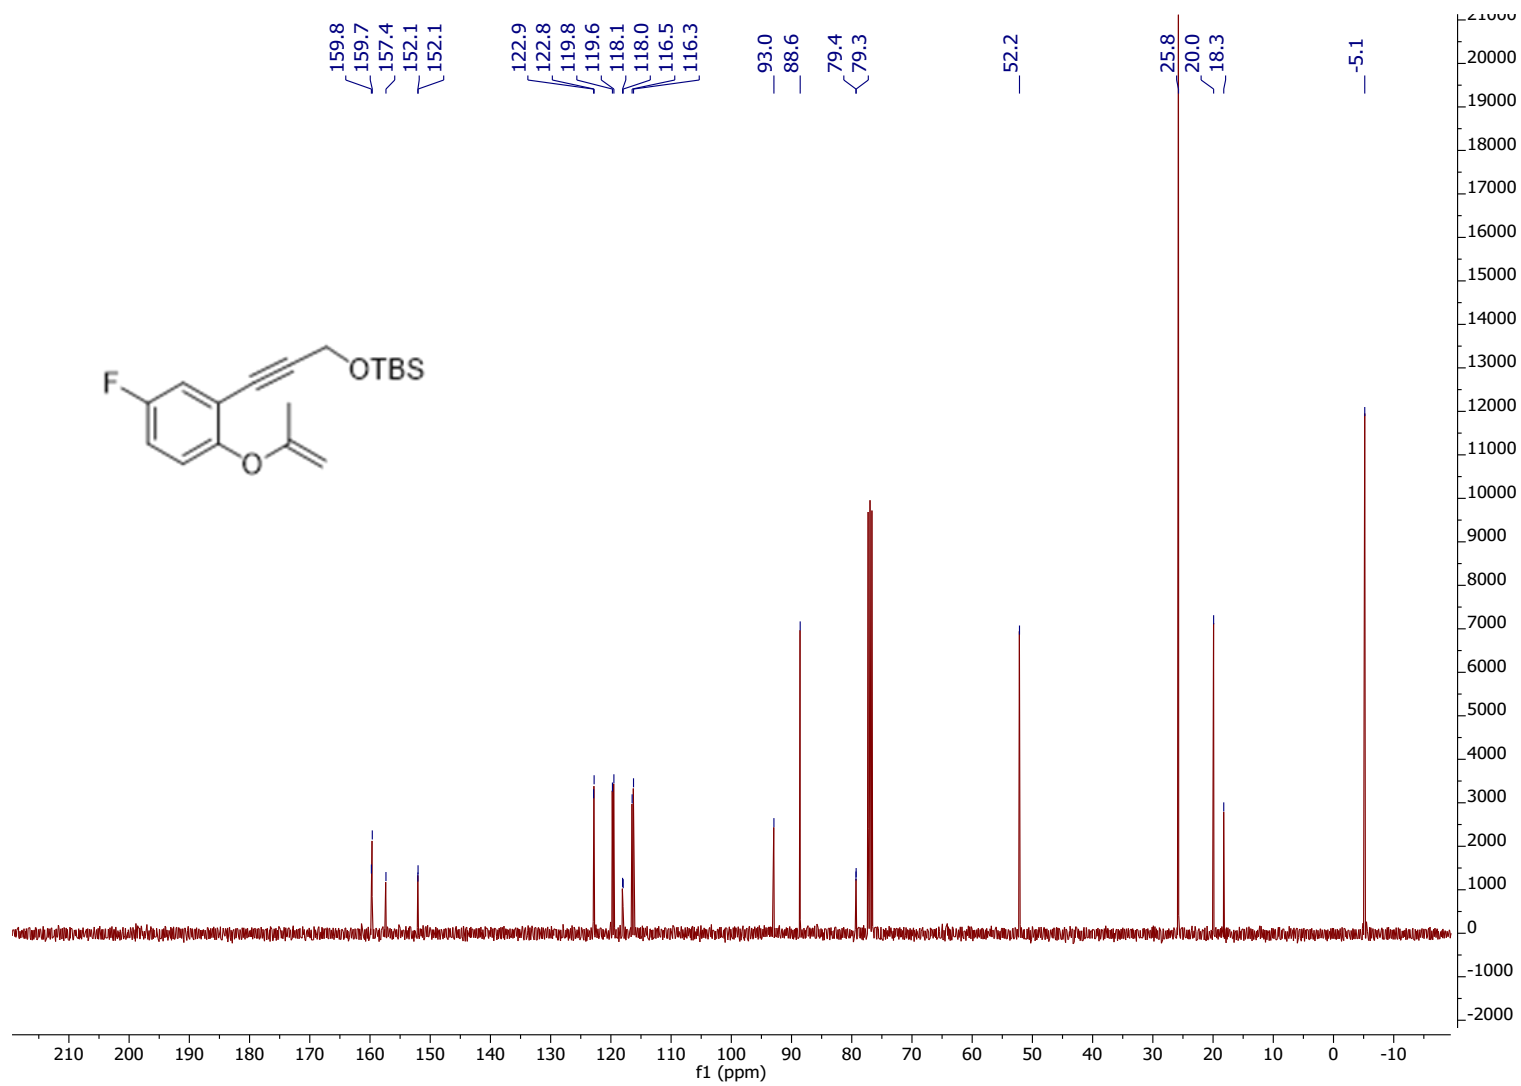

Supplement: d2ra01062c2.pdf [file d2ra01062c2.pdf]
